# Supplementary material for: Menstrual cup use, leakage, acceptability, safety, and availability: a systematic review and meta-analysis
Source: PubMed Central journal article supplement (PMC6669309; doi:10.1016/s2468-2667(19)30111-2), 2019-07-16
Supplement: mmc1.pdf [file mmc1.pdf]

# THE LANCET

## Public Health

### **Supplementary appendix**

This appendix formed part of the original submission and has been peer reviewed. We post it as supplied by the authors.

Supplement to: van Eijk AM, Zulaika G, Lenchner M, et al. Menstrual cup use, leakage, acceptability, safety, and availability: a systematic review and meta-analysis. *Lancet Public Health* 2019; published online July 16. [http://dx.doi.org/10.1016/S2468-2667\(19\)30111-2](http://dx.doi.org/10.1016/S2468-2667(19)30111-2).

# Exploring menstrual products: a systematic review and meta-analysis of menstrual cups for public health internationally

## Contents

|                                                                                                                            |           |
|----------------------------------------------------------------------------------------------------------------------------|-----------|
| Table S1. Some websites with information about menstrual cups.....                                                         | 2         |
| <b>1. Supplemental methods.....</b>                                                                                        | <b>3</b>  |
| Additional information.....                                                                                                | 3         |
| Additional meta-analysis methods for quantitative studies .....                                                            | 3         |
| Methods qualitative analysis.....                                                                                          | 4         |
| Methods visibility and accessibility .....                                                                                 | 4         |
| Methods for comparison of costs and waste .....                                                                            | 4         |
| Changes with protocol.....                                                                                                 | 4         |
| Table S2. Adaptation of quality assessment form for observational studies .....                                            | 5         |
| <b>2. Additional Results.....</b>                                                                                          | <b>6</b>  |
| Table S3. Search results databases from inception to 14 May 2019 .....                                                     | 6         |
| Table S4. Quality assessment of the studies involved (studies with quantitative information) .....                         | 7         |
| Table S5. Manufacturers, city, country, and websites for menstrual cups used in the studies in Table 1 .....               | 8         |
| Table S6. Other functions of the menstrual cup.....                                                                        | 9         |
| <b>Section 2.1. Qualitative studies .....</b>                                                                              | <b>10</b> |
| Table S7: CASP – Appraisal of qualitative studies.....                                                                     | 10        |
| Table S8: Characteristics of Qualitative Papers .....                                                                      | 10        |
| Table S9. Themes in qualitative studies .....                                                                              | 12        |
| <b>Section 2.2 Acceptability .....</b>                                                                                     | <b>14</b> |
| Figure S1. Proportion of participants with menstrual cup leakage in twelve studies, by economic status of the country .... | 14        |
| Table S10. Use of menstrual cup, product related discontinuation and other loss to follow up .....                         | 15        |
| Table S11. Acceptability of the menstrual cup among women who tried the MC .....                                           | 16        |
| Table S12. Information on mobility and odour when using a menstrual cup .....                                              | 17        |
| Figure S2. Proportion of women who reported they could not insert the menstrual cup, studies between 1960 and 2017...      | 17        |
| Figure S3. Proportion of women who reported they used the menstrual cup at least once, studies between 1960 and 2017       | 18        |
| Figure S4. Menstrual cup related discontinuation, studies between 1960 and 2017 .....                                      | 19        |
| Figure S5. Other reasons for discontinuing the menstrual cup, studies between 1960 and 2017.....                           | 19        |
| Figure S6. Reported difficulty with insertion of the menstrual cup by time point of evaluation, 1960-2017.....             | 20        |
| Figure S7. Discomfort when wearing the menstrual cup, studies between 1960 and 2017 by time point of evaluation .....      | 21        |
| Figure S8. Difficulty removing the menstrual cup, studies between 1960 and 2017 .....                                      | 22        |
| Figure S9. Time trends for menstrual cup use in four studies with information from developing countries .....              | 22        |
| Figure S10. Sensitivity analyses, funnel plots and small-study effect.....                                                 | 23        |
| Table S13. Other outcomes examined in association with menstrual cup use .....                                             | 24        |
| <b>Section 2.3 Visibility, availability, costs and waste .....</b>                                                         | <b>25</b> |
| Table S14. Evaluation of potential use of menstrual cup .....                                                              | 25        |
| Table S15. Menstrual items reported in education material for girls .....                                                  | 26        |
| Figure S11. Menstrual items mentioned in education material on menarche, from 69 websites, 27 countries .....              | 28        |
| Costs and availability.....                                                                                                | 29        |
| Figure S12. Countries with brands of menstrual cups (source) and price available.....                                      | 29        |
| Figure S13. Menstrual cup availability in 2018.....                                                                        | 30        |
| Figure S14. Retail price of menstrual cup, by brand .....                                                                  | 31        |
| Figure S15. Retail price of menstrual cup, by Gross National Income per capita of the country .....                        | 33        |
| Table S16. Listing of websites used to assess costs and availability of menstrual cups .....                               | 35        |
| Table S17. Price estimates for commonly used menstrual pads and tampons to obtain an average price per unit.....           | 40        |
| Table S18. Calculations of costs and waste for sanitary pads and tampons over 10 years.....                                | 41        |
| Figure S16. Estimation of costs and waste of different products used for menstruation over 10 years .....                  | 42        |
| <b>3. Web resources .....</b>                                                                                              | <b>43</b> |
| Table S19. Informal information on menstrual cups and serious adverse events on the internet .....                         | 44        |
| <b>References .....</b>                                                                                                    | <b>45</b> |

**Table S1. Some websites with information about menstrual cups**

| <b>Website</b>                                                                                                                                                                                                          | <b>Description</b>                                                                                                                                               |
|-------------------------------------------------------------------------------------------------------------------------------------------------------------------------------------------------------------------------|------------------------------------------------------------------------------------------------------------------------------------------------------------------|
| <a href="https://putacupinit.com">https://putacupinit.com</a>                                                                                                                                                           | Website dedicated to the menstrual cup<br>This site has a <a href="#">Menstrual Cup Comparison Chart</a> and a quiz to assist in finding the right menstrual cup |
| <a href="http://menstrualcup.co">http://menstrualcup.co</a>                                                                                                                                                             | Web site dedicated to the menstrual cup.                                                                                                                         |
| <a href="https://menstrualcups.wordpress.com">https://menstrualcups.wordpress.com</a>                                                                                                                                   | Web site dedicated to the menstrual cup. This site provides a listing of cups available and reviews                                                              |
| <a href="https://en.wikipedia.org/wiki/Menstrual_cup">https://en.wikipedia.org/wiki/Menstrual_cup</a>                                                                                                                   | This site has some history and a global perspective                                                                                                              |
| <a href="https://www.wikihow.com/Use-a-Menstrual-Cup">https://www.wikihow.com/Use-a-Menstrual-Cup</a>                                                                                                                   | This site explains with images on how to insert a cup                                                                                                            |
| <a href="https://www.mycup.co.nz/menstrual-cups-environment/">https://www.mycup.co.nz/menstrual-cups-environment/</a>                                                                                                   | This side provides information on the impact of menstruation on the environment                                                                                  |
| <a href="https://health.clevelandclinic.org/tired-of-tampons-here-are-pros-and-cons-of-menstrual-cups/">https://health.clevelandclinic.org/tired-of-tampons-here-are-pros-and-cons-of-menstrual-cups/</a>               | Summary of pros and cons if you don't have much time                                                                                                             |
| <a href="https://www.1millionwomen.com.au/blog/cup-or-not-cup-common-questions-about-menstrual-cups-answered/">https://www.1millionwomen.com.au/blog/cup-or-not-cup-common-questions-about-menstrual-cups-answered/</a> | Summary of pros and cons if you don't have much time                                                                                                             |
| <a href="http://www.mum.org/MenCups.htm">http://www.mum.org/MenCups.htm</a>                                                                                                                                             | Information on the history of the menstrual cup                                                                                                                  |
| <a href="https://trends.google.com/trends/explore?date=all&amp;q=Menstrual%20cup">https://trends.google.com/trends/explore?date=all&amp;q=Menstrual%20cup</a>                                                           | Information on trends for "menstrual cup" on Google                                                                                                              |

Disclaimer: This list is an example of what is available. We do not endorse any site and do not pretend that this list is complete.

# 1. Supplemental methods

## Additional information

Search strategy: We introduced the keywords in the databases as pairs (e.g. menstrual and cup, menses and cup) and combined searches at a second stage. In PubMed, menstrual, menses, menstruation and vaginal were used as Mesh terms and “all fields” terms. Cup is not a Mesh term. To check for completeness, we screened several other databases (See Table S2) for eligible items which were not yet included in the list resulting from the searched databases. We also checked reference lists, web material, and consulted colleagues. Records from the different searches were merged, and duplicates removed; a first screening was conducted to assess potential eligibility whereby irrelevant records were removed, based on the material available (abstract or whole text). Full text articles were obtained as much as possible for the remaining articles, and these were further screened for eligibility. With regards to identifying studies, menstrual hygiene did not need to be the main topic; e.g. studies not completely about menstrual hygiene but presenting useful information could still be included. Language: We did not exclude articles in other languages than English a-priori but decided that in case of retrieval of articles in other languages, an attempt might be done to verify content for inclusion if a person could be identified who mastered that language; however, the search was conducted in English. Searches in Google were repeated for adverse events identified in the literature (e.g. menstrual cup and retention, infection, urination, endometriosis, and toxic-shock syndrome). Reference lists of relevant studies, websites of pertinent professional bodies (e.g. FDA), non-governmental organizations and ‘grey literature’ (e.g., reports or conference abstracts) were searched, as well as records recommended by contacting experts, to encompass a broad range of available literature. Using pre-tested forms, we extracted data on baseline characteristics and outcomes. Study characteristics included study design, number of participants, age, location, country, time-period of study, type of MC involved, and type of menstrual item used before study, in addition to inclusion and exclusion criteria, and follow up time where applicable. If the year of study was not reported in an eligible study, we assumed it to be two years before the publication date. For studies with outcomes after e.g. cycle 1, cycle 2 and cycle 3, the result for the last cycle was taken. For studies where the follow up was longer, more time points after cycle 2 were included. For some studies, additional information from the authors could be obtained.<sup>1-3</sup> The Picots-framework is presented below.

## PICOTS Framework

| Components   |                                                                                                                                                                                                                                                                                                                                                                                                                                                                                                                                                                                                                                                                                                                                                                                                                                                                                                                                                                                                                                                                                                                                                                                             |
|--------------|---------------------------------------------------------------------------------------------------------------------------------------------------------------------------------------------------------------------------------------------------------------------------------------------------------------------------------------------------------------------------------------------------------------------------------------------------------------------------------------------------------------------------------------------------------------------------------------------------------------------------------------------------------------------------------------------------------------------------------------------------------------------------------------------------------------------------------------------------------------------------------------------------------------------------------------------------------------------------------------------------------------------------------------------------------------------------------------------------------------------------------------------------------------------------------------------|
| Population   | Menstruating women<br>-Subgroup analysis: <ul style="list-style-type: none"> <li>○ High income versus low and middle-income countries</li> <li>○ Age: adult vs. adolescent women</li> <li>○ Type of cup: diaphragm-type of cup (e.g. Instead, which covers the cervix) vs. bell-shape cup (with space between cervix and cup, e.g. Mooncup)</li> </ul>                                                                                                                                                                                                                                                                                                                                                                                                                                                                                                                                                                                                                                                                                                                                                                                                                                      |
| Intervention | Menstrual cup                                                                                                                                                                                                                                                                                                                                                                                                                                                                                                                                                                                                                                                                                                                                                                                                                                                                                                                                                                                                                                                                                                                                                                               |
| Control      | Other methods for menstrual hygiene management                                                                                                                                                                                                                                                                                                                                                                                                                                                                                                                                                                                                                                                                                                                                                                                                                                                                                                                                                                                                                                                                                                                                              |
| Outcomes     | Effectiveness: <ol style="list-style-type: none"> <li>1. Direct effects: Improved menstrual hygiene               <ol style="list-style-type: none"> <li>a. Prevention of leaking</li> </ol> </li> <li>2. Indirect effects: effect of cup use compared to other methods on outcomes such as wellbeing and equity</li> </ol> Safety: <ol style="list-style-type: none"> <li>1. Serious adverse events</li> <li>2. Effect on vagina and vaginal flora</li> <li>3. Effect on reproductive, digestive or urinary tract</li> <li>4. Safety when sanitary conditions are not optimal</li> <li>5. Other</li> <li>6. Factors affecting the use of the cup</li> </ol> Acceptability and user-friendliness: <ol style="list-style-type: none"> <li>1. Ease to insert, comfort of wearing, odour, mobility, ease of removal, ease of maintenance               <ol style="list-style-type: none"> <li>a. Willingness to use among potential users or willingness to continue use among new users</li> </ol> </li> <li>2. Costs and availability (cup master list)</li> <li>3. Knowledge about option of cup among the arsenal of options for menstrual hygiene management (separate search)</li> </ol> |
| Timing       | No restriction                                                                                                                                                                                                                                                                                                                                                                                                                                                                                                                                                                                                                                                                                                                                                                                                                                                                                                                                                                                                                                                                                                                                                                              |
| Setting      | Any trial, quasi-experimental study, survey or other type of study reporting on experiences with cup use for menstrual hygiene management. Search in English                                                                                                                                                                                                                                                                                                                                                                                                                                                                                                                                                                                                                                                                                                                                                                                                                                                                                                                                                                                                                                |

## Additional meta-analysis methods for quantitative studies

When using meta-analysis, the extent of heterogeneity was measured using the  $I^2$  statistic,<sup>4</sup> which is a measure of the proportion of total variability explained by heterogeneity rather than chance expressed as a percentage, with 0–40% representing no or little heterogeneity, 30–60% moderate heterogeneity, 50–90% substantial heterogeneity, and 75–100% considerable heterogeneity.<sup>5</sup> We examined the following sources of heterogeneity if sufficient data were available using subgroup analysis: setting of the study (high-income [HIC] versus LMIC), study population (adult women versus girls aged 12-17 years), year of study (study conducted before or after 2000), type of menstrual cup used (cervical versus vaginal cup) and duration of menstrual cup use. We assessed publication and small-study bias by visual inspection of funnel plots for the outcome of reported MC use in the future.<sup>6,7</sup>

## **Methods qualitative analysis**

We followed the Critical Appraisal Skills Programme tool to examine the quality of the studies.<sup>8</sup> While the tool does not provide a definitive score to judge studies on their quality and / or include or exclude them, it enables the reader to understand the rigour of each study and the transparency of reporting, thus facilitating judgement of quality and interpretation of results. Two reviewers (LM and GZ) assessed each study independently, and examined and summarised the findings from these studies in combination to ensure a more robust and comprehensive explanation than would occur if each individual study was considered in isolation.<sup>9</sup> The data were analysed using thematic synthesis as described by Thomas and Harden (2008).<sup>10</sup> Separately, the 2 qualitative reviewers extracted the themes and subthemes, along with illustrative quotes where applicable, from a first paper, and repeated this process for additional papers until a complete table of themes and subthemes with quotes was devised. A comparison of both tables was made, and a single definitive table produced. From this, the reviewers identified six key themes and eight subthemes, which were written up in narrative form with illustrative quotations. These qualitative results were integrated with quantitative results in the results section, but the full results are also available in Supplement section 3.1.

## **Methods visibility and accessibility**

To assess visibility of the menstrual cup, we used websites of governments and non-governmental organizations to obtain education materials to prepare girls for menarche from countries where the review-authors were familiar with the language (English, German, French, Spanish, and Portuguese; conducted by GZ, ML & AMvE). Search terms for this part included a country name, “menstruation”, and “information”, separate and in combination with “adolescent girls”, and terms were translated where applicable. Websites from commercial providers of menstrual items were excluded, where identified. We compiled if sanitary pads, tampons and menstrual cups were reported in the material.

To assess the availability and price of menstrual cups, we used the “Menstrual Cup Master List”, a web source of vaginal menstrual cups available globally,<sup>11</sup> and other sources (e.g. websites from menstrual cups and experts) to find countries where brands were based. Each individual brand was searched to identify its availability for purchase, through the web or otherwise. We determined if a cup was available in a country. If it was available for sale in a retail store or if you could purchase it directly through their website or an intermediary ecommerce website locally. Where possible we identified the countries in which each brand was purchasable, and its respective price. When brands had no country of origin listed, company FAQs and consumer reviews were scanned to identify brand location. Prices reported in local currencies were converted to United States Dollars with the applicable exchange rate on 31 August 2018. If there were a range of menstrual cup products available for purchase, we selected the “original” model. If items were available for bulk purchase at a subsidized cost, we selected the purchase price when buying an individual unit. If individual units could not be purchased, we divided the bulk price by the number of units to calculate the individual unit cost. When pricing differed across adolescent and adult users, we selected the “adult” size for comparison purposes. We also checked with experts to find out if there were cups which were missing on the list. Between July 2017 and August 2018, 145 brands available for purchase (141 with an identified country of origin) were compiled. When separating cups by country wealth quartile, we classified countries according to the 2017 Atlas rankings developed by the World Bank. This method sorts countries by Gross National Income per capita.

## **Methods for comparison of costs and waste**

For estimates on use of pads and tampons, we used estimates from included studies.<sup>12-14</sup> However, because use of sanitary products may depend on type of flow, we decided to examine a range, varying from 9 to 25 items per month (Table S16). For estimations on costs of pads and tampons, we explored prices for Tampax (cardboard applicator) and OB tampons, and Always and Kotex pads in the USA, the UK, India, Spain, China and Canada on Amazon Prime (data obtained on 5 October 2018, GZ & AMvE); prices were converted in US dollars using the conversion rate on August 31, 2018 and calculated price per pad or tampon (Table S12). The average cost for one tampon and one pad was 0.21 dollar (range 0.12-0.38) and 0.31 US dollar (range 0.15-0.55), respectively. For estimates on weight and information on biodegradable content we used the report by Mazgaj et al. (2006) for a Libresse pad and OB tampon.<sup>15</sup> We used 6.8 grams as the weight of a menstrual pad and a plastic content of 35% of the weight; corresponding numbers for tampons were 3.6 grams and a plastic content of 4% of the weight. As an estimate of monthly blood loss we used 35 ml (normal range is 5-80 ml).<sup>16</sup> For the menstrual cup estimates we assumed a vaginal cup with a life time of 10 years, weighing about 15 grams, and the median price of a menstrual cup in US dollars as previously obtained. We did not include the amount of blood lost in the calculation of waste for the menstrual cup, because this blood is not absorbed as in a tampon or pad.

## **Changes with protocol**

We were unable to access the database Psychinfo. We screened the first 50 pages (500 entries) of Google Scholar. In addition, we screened the databases Science.gov and WorldWideScience to check if our information was complete. We excluded studies where the MC was purely used to obtain gynaecological samples, even if data on the experience of participants was presented, because generally their experience only covered a select period of one cycle. For quality assessments of included cohort studies we used an adaptation of the Newcastle-Ottawa tool. Limitations of this tool were the absence of a clear non-exposure group and verification of exposure and outcome. In studies where experiences among menstrual cup-users were compared with their previous experiences with other menstrual products, we assumed a before-after design, with a non-exposed group having the same characteristics as the exposed group. A study was considered moderate-to-good, if at least 4 criteria had been satisfied in the adapted Newcastle-Ottawa score (Table S1) or 5 in the Cochrane tool for trials. Because of the wide variability in types of reported outcomes, e.g. for leaking, we could not combine results from different studies using a risk ratio. We compared reported outcomes; however, given that most studies were “before-after design”, using the same women reporting for experiences with MC and routine products, the use of a chi-square test would have been inappropriate but insufficient information was available for a

McNemar test. We intended to use the quality assessment as part of meta-regression and sensitivity analysis but decided not to conduct meta-regression because of the limited number of high-quality studies for meaningful comparisons, and the limited added value when conducting meta-regression.

**Table S2. Adaptation of quality assessment form for observational studies**

|   | Focus area                                                                                                                                                                  | Category options†                                                                                                                                                                                                                                                                                                                                                                                                                                                                                                                                                                                                                             |
|---|-----------------------------------------------------------------------------------------------------------------------------------------------------------------------------|-----------------------------------------------------------------------------------------------------------------------------------------------------------------------------------------------------------------------------------------------------------------------------------------------------------------------------------------------------------------------------------------------------------------------------------------------------------------------------------------------------------------------------------------------------------------------------------------------------------------------------------------------|
| 1 | Representativeness of the exposed group<br><br>a) Is a description how women were recruited present?<br>b) If there is, are women representative of women in the community? | <ul style="list-style-type: none"> <li>a) truly representative of women in the community (e.g. random selection in community) *</li> <li>b) somewhat representative of the average woman in the community *</li> <li>c) selected group of women (e.g. women who were enrolled from a clinic population)</li> <li>d) no description of the derivation of the group</li> </ul> <p><i>Adaptation: 1 point if description present and women representative of women in the community (if not clear how recruited, or recruited from a clinic: 0 points).</i></p>                                                                                  |
| 2 | Selection of the non-exposed group                                                                                                                                          | <ul style="list-style-type: none"> <li>a) drawn from the same community/pool as the exposed group *</li> <li>b) drawn from a different source</li> <li>c) no description of the derivation of the non-exposed group</li> </ul> <p><i>Adaptation: If information is used from women before they were enrolled (e.g. a before-after study), or if there is control group that is coming from the same source as the exposed group: 1 point. Otherwise 0.</i></p>                                                                                                                                                                                |
| 3 | Ascertainment of exposure                                                                                                                                                   | <ul style="list-style-type: none"> <li>a) Inspection cup or colour change cup, or cup in situ</li> <li>b) combination of cup inspection and interview</li> <li>c) unsecure record</li> <li>d) written self-report</li> <li>e) no description</li> </ul> <p><i>Adaptation: If cup colour change used 1 point, otherwise no objective measure: 0 points.</i></p>                                                                                                                                                                                                                                                                                |
| 4 | Comparability of exposed and unexposed group                                                                                                                                | <ul style="list-style-type: none"> <li>a) differences examined and no differences reported in characteristics which are presented *</li> <li>b) differences in characteristics present but no effect on outcome, or multivariate analysis for outcome available or randomized study *</li> <li>c) differences in characteristic present, not shown if effect on outcome</li> <li>d) no description/not examined</li> </ul> <p><i>Adaptation: If it is comparable to a before-after study or a comparison among characteristics of women who used and did not use the cup and no differences, 1 point. If it is not present, 0 points.</i></p> |
| 5 | Outcome assessment (leakage, frequency of change, vaginal inspection, bacterial cultures): not possible                                                                     | <ul style="list-style-type: none"> <li>a) independent blind assessment (observations or laboratory tests) *</li> <li>b) record linkage (for observations or laboratory tests) *</li> <li>c) not clear</li> <li>d) no blind assessment (verbal or written reports)</li> <li>e) no description</li> </ul> <p><i>Adaptation: if laboratory tests or inspection of vagina 1 point, if verbal report 0 points.</i></p>                                                                                                                                                                                                                             |
| 6 | Attrition                                                                                                                                                                   | <ul style="list-style-type: none"> <li>a) complete - all subjects accounted for *</li> <li>b) outcome not available for all subjects but unlikely to introduce bias - small number lost - &lt;20%, or description provided of those lost *</li> <li>c) outcome for less than 80% of people with exposure data and no description of those lost</li> <li>d) no statement</li> </ul>                                                                                                                                                                                                                                                            |

\* A study could be awarded a maximum of one point for each item, so in total 6 points.

## 2. Additional Results

**Table S3. Search results databases from inception to 14 May 2019**

|    | Source and website                                                                                                                                                                                                                                                                                                                                                            | Result (number)          |
|----|-------------------------------------------------------------------------------------------------------------------------------------------------------------------------------------------------------------------------------------------------------------------------------------------------------------------------------------------------------------------------------|--------------------------|
| 1  | PubMed<br><a href="https://www.ncbi.nlm.nih.gov/pubmed">https://www.ncbi.nlm.nih.gov/pubmed</a>                                                                                                                                                                                                                                                                               | 179                      |
| 2  | Web of Science (or Knowledge)<br><a href="https://webofknowledge.com">https://webofknowledge.com</a>                                                                                                                                                                                                                                                                          | 217                      |
| 3  | Cochrane library<br><a href="http://www.cochranelibrary.com">http://www.cochranelibrary.com</a>                                                                                                                                                                                                                                                                               | 79                       |
| 4  | Popline<br><a href="https://www.popline.org">https://www.popline.org</a>                                                                                                                                                                                                                                                                                                      | 41                       |
| 5  | Medline, Global Health and Cinahl through Ebscohost<br><a href="https://www.ebsco.com/products/research-databases/global-health">https://www.ebsco.com/products/research-databases/global-health</a><br><a href="https://www.ebscohost.com/nursing/products/cinahl-databases/cinahl-complete">https://www.ebscohost.com/nursing/products/cinahl-databases/cinahl-complete</a> | 290                      |
| 6  | Emerald<br><a href="http://www.emeraldinsight.com">http://www.emeraldinsight.com</a>                                                                                                                                                                                                                                                                                          | 30                       |
| 7* | Science.gov<br><a href="https://www.science.gov">https://www.science.gov</a>                                                                                                                                                                                                                                                                                                  | 200 screened<br>(3 new)  |
| 8  | WorldWideScience<br><a href="https://worldwidescience.org">https://worldwidescience.org</a>                                                                                                                                                                                                                                                                                   | 200 screened<br>(1 new)  |
| 9  | Google Scholar<br><a href="https://scholar.google.com/">https://scholar.google.com/</a>                                                                                                                                                                                                                                                                                       | 500 screened<br>(30 new) |
| 10 | Co-authors/references                                                                                                                                                                                                                                                                                                                                                         | 9 new                    |
| 11 | FDA Database (Maude)                                                                                                                                                                                                                                                                                                                                                          | 15 case-reports†         |

Keywords: (Menstrual AND Cup) OR (Menses AND Cup) OR (Menstruation AND Cup) OR (Vaginal AND Cup)

\* Screened databases (7 to 9) were checked for eligible items which were not yet included in the list resulting from databases 1-6

† The FDA Database was last searched on 28 May 2019. Four case-reports on softcups excluded before 2011 because of potential overlap with reporting by North and Oldham (2011).<sup>14</sup>

**Table S4. Quality assessment of the studies involved (studies with quantitative information)**

**Table S4a. Trials**

| Study                              | Random-sequence generation                     | Allocation concealment                                                     | Blinding participants /staff | Blinding outcome assessment                                             | Incomplete outcome data             | Selective reporting                                     | Other bias                                                               | Total             |
|------------------------------------|------------------------------------------------|----------------------------------------------------------------------------|------------------------------|-------------------------------------------------------------------------|-------------------------------------|---------------------------------------------------------|--------------------------------------------------------------------------|-------------------|
| Beksinska 2015 <sup>13,17,18</sup> | Computer-generated                             | Yes "Allocations were concealed in sequentially numbered sealed envelopes" | No                           | No (cross-over)                                                         | 5/110 (4.5%), balanced over arms    | Not detected                                            | None detected                                                            | High quality 5    |
| Hoffman 2014 <sup>19</sup>         | Roll of dice                                   | Yes, sealed envelop                                                        | No                           | Not reported                                                            | 15.8%, balanced over arms (no data) | Not detected                                            | Cross-over of arms diluted MC effect                                     | Low-to-moderate 4 |
| Howard 2011 <sup>12</sup>          | Computer-generated                             | Not specified                                                              | No                           | Not reported                                                            | 13/110 (11.8%), balanced over arms  | Not detected                                            | Sample size not achieved                                                 | Low-to-moderate 3 |
| Oster 2011 <sup>20-23</sup>        | Lottery (drawing numbers from bag)             | Yes                                                                        | No                           | Not reported                                                            | 1/199 (0.5%), balanced over arms    | Follow up time per arm not reported. Ambiguous outcome. | Girls who were not yet menstruating were not excluded, unequal over arms | Low-to-moderate 3 |
| Phillips-Howard 2016 <sup>1</sup>  | Drawing balls from bag and concealed envelopes | Yes, concealed envelopes                                                   | No                           | Yes (allocation concealed from laboratory staff and trial statistician) | 122/776 (15.7%), balanced over arms | Not detected                                            | None detected                                                            | High quality 6    |

**Table S4b. Observational cohort studies**

| Study                                                  | Women representative of community                 | Non-exposed from same group          | Ascertainment of exposure | Comparability of groups | Outcome assessment (observed/laboratory test vs. verbal/written) | Loss to follow up                                            | Total             |
|--------------------------------------------------------|---------------------------------------------------|--------------------------------------|---------------------------|-------------------------|------------------------------------------------------------------|--------------------------------------------------------------|-------------------|
| APHRC 2010 <sup>24-26</sup>                            | Unclear                                           | Yes (assessed as before/after study) | Verbal report             | Same group              | Verbal/written report                                            | 6/96 (6.3%)                                                  | Low-to-moderate 3 |
| Care International Uganda 2018 <sup>27</sup>           | Unclear                                           | Yes (assessed as before/after study) | Verbal report             | Same group              | Verbal/written report                                            | 43/80 (53.8%)                                                | Low-to-moderate 2 |
| Cattanach 1990, 1991 <sup>28,29†</sup>                 | No (private clinic, volunteers)                   | Yes (assessed as before/after study) | Verbal report             | Same group              | Verbal/written report                                            | 259 women contacted and 80 respondents (69.1% attrition)     | Low-to-moderate 2 |
| Cheng 1995 <sup>30</sup>                               | Unclear                                           | Yes (assessed as before/after study) | Verbal report             | Same group              | Verbal/written report                                            | Not reported                                                 | Low-to-moderate 2 |
| Chintan 2017 <sup>31</sup>                             | Not representative (women in waiting area clinic) | Yes (assessed as before/after study) | Verbal report             | Same group              | Verbal/written report                                            | Not reported                                                 | Low-to-moderate 2 |
| Femme International <sup>2 ‡‡</sup>                    | Not representative (School girls and adult women) | Yes (assessed as before/after study) | Verbal report             | Same group              | Verbal/written report                                            | Not reported or high (37-88%) (different study populations)  | Low-to-moderate 2 |
| Ganyaglo 2019 <sup>32</sup><br>Ryan 2018 <sup>33</sup> | Women with vesicovaginal fistula                  | Yes (assessed as before/after study) | Unclear                   | Same group              | Measurement of urine leakage                                     | 0%                                                           | High quality 5    |
| Gleeson 1993 <sup>34</sup>                             | Not representative (clinic).                      | Yes (assessed as before/after study) | Verbal report             | Same group              | Verbal/written report                                            | 0%                                                           | Low-to-moderate 3 |
| Kakani 2017 <sup>35</sup>                              | Not representative (clinic)                       | Yes (assessed as before/after study) | Verbal report             | Same group              | Verbal/written report                                            | 8/158 (5.1%)                                                 | Low-to-moderate 3 |
| Madziyire 2018 <sup>3,36 ‡‡</sup>                      | Not representative (family planning clinic)       | Yes (assessed as before/after study) | Verbal report             | Same group              | Verbal/written report                                            | 2/54 (3.7%)                                                  | Low-to-moderate 3 |
| North 2011 <sup>14</sup>                               | Not representative (clinics)                      | Yes (assessed as before/after study) | Unclear                   | Same group              | Verbal/written report, observations and laboratory tests         | 98/406 (24.1%)                                               | Low-to-moderate 3 |
| Parker 1966 <sup>37</sup>                              | Not representative (clinics).                     | Yes (assessed as before/after study) | Verbal report             | Same group              | Verbal/written report                                            | 7/46 (15.2%) Loss not clear for 19 women with normal menses. | Low-to-moderate 3 |



|                            |                                      |                                      |               |            |                                                          |                    |                   |
|----------------------------|--------------------------------------|--------------------------------------|---------------|------------|----------------------------------------------------------|--------------------|-------------------|
| Pena 1962 <sup>38</sup>    | Not clear how recruited              | Yes (assessed as before/after study) | Verbal report | Same group | Verbal/written report, vaginal inspection                | Not reported       | Low-to-moderate 2 |
| Shihata 2014 <sup>39</sup> | Not representative (clinics)         | Yes (assessed as before/after study) | Verbal report | Same group | Verbal/written report                                    | 41/146 (28.1%)     | Low-to-moderate 2 |
| Stewart 2010 <sup>40</sup> | Not representative (students)        | Yes (assessed as before/after study) | Verbal report | Same group | Verbal/written report                                    | 33/54 (61.1%)      | Low-to-moderate 2 |
| Tellier 2012 <sup>41</sup> | Not representative (including staff) | Yes (assessed as before/after study) | Verbal report | Same group | Verbal/written report, observations and laboratory tests | 16/31 (51.6%)      | Low-to-moderate 3 |
| Wiebe 2012 <sup>42</sup>   | Representative for IUD users         | Yes (assessed as before/after study) | Verbal report | Same group | Retrospective chart survey; linking                      | Can't be assessed. | NA                |

**Table S4c. Observational surveys (no score assigned)**

| Study                       | Study population                                                       | Random sample | Sample size, refusal rate                                       |
|-----------------------------|------------------------------------------------------------------------|---------------|-----------------------------------------------------------------|
| Averbach 2009 <sup>43</sup> | Convenience sample from public clinics, markets and shopping centres   | No            | 43, not reported                                                |
| Borowski 2011 <sup>44</sup> | Colleagues, friends, and family of co-workers, survey link on Facebook | No            | 160, not reported                                               |
| Grose 2014 <sup>45</sup>    | Female undergraduates                                                  | No            | 168, 5 excluded (using MC) and 12 excluded for incomplete forms |
| Stewart 2010 <sup>46</sup>  | Patients attending a menstrual disorder clinic                         | No            | 69, not reported                                                |

**Table S5. Manufacturers, city, country, and websites for menstrual cups used in the studies in Table 1**

| Cup                  | Manufacturer                                               | City/country                                                                   | Website                                                                                                                                |
|----------------------|------------------------------------------------------------|--------------------------------------------------------------------------------|----------------------------------------------------------------------------------------------------------------------------------------|
| <b>Be' Cup</b>       | Laboratoires Juva Santé                                    | Paris, France                                                                  | <a href="https://www.becup.fr/">https://www.becup.fr/</a>                                                                              |
| <b>Butterfly</b>     | Butterfly Cup Company                                      | Harare, Zimbabwe                                                               | <a href="http://www.thebutterflycup.co.zw/">http://www.thebutterflycup.co.zw/</a>                                                      |
| <b>Diva cup</b>      | Diva International, Inc.                                   | Ontario, Canada                                                                | <a href="https://divacup.com/contact-us/">https://divacup.com/contact-us/</a>                                                          |
| <b>Duet</b>          | ReProtect, Inc.                                            | Baltimore, USA                                                                 | <a href="http://www.reprotect.com/products.shtml">http://www.reprotect.com/products.shtml</a>                                          |
| <b>FemmyCycle</b>    | FemCap Inc                                                 | Del Mar, USA                                                                   | <a href="https://femmycycle.com/">https://femmycycle.com/</a>                                                                          |
| <b>Flow Care</b>     | Not clear                                                  | India                                                                          | No website identified. Not clear if still in production                                                                                |
| <b>Gynaeseal</b>     | Chattan Australia Ptv. Ltd                                 | Australia                                                                      | Out of production                                                                                                                      |
| <b>Keeper</b>        | The Keeper, Inc                                            | Cincinnati, USA                                                                | <a href="https://keeper.com/">https://keeper.com/</a>                                                                                  |
| <b>LadyCup</b>       | Jaguara, s.r.o.                                            | Offices in Prague, Czech Republic, Stuttgart, Germany, and Valley Cottage, USA | <a href="https://www.ladycup.eu/">https://www.ladycup.eu/</a>                                                                          |
| <b>MeLuna</b>        | Me Luna GmbH                                               | Haundorf, Germany                                                              | <a href="https://www.me-luna.eu/en_GB">https://www.me-luna.eu/en_GB</a><br><a href="https://meluna-usa.com">https://meluna-usa.com</a> |
| <b>Menses cup</b>    | Shanghai Newboasia Medical Rubber Factory                  | Shanghai                                                                       | Not clear if still in production                                                                                                       |
| <b>Mooncup</b>       | Mooncup Ltd                                                | Brighton, UK                                                                   | <a href="https://www.mooncup.co.uk">https://www.mooncup.co.uk</a>                                                                      |
| <b>Mpower / Mcup</b> | Mpower                                                     | Cape Town, South Africa                                                        | <a href="http://mpowercup.co.za/">http://mpowercup.co.za/</a>                                                                          |
| <b>Ruby cup</b>      | Ruby Cup, Ruby Life                                        | Barcelona, Spain and London, UK                                                | <a href="https://rubycup.com">https://rubycup.com</a>                                                                                  |
| <b>Softcup</b>       | Instead, Inc., San Diego, CA<br>Now softdisc, Flex company | Venice, CA, USA                                                                | <a href="http://softdisc.com">http://softdisc.com</a>                                                                                  |
| <b>Tasette</b>       | Tasette, Inc.                                              | Stanford, CT, USA                                                              | Out of production                                                                                                                      |
| <b>Tassaway</b>      | Tasette, Inc.                                              | Stanford, CT, USA                                                              | Out of production                                                                                                                      |

MCs in alphabetical order

**Table S6. Other functions of the menstrual cup**

| Function                                                                                     | Cup type                           | Numbers (%) or description                                                                                                                                                                              | Notes                                                                                                                                                                                                                                                                                                                                                                                                                                                       | Source                                                 |
|----------------------------------------------------------------------------------------------|------------------------------------|---------------------------------------------------------------------------------------------------------------------------------------------------------------------------------------------------------|-------------------------------------------------------------------------------------------------------------------------------------------------------------------------------------------------------------------------------------------------------------------------------------------------------------------------------------------------------------------------------------------------------------------------------------------------------------|--------------------------------------------------------|
| Reduction or control of leakage from enterovaginal or vesicovaginal or vesicouterine fistula | NR (vaginal)                       | Case report: Symptoms of urine leakage improved during menses when she used a menstrual cup                                                                                                             | “When evaluating women with urinary incontinence and a history of caesarean deliveries, use of menstrual cup may aid in the diagnosis of vesicouterine fistula.”                                                                                                                                                                                                                                                                                            | Goldberg 2016 <sup>47</sup>                            |
|                                                                                              | NR (vaginal)                       | 2 case reports                                                                                                                                                                                          | “In two cases of vesicovaginal fistula, the menstrual cup was used with great success for control of urinary leakage”                                                                                                                                                                                                                                                                                                                                       | Parker 1966 <sup>37</sup>                              |
|                                                                                              | NR (vaginal)                       | Three case reports of menstrual cup use to assist in palliative therapy                                                                                                                                 | “This simple and inexpensive device should be considered in those cases in which the drainage can be diverted as a viable option, especially in those who are symptomatic and awaiting surgical repair or in those for whom surgery cannot be performed.”                                                                                                                                                                                                   | Russel 2016 <sup>48</sup>                              |
|                                                                                              | NR (vaginal)                       | Study to assess the feasibility and acceptability of the vaginal menstrual cup for short-term management of vesicovaginal fistula (VVF) among 11 women seeking treatment at a health facility in Ghana. | “The repeated measures design utilizes a 2-hr pad test to compare urinary leakage with and without the insertable cup...”<br>“With the cup, women experienced an average 61.0% ( $\pm 37.4$ ) (95% CI: 35.9–86.2) leakage reduction, a difference 10/11 users (91.0%) perceived in reduced leakage.”<br>“Acceptability and appropriateness among women was high as most could easily insert (72.73%), remove (72.73%), and comfortably wear (100%) the cup” | Ganyaglo 2019 <sup>32</sup><br>Ryan 2018 <sup>33</sup> |
| Contraceptive                                                                                | Gynaeseal (reusable cervical cup)  | 33/73 (45.3%) women used the cup as contraceptive: 1 unplanned pregnancy (follow up 18 months after start of study)                                                                                     | In this study it was not used in combination with spermicides                                                                                                                                                                                                                                                                                                                                                                                               | Cattanach 1991 <sup>29</sup>                           |
| Facilitator of intercourse during menstruation                                               | Soft cup (disposable cervical cup) | The soft cup was worn during intercourse by 67 subjects in cycle 1, 61 in cycle 2, and 58 in cycle 3. Nine women reported discomfort, 13 partners reported discomfort.                                  |                                                                                                                                                                                                                                                                                                                                                                                                                                                             | North and Oldham 2011 <sup>14</sup>                    |

**Other use of MCs**

The cervical cup has been referenced as a possible product to allow intercourse while menstruating with potential as a contraceptive.<sup>29</sup> Vaginal cups have been used for the diagnosis, reduction or control of leakage from enterovaginal, vesicovaginal, or vesicouterine fistulae.<sup>32,37,47,48</sup>

## Section 2.1. Qualitative studies

### Study characteristics qualitative studies

Of the six studies identified with qualitative information, three were methodologically weak, one was satisfactory and two were judged as high quality (Table S6).<sup>24,25,41,49-51</sup> No studies were excluded due to the limited number; however, in recognition of the lack of robust evidence we selected findings that were evidenced in at least 3 of the 6 studies. The six studies (Table S7), all in developing countries, included a total of at least 225 participants (the study by Care International 2018,<sup>43</sup> did not report total number of participants taking part in the FGDs), although not all had received a cup;<sup>50,51</sup> 75 participants took part in an interview (described as in-depth interview or semi-structured or personal interview, 47.2% school girls) and a minimum of 193 were in 21 focus group discussions (FGDs, 72.5% school girls). Data were collected at 3-6 months after participants received a cup (not available for one study). Four studies described the participant selection strategy.<sup>41,49-51</sup> Two studies reported data triangulation and triangulation of analysis.<sup>49,51</sup>

**Table S7: CASP – Appraisal of qualitative studies**

|                              | Clear statement of aims | Qualitative Method appropriate | Will design address aims | Recruitment appropriate | Data collected to address issue | Relationship considered | Ethical issues considered | Data analysis rigorous | Clear statement of findings | How valuable is research | Overall quality |
|------------------------------|-------------------------|--------------------------------|--------------------------|-------------------------|---------------------------------|-------------------------|---------------------------|------------------------|-----------------------------|--------------------------|-----------------|
| Hyttel 2017 <sup>49</sup>    | Yes                     | Yes                            | Yes                      | Yes                     | Satisfactory                    | Cannot tell             | Yes                       | Satisfactory           | Yes                         | Strong                   | Medium          |
| Mason 2015 <sup>51</sup>     | Yes                     | Yes                            | Yes                      | Yes                     | Satisfactory                    | Satisfactory            | Yes                       | Satisfactory           | Yes                         | Strong                   | Strong          |
| Sundqvist 2015 <sup>50</sup> | Yes                     | Yes                            | Yes                      | Yes                     | Yes                             | Yes                     | Yes                       | Yes                    | Yes                         | Strong                   | Strong          |
| Tellier 2012 <sup>41</sup>   | Yes                     | Yes                            | Satisfactory             | Cannot tell             | Cannot tell                     | Cannot tell             | Cannot tell               | Cannot tell            | No                          | Weak                     | Weak            |
| APHRC 2010 <sup>24,25</sup>  | Yes                     | Yes                            | Yes                      | Cannot tell             | Cannot tell                     | Cannot tell             | Cannot tell               | Cannot tell            | No                          | Weak                     | Weak            |
| Care 2018 <sup>27</sup>      | Yes                     | Yes                            | Minimal                  | Cannot tell             | Cannot tell                     | Cannot tell             | Cannot tell               | Cannot tell            | No                          | Weak                     | Weak            |

**Table S8: Characteristics of Qualitative Papers**

| Author, year of publication                  | Country Time    | Sample                                      | Age Range (years)         | Study Design and comparison                                            | Duration of cup use | Data Collection Method                                                | Analysis Method   | Research topic / scope                         |
|----------------------------------------------|-----------------|---------------------------------------------|---------------------------|------------------------------------------------------------------------|---------------------|-----------------------------------------------------------------------|-------------------|------------------------------------------------|
| Hyttel 2017 <sup>49</sup>                    | Uganda 2013     | 36 schoolgirls                              | 13-17                     | Qualitative study within RCT. Cloths and single use pads               | 4 months            | 12 Interviews<br>4 FGDs                                               | Thematic analysis | Drivers of cup use<br>Challenges of MC use     |
| Mason 2015 <sup>51</sup>                     | Kenya 2012-2013 | 101 schoolgirls<br>64 parents               | 14-16<br>Parent age<br>NR | Qualitative study within RCT. Cloths, single use pads, other           | 6 months            | 10 girls FGDs*<br>6 parents FGDs*                                     | Thematic analysis | Experience of MC and pad use                   |
| Sundqvist 2015 <sup>50</sup>                 | Tanzania 2014   | 15 schoolgirls<br>9 parents*<br>4 teachers* | 14-15<br>Adult age<br>NR  | Qualitative study cup donation project. Cloths, single use pads, other | NR                  | 24 Semi structured interviews<br>1 FGD (4 teachers)                   | NR                | MC usefulness and impact on female empowerment |
| Tellier 2012 <sup>41</sup>                   | Uganda<br>NR    | 31 women                                    | 18-32                     | Pilot study – mixed methods. Cloths, single use pads                   | 3-5 months          | Semi structured interviews: 7 persons at baseline, 15 at follow up    | NR                | Acceptability and safety of MC use             |
| APHRC 2010 <sup>24,25</sup>                  | Kenya 2008      | 24 schoolgirls<br>17 women                  | NR                        | Mixed methods. Cloth, single use pads, cotton wool, tissue paper       | 4 months            | In-depth interviews: 24 girls baseline, 22 at 4 months, 17 women both | NR                | Attitudes and acceptability                    |
| Care International Uganda 2018 <sup>27</sup> | Uganda 2018     | NR                                          | 15-30<br>25 ≤18           | Mixed methods. Disposable and reusable pads, cloths                    | 3 months            | 7 FGDs, 3 “personal interviews”, both at endline                      | “Thematic coding” | Experience of using the MC and menstruation    |

FGD=Focus Group Discussion. MC: Menstrual cup. NR=not reported. \*Mason et al. (2015): 4 FGDs among cup users, and 2 FGDs among parents or teachers of girls who used cups.

### Description of qualitative results

Although a range of themes were evident within the studies we identified the following 6 themes as important, with evidenced in all or most of these studies with supporting quotations and / or author narrative: Initial apprehensions; Becoming accustomed; Resolving issues, restoring dignity; Challenges; Effect on schooling; Economic benefits. The first three themes provided the most material and numerous similar quotations and appeared to be stronger themes overall.

**Initial apprehensions:** Within this theme, subthemes arose around fear of the unknown, fear of the size, and fear of adverse events. All studies noted that participants frequently opined how shocked they were on viewing the cup for the first time, little realising how big it would be: *‘but first days when we saw it we thought – it is too big! It cannot fit!’* Many voiced concerns that it might

cause pain (and indeed noted that it did often do so at first) or even had potential to cause reproductive harm to the wearer. However, there was little or no evidence presented in these studies that this had much lasting effect in preventing participants from using a cup. Three studies additionally described members of the community also giving similar comments to the participants such as *'I still fear because they said that .....[the cup] had been brought to us so that girls don't produce'*).

**Becoming Accustomed:** All studies described ways in which girls became accustomed to wearing the cup with time, practice, peer support and training being key to successful use. *'The first time, I found it difficult and ... I came back to use pads. Then another month began. I tried [the cup] and felt like my waist was paralyzed. I then used it and the next day I used it and I then found using it became easy and I now use it.'*

Noted in 3 of the studies, peer support appeared important in overcoming this barrier, with quotes suggesting that having peers describe cup usage in positive terms, or sharing ways of inserting / wearing, would encourage struggling participants to try and master usage for themselves. *'In the beginning I was fearing but my friend also told me just pick it, maybe you will like it later...My friend said I am even using it and I am so free, so I decided to use it. If not, I would have been waiting'*. It appeared that information provided in cup training particularly by those teachers / researchers who used the cup themselves, may also have had a positive effect in supporting and encouraging participants to resolve any issues, although there was minimal supporting quotations provided within the papers.

**Resolving Issues, Restoring Dignity:** Within this theme 3 key subthemes were apparent, leakage, comfort (also seen as health benefits), and feeling 'free' – these going some way to reduce the shame and embarrassment and isolation that menstruating girls and women suffered from. There were frequent positive quotations suggesting that the menstrual cup was a solution to problems they frequently faced during menstruation which included leakage, staining of clothes and on occasion dropping of the absorbent which resulted in embarrassment or shame). All studies evidenced participants describing leakage as a problem which was resolved when using a cup. They described relief from constant worry that their clothes would be stained, or the need to keep checking this did not happen, which appeared to be the norm with traditional items and even with sanitary pads. *'You feel free, unlike pads, because pads you have to check all the time..... you even sleep freely, no problems with anything'*. Comfort was also repeatedly described as a benefit that participants observed when using a cup in comparison to their experience with alternatives. Recurring comments stemmed around the inability to feel it once inserted correctly, whilst there was also occasional comparison with pain, discomfort or bruising or itching that can occur with a pad or cloth, hence also being also termed 'health benefits'. Feeling 'free' from the physical restrictions of wearing a pad or a cloth also appeared to be another positive outcome reported around cup use as it gave participants liberty to undertake physical activities that were restricted or impossible when using other forms of menstrual protection such as bike riding, playing, running etc. *'It was as if I am not on my period...[The cup] doesn't leak, it is comfortable and I can even bike. It doesn't hurt like disposable pads, where sometimes I wouldn't feel like even asking. Now I am free to do whatever I want and walk and bike as long as I want'*. However, freedom also came from the lack of worry, such as not having to constantly check for leakage.

**Challenges:** A range of challenges were evidenced in relation to using a cup. Three of the studies described some difficulties with cleaning and storing of the cup, these included finding a suitable container in which to boil the cup, having to ensure that cleaning is done in private as well as keeping the cup safe from rats or being stolen in between menses. Other challenges related to having water to wash the cup, changing the cup, notably in school or public toilets in the event of a queue or with minimal time, and also at night where security was an issue. *'it would be tricky going to empty the cup in the public toilets especially when you are travelling and maybe there is a queue, someone is banging on the door for you to finish quickly, and in the process of hurrying, it can easily drop in the toilet'*.

**Effect on Schooling:** The influence that cup use had on school attendance was described in 3 studies with the implication that attendance was improved since participants received a cup. *'That thing is also good because let's say you are using pads and then the pads gets finished before you have finished your periods and there is no money to buy more so for you, you will stay at home but school continues normally; You stay at home because you fear the leaking, that is where I find the difficulty'* The same studies also reported on the improvement in concentration and freedom from worry which may in turn improve performance and these were linked to the subthemes described above of reduced leakage, comfort and feeling free.

**Economic Advantage:** Lastly, the economic advantage of having a cup emerged as a finding in 4 of the studies, with participants (and families) happy not to have to spend or 'waste' money each month on a pad or soap for washing cloths. It gave them the opportunity to purchase other essentials. In some cases, this appeared to be a key incentive in adopting up usage despite initial fears. Just one study included a participant quote illustrating that it also reduced the need for transactional sex to purchase pads.

**Table S9. Themes in qualitative studies**

| Theme                                  | Source Text                                                                                                                                                                                                                                                                                                                                                                                                                                                                                                                                                                                                                                                                                                                                                                                                                                                                                           | Studies           |
|----------------------------------------|-------------------------------------------------------------------------------------------------------------------------------------------------------------------------------------------------------------------------------------------------------------------------------------------------------------------------------------------------------------------------------------------------------------------------------------------------------------------------------------------------------------------------------------------------------------------------------------------------------------------------------------------------------------------------------------------------------------------------------------------------------------------------------------------------------------------------------------------------------------------------------------------------------|-------------------|
| Initial apprehension                   | <p>‘In the beginning I was fearing but my friend also told me just pick it maybe you will like it later..... I also talked to other girls myself, who feared trying it. All I know are now using it.’<sup>41</sup></p> <p>‘When they distributed the cup I also feared much. My younger sister inserted the thing first, and then I asked her whether it is painful. She replied yes it is painful. I then said if it is painful I will not insert it, but I then took courage and inserted it.’<sup>49</sup></p>                                                                                                                                                                                                                                                                                                                                                                                     | 24,25,41,49-51    |
| The unknown                            | <p>‘I thought it was a strange thing, I had never seen it before. I had never heard about it [...] I felt it was very strange.’<sup>50</sup></p> <p>‘but first days when we saw it we thought – it is too big! It cannot fit!’<sup>51</sup></p>                                                                                                                                                                                                                                                                                                                                                                                                                                                                                                                                                                                                                                                       |                   |
| Size                                   | <p>‘We like [the cup] but when we had just received it and went home with it our mothers were saying that thing will destroy our uterus; it is big, it will widen our female organ and enlarge our uterus.’<sup>51</sup></p>                                                                                                                                                                                                                                                                                                                                                                                                                                                                                                                                                                                                                                                                          |                   |
| Fear of adverse events                 | <p>‘A certain woman told me not to use that thing because it can prevent me from giving birth in future.’<sup>51</sup></p> <p>‘I still fear because they said that [the cup] had been brought to us so that girls don’t produce.’<sup>49</sup></p>                                                                                                                                                                                                                                                                                                                                                                                                                                                                                                                                                                                                                                                    |                   |
| Becoming Accustomed                    | <p>‘I felt pain, then I said to myself ‘this thing is difficult to insert’ then I said again, ‘no, I heard people talking that it is good’, so I went to try again. So from that day up to now I have been using it.’<sup>51</sup></p>                                                                                                                                                                                                                                                                                                                                                                                                                                                                                                                                                                                                                                                                | 24,25,41,49-51    |
| Peer experience                        | <p>‘In the beginning I was fearing, but my friend also told me just pick it, maybe you will like it later...My friend said I am even using it and I am so free, so I decided to use it. If not I would have been waiting. I also talked to other girls myself, who feared trying it. All I know are now using it.’<sup>41</sup></p>                                                                                                                                                                                                                                                                                                                                                                                                                                                                                                                                                                   |                   |
| Practice                               | <p>‘The first time, I found it difficult and...I can back to use pads. Then another month began. I tried [the cup] and felt like my waist was paralysed. I then use it and the next day I used it and I then found using it became easy and I now use it.’<sup>49</sup></p> <p>‘Why I felt that that that thing is good was because of how they explained; how to fold, insert, all made me feel that using it is easy and I joined and received it.’<sup>49</sup></p>                                                                                                                                                                                                                                                                                                                                                                                                                                |                   |
| Training & support                     | <p>‘If she says [the cup] is difficult to use, you tell her that she should try it this way. You tell her how you tried and that is why you got used to it.’<sup>49</sup></p> <p>‘I thought I had to try to because during the education they said that it can feel weird in the beginning but if you repeat and repeat it is better. So I was thinking, I should repeat and repeat and then it started feeling fine.’<sup>50</sup></p>                                                                                                                                                                                                                                                                                                                                                                                                                                                               |                   |
| Resolving Issues, Restoring Dignity    | <p>‘Because when you put the cup, the blood cannot come out. But with the pad, it can move aside so you get blood on the outside, you get dirty and feel ashamed.’<sup>50</sup></p>                                                                                                                                                                                                                                                                                                                                                                                                                                                                                                                                                                                                                                                                                                                   | 24,25,27,41,49-51 |
| Leakage                                | <p>‘It has helped me because before if I use [brand] sometimes I could find blood stain on my clothes and you know that is embarrassment, but since the Mooncup was brought, if I insert it I just feel free and do not even have it in my mind...’<sup>51</sup></p> <p>‘...in class you are not worried that you will spot and people will know that you are menstruating. It doesn’t leak and I no longer have to keep running to the toilet to change.’<sup>25</sup></p> <p>‘it collects all the blood inside and it doesn’t leak like when you are using the pad, which you have to keep changing, otherwise it leaks.’<sup>49</sup></p>                                                                                                                                                                                                                                                          |                   |
| Comfort / health                       | <p>‘You will also avoid itching because of the dryness.’<sup>25</sup></p> <p>‘Because it doesn’t give bruises or blisters. You feel more comfortable, you feel free.’<sup>50</sup></p> <p>‘[using the cup] is so much more easy. When pads have been there for long, it gets too warm, and uncomfortable. It was as if I am not in my period..[The cup] doesn’t leak, it is comfortable and I can even bike. It doesn’t hurt like disposable pads, where sometimes I wouldn’t feel like walking. Now I am free to do whatever I want, and walk and bike as long as I want.’<sup>41</sup></p> <p>‘It is good because you cannot get skin rashes, unlike pads, after using you will have irritations and maybe bruises, but Mooncup does not.’<sup>51</sup></p> <p>‘You are very comfortable and you can do so many things with the cup on. You will walk freely with your head high.’<sup>25</sup></p> |                   |
| Freedom                                | <p>‘I feel free, unlike pads, because you have to check all the time, you also cannot drive your bike. Now I can drive my bike and I don’t have to look back, I don’t fear, now I can stay for a long time at gatherings. You even sleep freely, no problems with anything.’<sup>41</sup></p> <p>‘I’m feeling good because when I put that Mooncup inside I can run, I can do anything.’<sup>51</sup></p> <p>I found using it was interesting and easy because once you have inserted it you can play so freely you will not feel that there is something in your body.’<sup>49</sup></p>                                                                                                                                                                                                                                                                                                             |                   |
| Challenges                             | <p>‘At school there are times when there is no water and during those times I don’t remove my cup at all until I reach home. Because I need water to pour in the toilet and also to rinse the cup with because I cannot leave the toilet like that.’<sup>25</sup></p>                                                                                                                                                                                                                                                                                                                                                                                                                                                                                                                                                                                                                                 | 24,25,27,41,49    |
| Water / cleaning / security / changing | <p>‘In Korogocho you cannot go out at night so I have a plastic container that I use. I pour the menstrual blood in it, rinse the cup with water and use it again. In the morning I can go and pour that waste in the toilet and then wash the container.’<sup>25</sup></p> <p>‘there was a problem of getting a tin for boiling.’<sup>49</sup></p> <p>‘I received re-usable pads but because they required so much water, my grandmother, who I live with, discouraged me from using them because they were wasting the little water we had’<sup>27</sup></p>                                                                                                                                                                                                                                                                                                                                        |                   |

|                                                                          |                                                                                                                                                                                                                                                                                                                                                                                                                                                                                                                                                                                                                                                                                                                                                                                                                                                                                                                                                                                                                  |                   |
|--------------------------------------------------------------------------|------------------------------------------------------------------------------------------------------------------------------------------------------------------------------------------------------------------------------------------------------------------------------------------------------------------------------------------------------------------------------------------------------------------------------------------------------------------------------------------------------------------------------------------------------------------------------------------------------------------------------------------------------------------------------------------------------------------------------------------------------------------------------------------------------------------------------------------------------------------------------------------------------------------------------------------------------------------------------------------------------------------|-------------------|
|                                                                          | <p>'Some people...they understand that it is used like this, so that they get a day and steal it, and indeed for some people [their cup] was stolen because they explained it all.'<sup>49</sup></p>                                                                                                                                                                                                                                                                                                                                                                                                                                                                                                                                                                                                                                                                                                                                                                                                             |                   |
| <p>Effect on Schooling Attendance</p> <p>Performance / concentration</p> | <p>'My periods used to come so much that it would even prevent me from coming to school. When I used that cup I found it was good because once it is full I would know and go and change. Even now I stay freely among my friends.'<sup>49</sup></p> <p>'It can improve their performance because they will now concentrate more on their studies, not on how she will manage her periods because sometimes the teacher is busy teaching and she is just thinking about periods.'<sup>51</sup></p> <p>'I won't have to keep on checking and being worried that it might leak, unlike the pad which I have to be checking all the time. I will be able to concentrate in class. This will really help.'<sup>25</sup></p> <p>'Before I got the cup I found it really difficult when I was in my period to go to school. I really feared shame if I was seated and the blood can smell. Really I had that fear. But since I received the cup I can put in the cup and it can just hold the blood.'<sup>27</sup></p> | 24,25,49,51       |
| Economic Benefits                                                        | <p>'I had a lot of fear in the beginning, but I kept on using it because I could see that it was a smart and cheap solution.'<sup>41</sup></p> <p>'I used to spend 5,000 Ugandan shilling for pads, now I can spend it on something else, I am so happy for that.'<sup>41</sup></p> <p>'That cup I liked it because they said it will last for 10 years, so I felt that for the 10 years, it will help us not to waste money.'<sup>49</sup></p> <p>'You will save costs of water and soap.'<sup>25</sup></p> <p>'When I [attended] the education of the cup I was thinking that the pads are expensive for me and that the cup will not be expensive for me, so I thought it's better to learn to use it and save money.'<sup>50</sup></p> <p>Since the project started I now feel comfortable because when I use the cup, instead of thinking where I'm going to get money to buy pads, I am using the cup and the cup is really helping me'<sup>27</sup></p>                                                   | 24,25,27,41,49,50 |

## Section 2.2 Acceptability

**Figure S1. Proportion of participants with menstrual cup leakage in twelve studies, by economic status of the country**

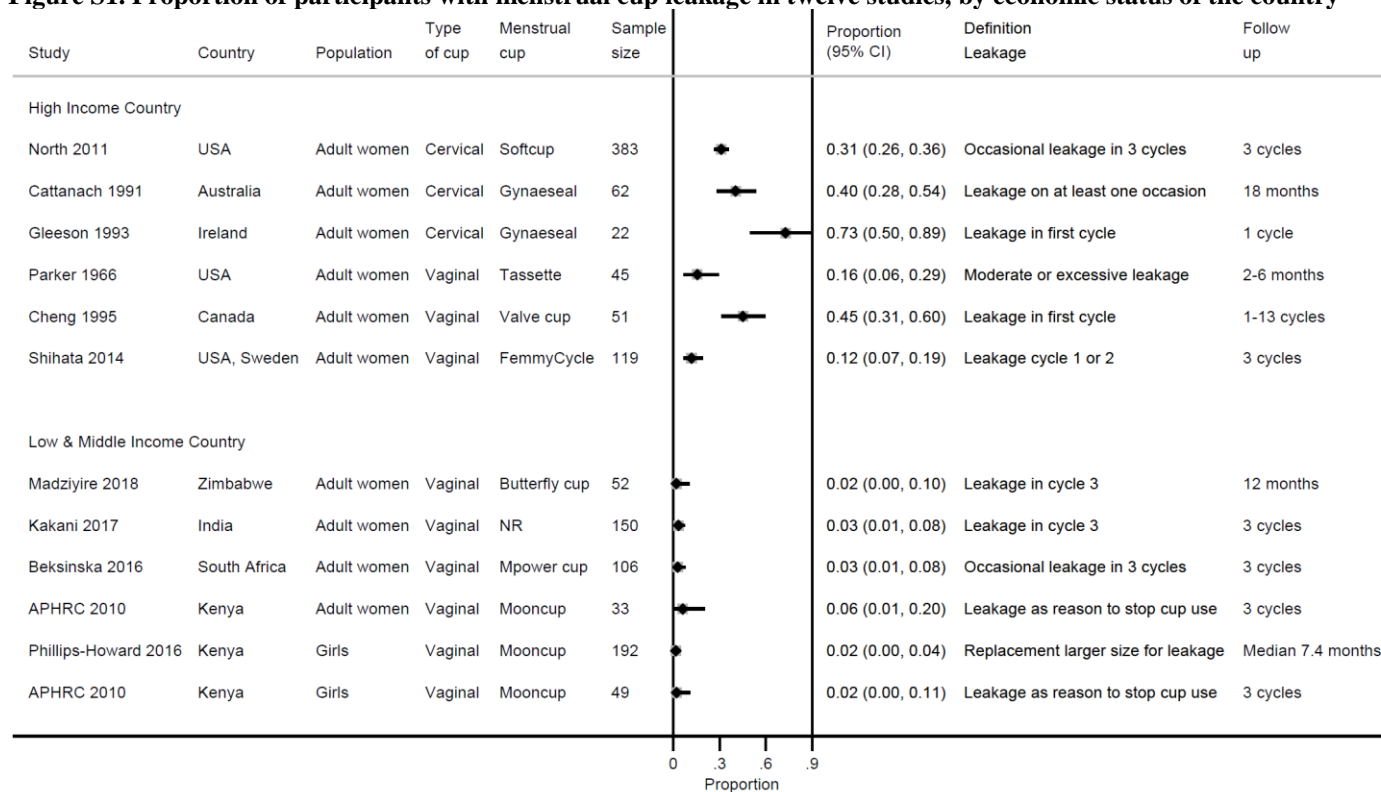

Note: Past and current menstrual cups. In the study by Cheng et al. (1995), a vaginal cup with a valve in the stem was used.<sup>30</sup> Leakage during menstrual cup use was reported in various ways; eleven studies with twelve data points provided information (1264 participants)

**Table S10. Use of menstrual cup, product related discontinuation and other loss to follow up**

| Study                                                                    | Cup brand (type)               | Follow up time with cup use                | Could not insert cup n/N (%)                                        | Used cup at least once (verbal report documented) n/N (%)              | Cup-related discontinuation n/N (%)§                                  | Loss to follow up for other (or unclear) reasons n/N (%)             |
|--------------------------------------------------------------------------|--------------------------------|--------------------------------------------|---------------------------------------------------------------------|------------------------------------------------------------------------|-----------------------------------------------------------------------|----------------------------------------------------------------------|
| APHCR 2010 <sup>24</sup> (girls)                                         | Mooncup (vaginal)              | 3 cycles                                   | 6/60 (10.0)                                                         | 49/60 (81.7)                                                           | 14/60 (23.3)                                                          | 5/60 (8.3)                                                           |
| APHCR 2010 <sup>24</sup> (women)                                         | Mooncup (vaginal)              | 3 cycles                                   | 2/36 (5.6)                                                          | 33/36 (91.7)                                                           | 3/36 (8.3)                                                            | 1/36 (2.8)                                                           |
| Beksinska 2016 <sup>13</sup>                                             | Mpower (vaginal)               | 3 cycles                                   | NR                                                                  | 99/110 (90.0)                                                          | NR                                                                    | 5/110 (4.5)                                                          |
| Care International 2018 <sup>43</sup>                                    | Ruby cup (vaginal)             | 3 cycles                                   | NR                                                                  | 84/100 (84.0)                                                          | NR                                                                    | NR                                                                   |
| Cattanach 1991 <sup>29</sup>                                             | Gynaeseal (cervical)           | 18 months                                  | 7/80 (8.8) ‖                                                        | 73/80 (91.3) ‖                                                         | NR                                                                    | NR                                                                   |
| Cheng 1995 <sup>30</sup>                                                 | Menses Cup, Shanghai (vaginal) | 1-13 months (22/51 [43%] stopped after c1) | 0/51 (0.0)                                                          | 51/51 (100.0)                                                          | 43/51 (84.3)                                                          | NR                                                                   |
| Chintan 2017 <sup>31</sup>                                               | Flowcare (vaginal)             | 8 weeks                                    | NR                                                                  | NR                                                                     | NR                                                                    | NR                                                                   |
| Femme International <sup>2†</sup> (girls site 1)                         | Ruby cup (vaginal)             | 6 months                                   | 12/113 (10.6)                                                       | 73/113 (64.6)                                                          | NR                                                                    | NR                                                                   |
| Femme International <sup>2†</sup> (girls site 2)                         | Ruby cup (vaginal)             | 12 months                                  | NR                                                                  | 24/31 (77.4)                                                           | NR                                                                    | NR                                                                   |
| Femme International <sup>2†</sup> (girls site 3)                         | Ruby cup (vaginal)             | 6 months                                   | NR                                                                  | 17/40 (43.6)                                                           | NR                                                                    | NR                                                                   |
| Femme International <sup>2†</sup> (women site 1)                         | Ruby cup (vaginal)             | 12 months                                  | NR                                                                  | 2/60 (3.3)                                                             | NR                                                                    | NR                                                                   |
| Femme International <sup>2†</sup> (women site 2)                         | Ruby cup (vaginal)             | 6 months                                   | NR                                                                  | 23/41 (56.1)                                                           | NR                                                                    | NR                                                                   |
| Gleeson 1993 <sup>34</sup>                                               | Gynaeseal (cervical)           | 1 cycle                                    | 1/22 (4.5)                                                          | 21/22 (95.5)                                                           | NR                                                                    | NR                                                                   |
| Hoffmann 2014 <sup>19*</sup>                                             | NR (vaginal)                   | 8 months                                   | NR                                                                  | 2 months:<br>random 57/174 (32.8)<br>choice 22/46 (47.8)               | NR                                                                    | 2 months:<br>random 21/174 (12.1)<br>choice 0/46 (0.0)               |
| Howard 2011 <sup>12</sup>                                                | Divacup (vaginal)              | 3 cycles                                   | NR                                                                  | 54/56 (96.4)                                                           | 1/56 (1.8)                                                            | 8/56 (14.3)                                                          |
| Kakani 2017 <sup>35</sup>                                                | NR (vaginal)                   | 3 cycles                                   | 2/158 (1.3)                                                         | 156/158 (98.7)                                                         | 6/158 (3.8)                                                           | 4/158 (2.5)                                                          |
| Madziyire 2018 <sup>3</sup>                                              | Butterfly cup (vaginal)        | 3 cycles                                   | 0/54 (0.0)                                                          | 54/54 (100.0)                                                          | 1/54 (1.9) Husband refused                                            | 1/54 (1.9)                                                           |
| North 2011 <sup>14</sup>                                                 | Softcup (cervical)             | 3 cycles                                   | 4/406 (1.0)                                                         | 368/406 (90.6)                                                         | 24/406 (5.9)                                                          | 74/406 (18.2)                                                        |
| Oster 2009 (report 14853) <sup>20</sup>                                  | Mooncup (vaginal)              | 15 months                                  | NR                                                                  | 59/98 (60.2)                                                           | 1/98 (1.0)                                                            | 0/98 (0.0)                                                           |
| Parker 1966 <sup>37</sup>                                                | Tassette (vaginal)             | 2-6 months                                 | NR                                                                  | 46/46 (100.0)                                                          | NR                                                                    | NR                                                                   |
| Pena 1962 <sup>38</sup>                                                  | Tassette (vaginal)             | 3 cycles                                   | 0/125 (0.0)                                                         | 125/125 (100.0)                                                        | 0/125 (0.0)                                                           | 0/125                                                                |
| van Eijk 2018 <sup>32</sup> (part of Phillips-Howard 2016 <sup>1</sup> ) | Mooncup (vaginal)              | median 7.4 months, range 1-14              | NR                                                                  | 187/229 (81.7)                                                         | NR                                                                    | 41/229 (17.9)                                                        |
| Shihata 2014 <sup>39</sup>                                               | FemmyCycle (vaginal)           | 3 cycles                                   | 6/146 (4.1)                                                         | 125/146 (85.6)                                                         | 36/146 (24.7)                                                         | 5/146 (3.4)                                                          |
| Stewart 2010 <sup>40</sup>                                               | Mooncup (vaginal)              | 3 cycles                                   | NR                                                                  | 26/54 (48.1)                                                           | NR                                                                    | 33/54 (61.1)                                                         |
| Tellier 2012 <sup>41</sup>                                               | Ruby cup (vaginal)             | 3-5 cycles                                 | NR                                                                  | 15/31 (48.4)                                                           | NR                                                                    | 16/31 (51.6)                                                         |
| <b>Pooled prevalence‡, 95% CI</b>                                        |                                |                                            | <b>2.8%, 0.8-5.6%, I<sup>2</sup> 79.3%, n=11, 1251 participants</b> | <b>79.3%, 68.5-88.4%, I<sup>2</sup> 97.1%, n=25, 2367 participants</b> | <b>10.2%, 2.7-22.6%, I<sup>2</sup> 96.4%, n=10, 1190 participants</b> | <b>9.0%, 3.8-15.9%, I<sup>2</sup> 94.9%, n=15, 1783 participants</b> |

NR=not reported.

\* Cross-over of menstrual cup and pad users possible after 2 months in the study. Random: these participants were randomized to receive the menstrual cups. Choice: these women obtained the menstrual cup by choice.

† Monitoring and evaluation of distribution program in Tanzania in Kilimanjaro region;<sup>2</sup> 2 girls were not allowed a menstrual cup and 5 girls reported to have lost the menstrual cup

‡ For forest plots see Figures S7-S10

§ Reasons for cup-related discontinuation: Cheng 1995: (cup with drainage tube that can be unplugged) too long (29%), difficult to insert or position (25%), uncomfortable (25%), messy to unplug (17%), difficult to use during light flow (4%). Femme international: main reasons fear, difficulty inserting and pain.<sup>30</sup> Kakani 2017: feeling messy (2 women), could not insert cup (2), difficult removal (2).<sup>35</sup> North 2011: poor fit (11 women), messy (4), cramping (4), difficult removing (4), didn't like it (3).<sup>14</sup> Oster 2009: one girl did not like the MC.<sup>20</sup> Shihata 2014: (no numbers available): device too big, variable degrees of prolapse of cervix, not able or wanting to insert.<sup>39</sup>‖ 80 responders among 259 women approached by (slow) mail after 18 months.<sup>29</sup>



**Table S11. Acceptability of the menstrual cup among women who tried the MC**

| Study                                                    | Cup brand (type)               | Follow up time (cup use)                                     | Difficult to insert (%)                                                                                 | Uncomfortable to wear (%)                                                                                                                                              | Difficult to remove (%)                                                   | Overall evaluation                                                                        |
|----------------------------------------------------------|--------------------------------|--------------------------------------------------------------|---------------------------------------------------------------------------------------------------------|------------------------------------------------------------------------------------------------------------------------------------------------------------------------|---------------------------------------------------------------------------|-------------------------------------------------------------------------------------------|
| APHCR 2010 <sup>24</sup> (girls)                         | Mooncup (vaginal)              | 3 cycles                                                     | 14/49 (28.6)                                                                                            | 3/49 (6.1)                                                                                                                                                             | NR                                                                        | NR                                                                                        |
| APHCR 2010 <sup>24</sup> (women)                         | Mooncup (vaginal)              | 3 cycles                                                     | 2/33 (6.1)                                                                                              | 2/33 (6.1)                                                                                                                                                             | NR                                                                        | NR                                                                                        |
| Beksinska 2016 <sup>13</sup>                             | Mpower (vaginal)               | 3 cycles                                                     | 4/106 (3.8) c3                                                                                          | 21/106 (19.8) c3                                                                                                                                                       | 4/106 (3.8) c3                                                            | 97% cup better than other methods, 3% cup worse                                           |
| Care International 2018 <sup>27</sup>                    | Ruby cup (vaginal)             | 3 cycles                                                     | NR                                                                                                      | NR                                                                                                                                                                     | NR                                                                        | 15/16 (93.8%) very satisfied                                                              |
| Cattanach 1991 <sup>29</sup>                             | Gynaeseal (cervical)           | 18 months                                                    | 13/73 (17.8)                                                                                            | NR                                                                                                                                                                     | 12/73 (16.4)                                                              | Compared to tampons: 31/62 (50.0%) thought it better, 9/62 (14.5%) thought it worse       |
| Cheng 1995 <sup>30</sup>                                 | Menses Cup, Shanghai (vaginal) | 1-13 months (22/51 or 43% stopped after c1)                  | 23/51 (45.1) c1                                                                                         | 32/51 (62.7) c1                                                                                                                                                        | 0/51 (0.0) c3                                                             | 18/51 (35%) thought cup acceptable                                                        |
| Chintan 2017 <sup>31</sup>                               | Flowcare (vaginal)             | 8 weeks                                                      | 65/100 (65.0) c1                                                                                        | NR                                                                                                                                                                     | NR                                                                        | 43% cup better, 21% previous item better                                                  |
| Femme International <sup>2†</sup> (girls site 1)         | Ruby cup (vaginal)             | 6 months                                                     | 13/113 (11.5)                                                                                           | NR                                                                                                                                                                     | NR                                                                        | NR                                                                                        |
| Femme International <sup>2†</sup> (girls site 2)         | Ruby cup (vaginal)             | 12 months                                                    | 2/31 (6.5)                                                                                              | NR                                                                                                                                                                     | NR                                                                        | NR                                                                                        |
| Femme International <sup>2†</sup> (girls site 3)         | Ruby cup (vaginal)             | 6 months                                                     | 8/40 (20.0)                                                                                             | NR                                                                                                                                                                     | NR                                                                        | NR                                                                                        |
| Femme International <sup>2†</sup> (women site 1)         | Ruby cup (vaginal)             | 12 months                                                    | 5/7 (71.4)                                                                                              | NR                                                                                                                                                                     | NR                                                                        | NR                                                                                        |
| Femme International <sup>2†</sup> (women site 2)         | Ruby cup (vaginal)             | 6 months                                                     | 2/29 (6.9)                                                                                              | NR                                                                                                                                                                     | NR                                                                        | NR                                                                                        |
| Gleeson 1993 <sup>34</sup>                               | Gynaeseal (cervical)           | 1 cycle                                                      | 1/22 (4.5) c1                                                                                           | NR                                                                                                                                                                     | 1/21 (4.8)                                                                | NR                                                                                        |
| Hoffmann 2014 <sup>19</sup>                              | NR (vaginal)                   | 8 months                                                     | NR                                                                                                      | randomized: 11/151 (7.3) 8 months choice: 1/46 (2.2) 2 months                                                                                                          | NR                                                                        | Preference of cup to baseline method: 2 months 43/153 (28.1), 6 months 59/144 (41.0)      |
| Howard 2011 <sup>12</sup>                                | Divacup (vaginal)              | 3 cycles                                                     | Insertion: Likert scale 1-7*: cup 4.9 vs. tampon 5.2                                                    | Wear: Likert scale 1-7*: cup 5.5 vs. tampon 5.3<br><br>vaginal discomfort ≥1 day in c1-c3: cup 23/45 (51.1%) vs. tampon 12/44 (27.3%), p=0.02<br>cycle 3: 7/45 for cup | Removal: Likert scale 1-7*: cup 5.0 sd 1.4, vs. tampon 5.5 sd 1.1, p=0.06 | Mean satisfaction score: Likert scale 1-7*: cup 5.4 sd 1.5 vs. tampon 5.0, sd 1.0, p=0.04 |
| Kakani 2017 <sup>35</sup>                                | NR (vaginal)                   | 3 cycles                                                     | 15/150 (10.0) c3                                                                                        | 10/150 (6.7) c3<br>Dryness: 5/150 (3.3)                                                                                                                                | 8/150 (5.3)                                                               | NR                                                                                        |
| Madziyire 2018 <sup>3</sup>                              | NR (vaginal)                   | 3 cycles                                                     | 10/54 (0.0) c1, 1/53 in c2, 0/52 in c3                                                                  | 10/54 c1, 2/53 c2, 0/52 (0.0) c3                                                                                                                                       | NR                                                                        | 52/54 willing to use after c3                                                             |
| North 2011 <sup>14</sup>                                 | Softcup (cervical)             |                                                              | average of 8†                                                                                           | average of 8†                                                                                                                                                          | average of 8†                                                             | ~37% cup better than previous methods, 29% cup worse after c3‡                            |
| North 2011 <sup>14</sup> Manufacturer database 2003-2008 | Softcup (cervical)             | Unknown. Estimate manufacturer: 1 complaint/47,000 cups sold | 104 (no denominator)                                                                                    | 67 (moves when worn) (no denominator)                                                                                                                                  | 108 (no denominator)                                                      | NA                                                                                        |
| Oster 2011 <sup>22</sup>                                 | Mooncup (vaginal)              | 15 months                                                    | NR                                                                                                      | NR                                                                                                                                                                     | NR                                                                        | NR                                                                                        |
| Parker 1966 <sup>37</sup>                                | Tassette (vaginal)             | 2-6 months                                                   | 22/45 (48.9)                                                                                            | 19/45 (42.2)                                                                                                                                                           | 9/45 (20.0) "messy"                                                       | 23/45 (51.1) preferred cup to previous method                                             |
| Pena 1962 <sup>38</sup>                                  | Tassette (vagina)              | 3 cycles                                                     | NR                                                                                                      | 6/125 (4.8) slight discomfort in beginning                                                                                                                             | NR                                                                        | NR                                                                                        |
| Van Eijk 2018 <sup>52</sup>                              | Mooncup (vaginal)              | median 7.4 months, range 1-14                                | <3 months: 27/143 (18.9), 3-5 months: 13/143 (9.1)**,<br>6-8 months: 7/104 (6.7), 9+ months: 2/74 (2.7) | NR                                                                                                                                                                     | NR                                                                        | NR                                                                                        |
| Shihata 2014 <sup>39§</sup>                              | FemmyCycle (vaginal)           | 3 cycles                                                     | NR                                                                                                      | 17/105 (16.2)                                                                                                                                                          | NR                                                                        | 88/105 (83.8) satisfied with menstrual cup                                                |
| Stewart 2010 <sup>40</sup>                               | Mooncup (vaginal)              | 3 cycles                                                     | NR                                                                                                      | NR                                                                                                                                                                     | NR                                                                        | NR                                                                                        |

|                                      |                    |            |                                                                                |                                                                              |                                                                           |    |
|--------------------------------------|--------------------|------------|--------------------------------------------------------------------------------|------------------------------------------------------------------------------|---------------------------------------------------------------------------|----|
| Tellier 2012 <sup>41</sup>           | Ruby cup (vaginal) | 3-5 cycles | 5/15 (33.3)                                                                    | NR                                                                           | 7/15 (46.7)                                                               | NR |
| <b>Pooled prevalence, 95% CI, ††</b> |                    |            | <b>20.3%, 11.7-30.4%,<br/>I<sup>2</sup> 92.3%, n=17,<br/>1061 participants</b> | <b>12.6%, 5.9-21.3%,<br/>I<sup>2</sup> 91.9%, n=12,<br/>958 participants</b> | <b>9.3%, 2.9-18.3%<br/>I<sup>2</sup> 84.7%, n=7,<br/>461 participants</b> |    |

Abbreviations: c1=cycle 1 (first menstrual period with cup use). c2=menstrual cycle 2. c3=menstrual cycle 3. NA=not applicable. NR=not reported. Sd=standard deviation.

\* Scale of -7 with 1 as terrible and 7 as terrific

† Scale of 1-10 with 1 as poor and 10 as great

‡ Estimated from Figure 2 in publication, no numbers available

§14 women were removed from initial sample after cycle 2 because of leaking problems due to variable degrees of prolapse or low cervix

\*\* This information was used in meta-analysis

†† For forest plots see S11-S13

**Table S12. Information on mobility and odour when using a menstrual cup**

| Study                       | Menstrual Cup type   | Follow up time (cup use) | Improved Mobility                                        | Less Odour                                                 |
|-----------------------------|----------------------|--------------------------|----------------------------------------------------------|------------------------------------------------------------|
| North 2011 <sup>14</sup>    | Softcup (cervical)   | 3 cycles                 | ~51% cup better than previous method, 3% cup worse (c3)§ | ~41% cup better than previous method, 12% cup worse (c3) § |
| Oster 2012 <sup>23</sup>    | Mooncup (vaginal)    | 15 months                | convenient for mobility<br>14/97 (14.0)                  | NR                                                         |
| Parker 1966 <sup>37</sup>   | Tassette (vaginal)   | 2-6 months               | 35/45 (77.8)                                             | Absent odour in 42/46 (91.3)                               |
| Pena 1962 <sup>38</sup>     | Tassette (vaginal)   | 3 cycles                 | NR                                                       | "often reported" (No numbers)                              |
| Shihata 2014 <sup>39*</sup> | FemmyCycle (vaginal) | 3 cycles                 | 101/105 (96.2)<br>excellent mobility                     | 97/105 (92.4) excellent odour prevention                   |

\*First author of Shihata 2014 is patent holder on FemmyCycle<sup>53</sup>

NR – not reported

**Figure S2. Proportion of women who reported they could not insert the menstrual cup, studies between 1960 and 2017**

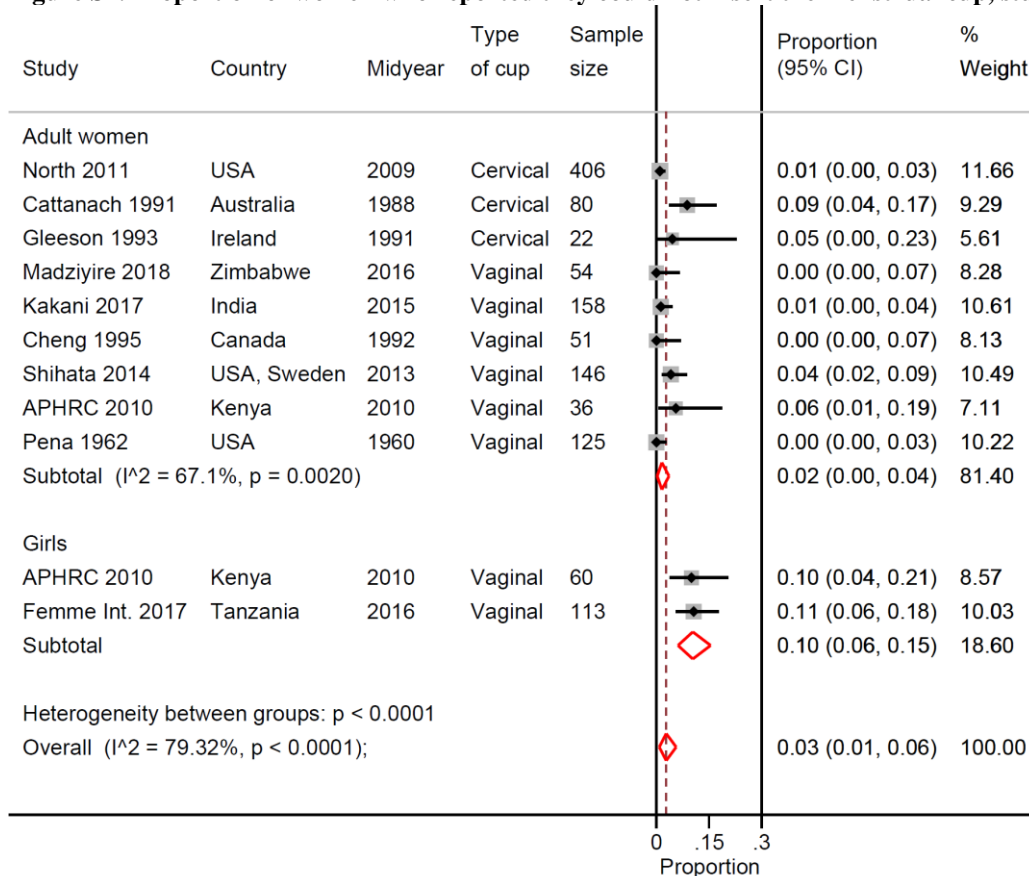

**Figure S3. Proportion of women who reported they used the menstrual cup at least once, studies between 1960 and 2017**

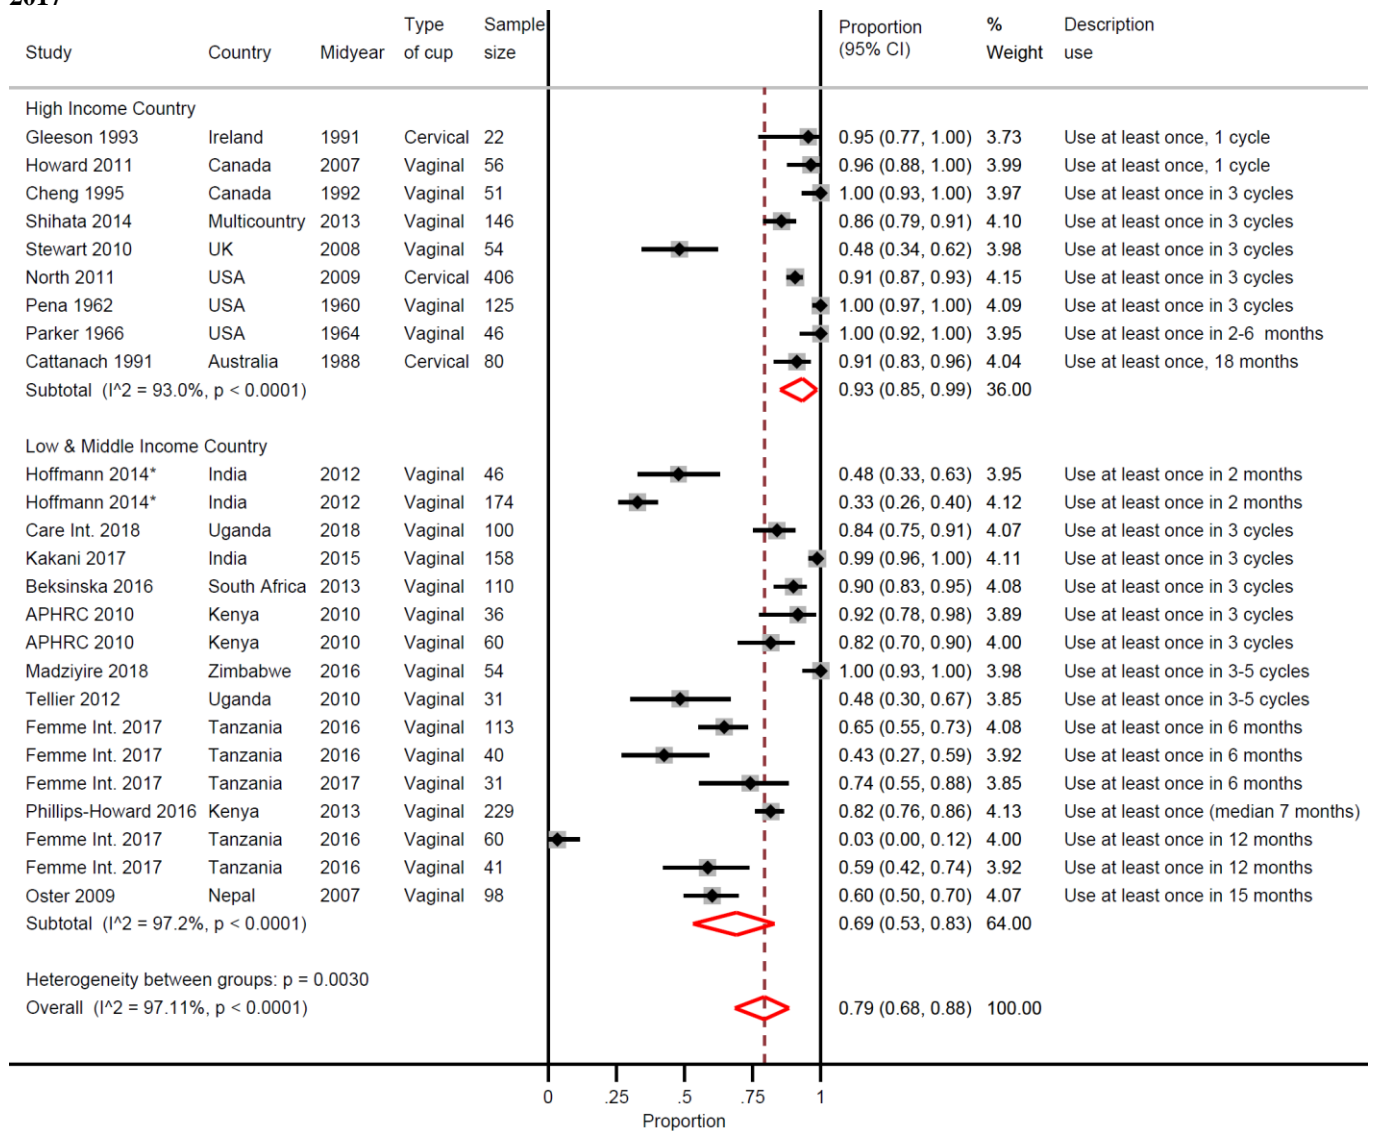

Cattanach 1991: 80 women who responded among 259 approached women by slow mail after 18 months<sup>29</sup>

\*Hoffmann 2014: n=46: women who got MC by choice, n=174: women who received MC by randomization<sup>19</sup>

**Figure S4. Menstrual cup related discontinuation, studies between 1960 and 2017**

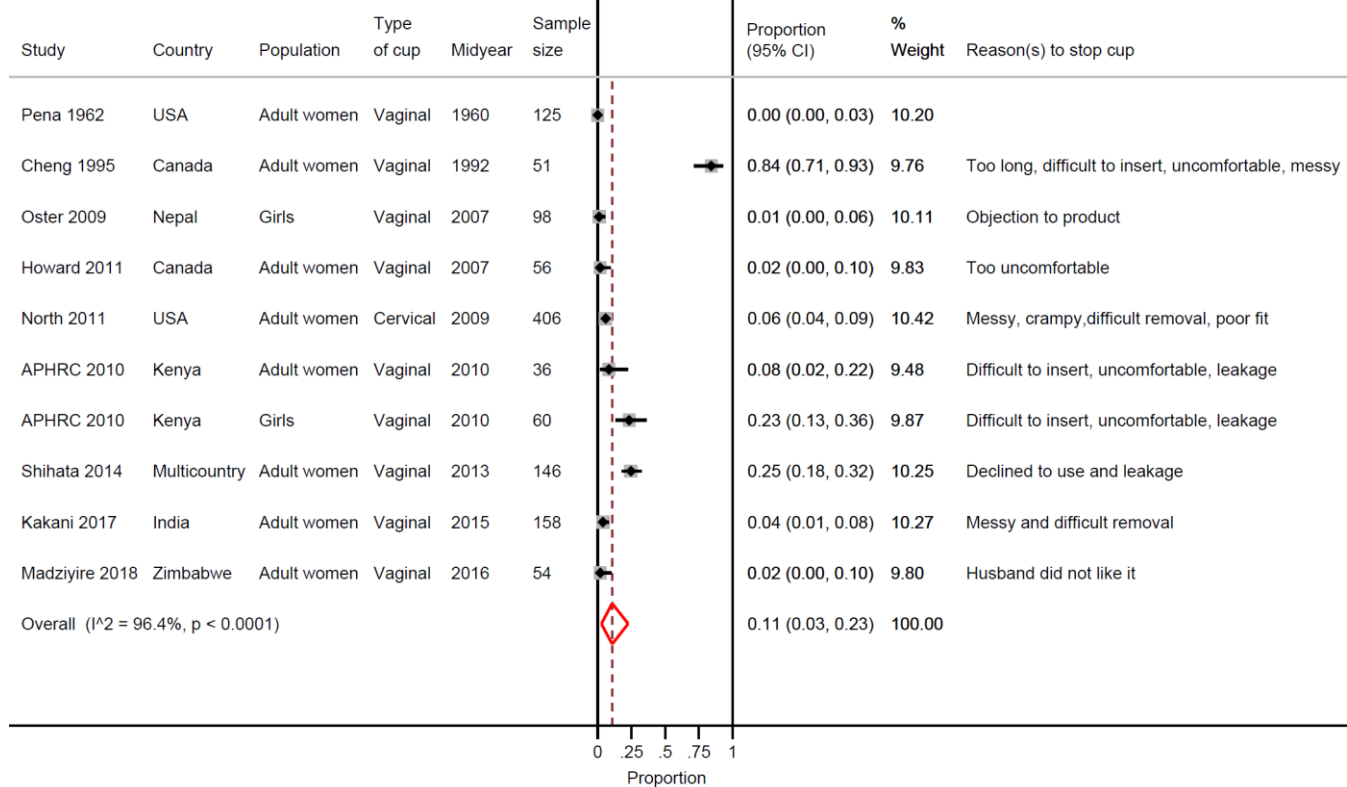

**Figure S5. Other reasons for discontinuing the menstrual cup, studies between 1960 and 2017**

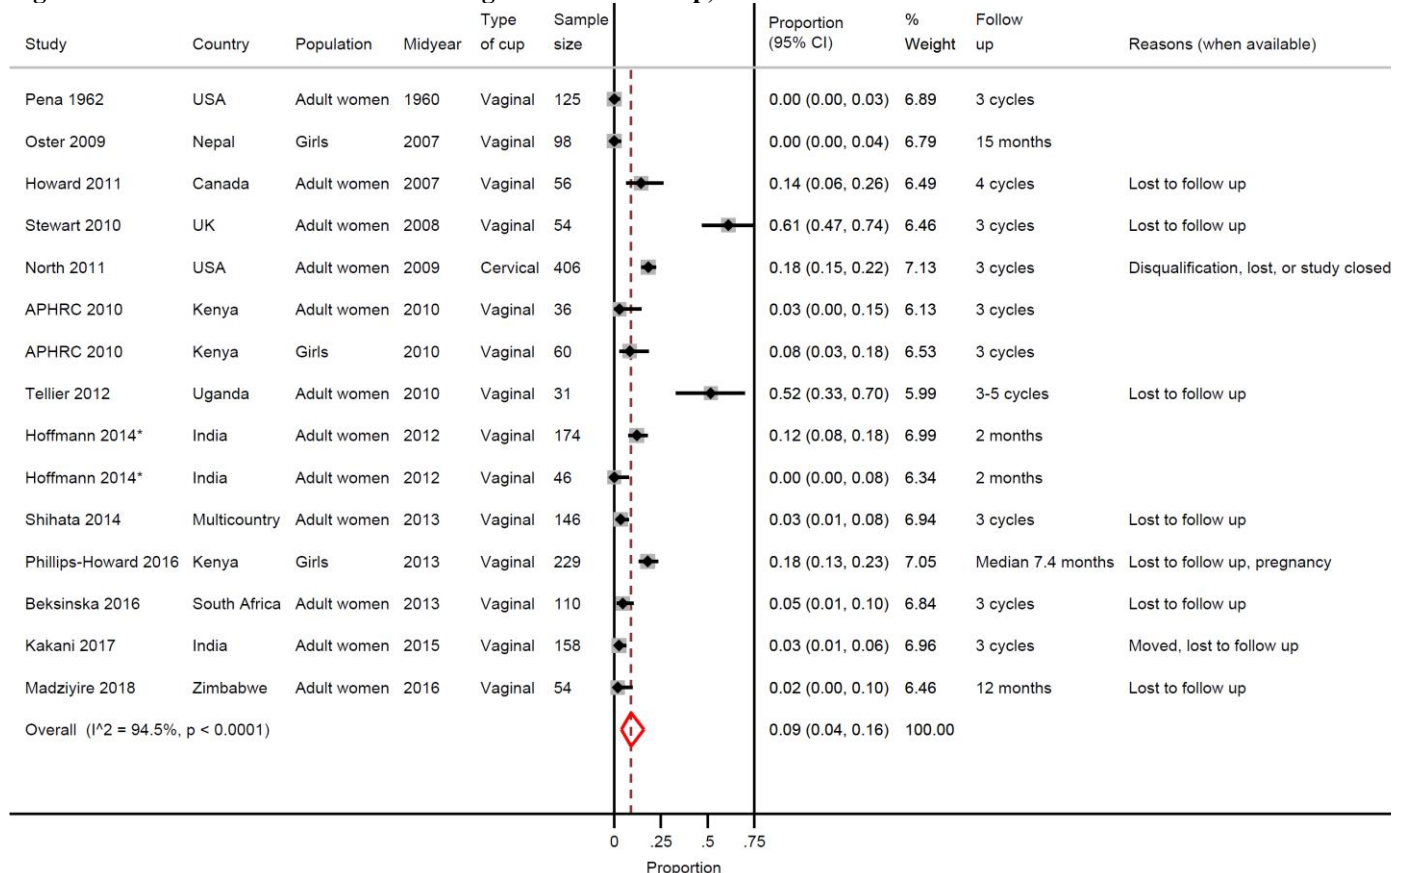

\*Hofmann 2014: 174 women received the cup by randomization, and 46 by choice.<sup>19</sup> North 2011: 23 women who were enrolled but did not qualify (e.g. abnormal laboratory results) were excluded from the analysis. Fifty-one women were not included for other reasons (forms lost, study closure, lost to follow up etc).<sup>14</sup>

**Figure S6. Reported difficulty with insertion of the menstrual cup by time point of evaluation, 1960-2017**

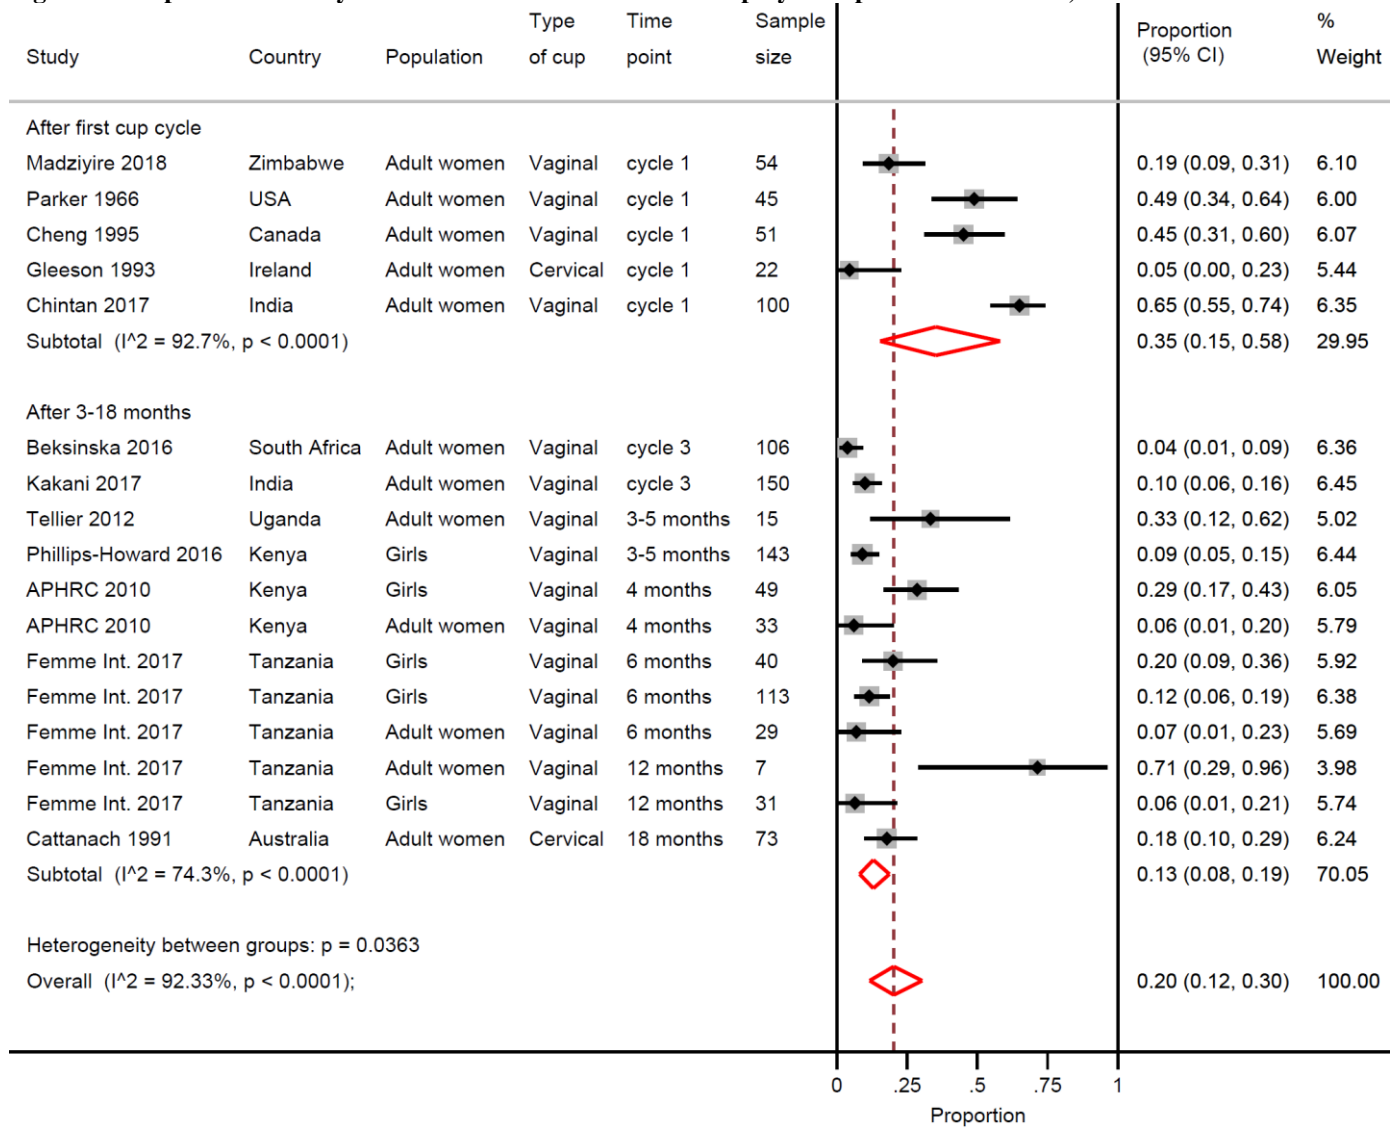

The p-value for “time point of evaluation” (graph above) was 0.15.

**Figure S7. Discomfort when wearing the menstrual cup, studies between 1960 and 2017 by time point of evaluation**

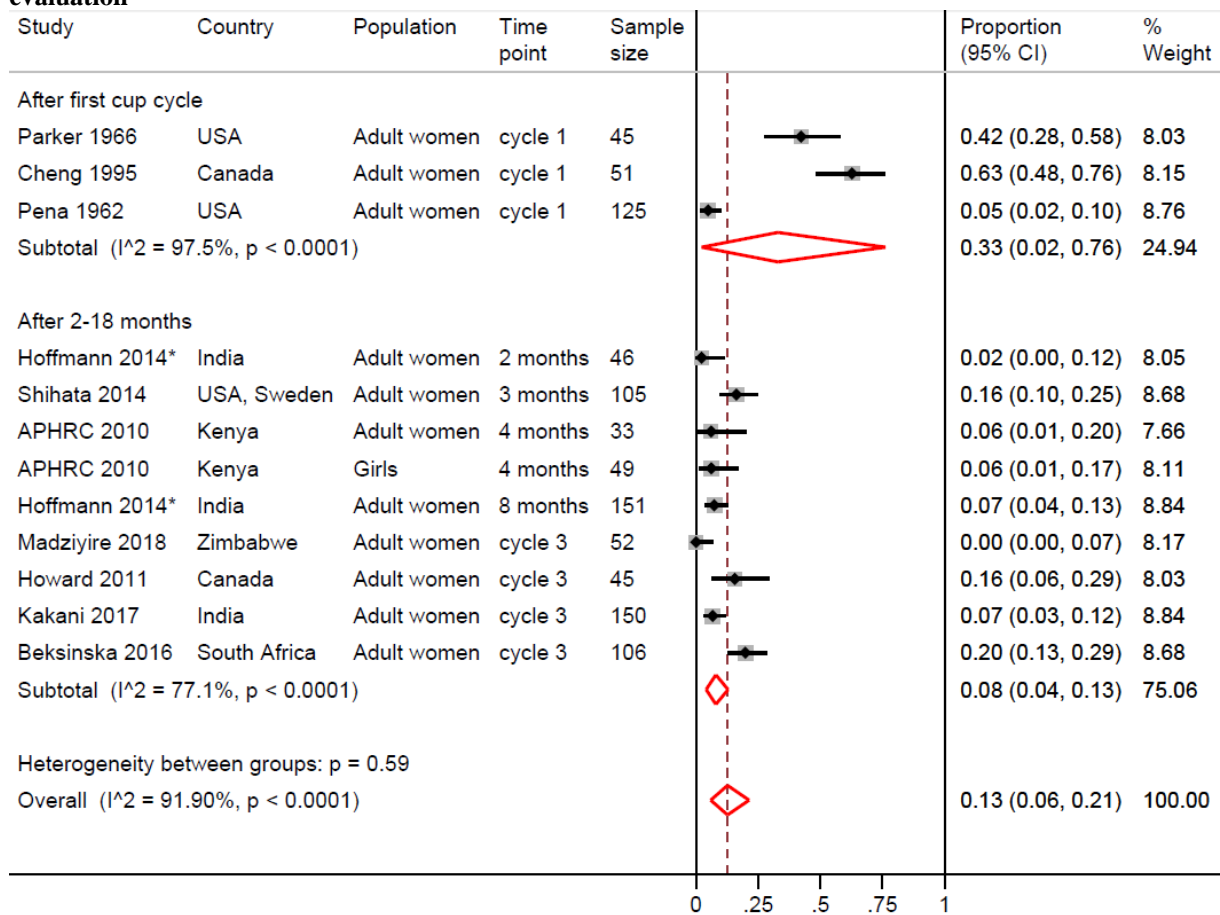

Note: All vaginal cups

\*151 women received the cup by randomization, and 46 by choice

**Figure S8. Difficulty removing the menstrual cup, studies between 1960 and 2017**

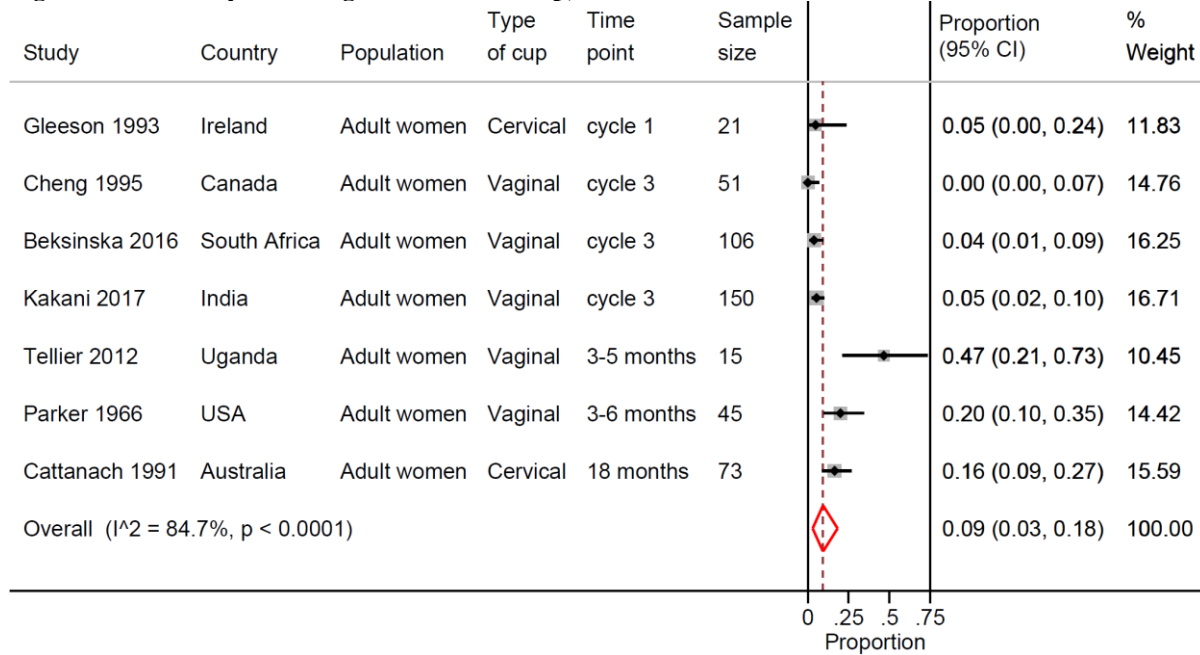

**Figure S9. Time trends for menstrual cup use in four studies with information from developing countries**

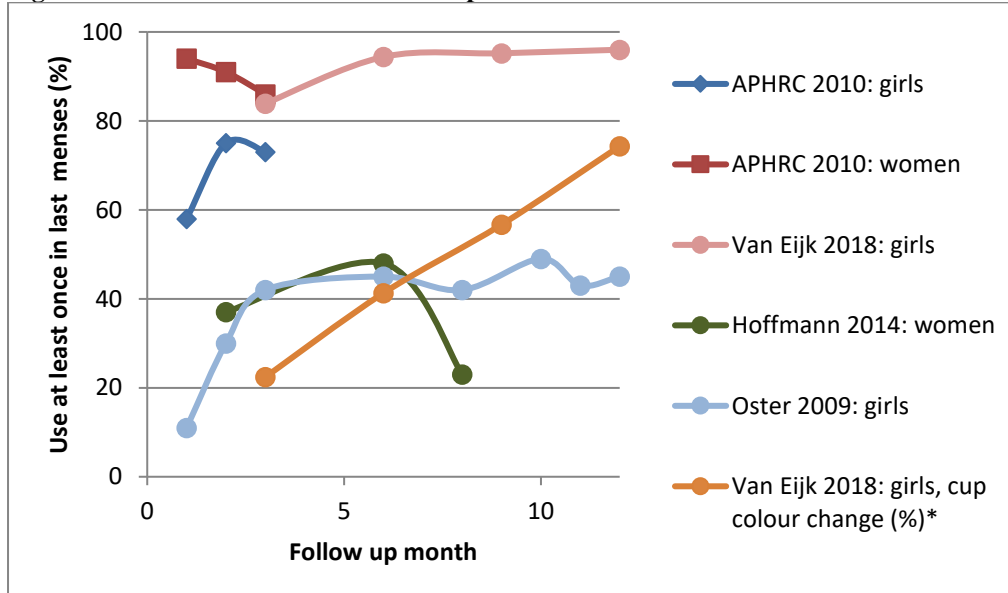

Note: In the study by Hoffman et al. (2014)<sup>19</sup>, there was an option to obtain pads among women randomized to menstrual cups from 2 months onward. In both studies by van Eijk et al. (2018)<sup>52</sup> and Oster et al. (2009)<sup>20</sup>, there was regular contact between study staff and participants. In the study by van Eijk et al. (2018)<sup>52</sup> peer support was also provided. Although peer education was absent in the study by Oster et al. (2009),<sup>21</sup> they do show that friends who use the cup are important for successful uptake.

\*For comparison, the cup colour change over time is included, as reported by van Eijk et al. (2018).<sup>52</sup> In this study, mooncups were used, which show a discolouration after use. This may be considered as a more objective measure of use compared to verbal report and may better illustrate the learning curve for cups. Note that this is aggregated data per quartile. For information by month, see the article.

**Figure S10. Sensitivity analyses, funnel plots and small-study effect**

**Sensitivity analyses results**

| Outcome                              | Number of high-quality studies or subgroups | Number of low-to-moderate quality studies or subgroups | p-value for subgroup difference |
|--------------------------------------|---------------------------------------------|--------------------------------------------------------|---------------------------------|
| Could not insert cup                 | 0                                           | 11                                                     |                                 |
| Use MC at least once (verbal report) | 0                                           | 25                                                     |                                 |
| MC-related discontinuation           | 0                                           | 10                                                     |                                 |
| Other discontinuations               | 2                                           | 13                                                     | 1.00                            |
| Difficult to insert                  | 2                                           | 15                                                     | 0.11                            |
| Uncomfortable to wear                | 1                                           | 11                                                     | 0.55                            |
| Difficult to remove                  | 1                                           | 6                                                      | 0.30                            |
| Wants to continue using the cup      | 1                                           | 14                                                     | 0.53                            |

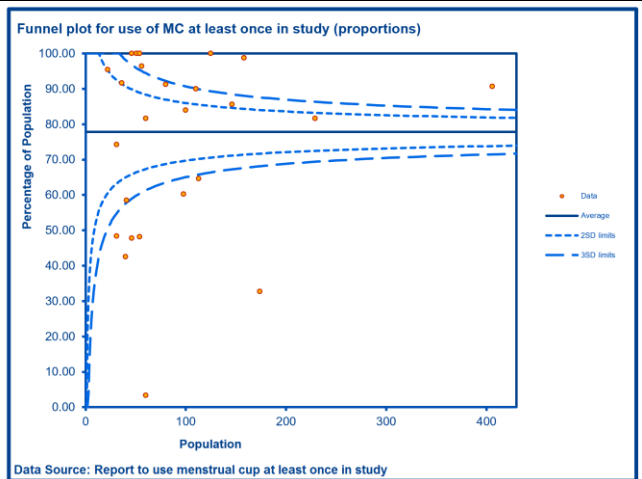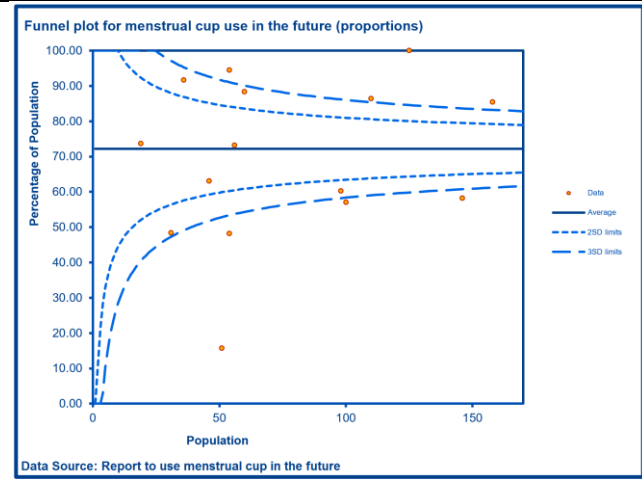

SD=standard deviation. MC=menstrual cup.

Notes: The control limits or ‘funnels’ represent the bounds of statistical confidence around the average value.<sup>6</sup> Specifically, this means that any observation plotted within the funnel limits will have a confidence interval which includes the average value. Conversely, the confidence interval of any observation plotted outside the funnel limits would not include the average value, and may therefore indicate unexpected deviation from the norm.<sup>6</sup> It is clear in these plots that most of our data points fall outside of the 2SD limits. Asymmetry in funnel plots suggests a potential for small-study effect with smaller studies (larger standard errors) showing greater treatment effects; most of our studies have small (<100) sample sizes; given the lack of studies with larger sample sizes and the wide variety in study populations and outcome measures used, it may not be possible to assess this effect properly. The two-sided p-values for asymmetry of the funnel plots by Egger’s test were 0.353 for use of MC at least once and 0.366 for future use, providing no evidence for the presence of small-study effects.

For the other outcomes examined the Egger’s test is presented below:

| Outcome                    | Number of studies | p-value Egger’s test |
|----------------------------|-------------------|----------------------|
| Could not insert cup       | 8                 | 0.041                |
| MC-related discontinuation | 9                 | 0.86                 |
| Other discontinuations     | 12                | 0.54                 |
| Difficult to insert        | 18                | 0.46                 |
| Uncomfortable to wear      | 11                | 0.48                 |
| Difficult to remove        | 6                 | 0.22                 |



**Table S13. Other outcomes examined in association with menstrual cup use**

| Study                                    | Study type                                          | Comparison                                       | Outcome                                                                             | Menstrual Cup                                | Alternative                                                                                                      | P-value |
|------------------------------------------|-----------------------------------------------------|--------------------------------------------------|-------------------------------------------------------------------------------------|----------------------------------------------|------------------------------------------------------------------------------------------------------------------|---------|
| Phillips-Howard 2016 <sup>1</sup><br>*   | Cluster randomized trial<br>Kenya                   | Vaginal cup vs. pad vs. usual<br>item            | Drop out of school – all users***                                                   | 11.2%                                        | pads 10.2%; usual item 8.0%                                                                                      | >0.05   |
| Phillips-Howard 2016 <sup>1</sup><br>*   | Cluster randomized trial<br>Kenya                   | Vaginal cup vs. pad vs. usual<br>item            | Sexually transmitted infections<br>- chlamydia<br>- gonorrhoea<br>- trichomoniasis  | 4.2%<br>2.1%<br>0.7%<br>1.4%                 | Pads: 4.5%; Control: 7.7%<br>Pads: 1.5%; Control: 4.5%<br>Pads: 0.5%; Control: 0.6%<br>Pads: 2.5%; Control: 4.5% | 0.039†  |
| Phillips-Howard 2016 <sup>1</sup><br>*   | Cluster randomized trial<br>Kenya                   | Vaginal cup vs. pad vs. usual<br>item            | Reproductive tract infections<br>- bacterial vaginosis<br>- <i>Candida albicans</i> | 21.5%<br>14.6%<br>7.7%                       | Pads: 28.7%; Control: 26.9%<br>Pads: 19.8%; Control: 20.5%<br>Pads: 9.5%; Control: 8.3%                          | >0.05   |
| APHRC 2010 <sup>25</sup>                 | Before-after study<br>Kenya                         | Vaginal cup vs. usual item                       | 1) School attendance<br>2) School concentration                                     | 1) 20% (11/55)<br>2) 29% (16/55)             | 1) 27% (16/60)<br>2) 47% (28/60)                                                                                 | NR      |
| Oster 2009 <sup>20,22</sup>              | Individually randomized trial<br>Nepal              | Vaginal cup vs. usual item                       | School attendance                                                                   |                                              |                                                                                                                  | >0.05   |
| Oster 2009 <sup>20,22</sup>              | Individually randomized trial<br>Nepal              | Vaginal cup vs. usual item                       | Daily time doing laundry during<br>menstrual period                                 |                                              |                                                                                                                  | <0.05   |
| Hoffman 2014 <sup>19</sup> ‡             | Cluster randomized trial<br>India                   | Vaginal cup vs. pads                             | Uptake of low and high barrier<br>menstrual item*                                   | 37% 2 months<br>50% 6 months<br>30% 8 months | 87% 2 months<br><br>97% 8 months                                                                                 | <0.05   |
| Stewart 2010 <sup>40</sup>               | Before-after study, UK                              | Vaginal cup vs. usual product<br>(tampon or pad) | Average number of times changed<br>per cycle                                        | 14.8                                         | 17.6                                                                                                             | NR      |
| Femme International<br>2017 <sup>2</sup> | Observational, menstrual item by<br>choice Tanzania | Vaginal cup vs. reusable pad                     | Uptake of use of product                                                            | 65.0%<br>6 months                            | 95.7%<br>6 months                                                                                                | <0.05   |

NR: Not reported.

\* When data were stratified by duration of use, participants provided with cups for 9 months or 12 months and longer had significantly lower prevalence of school dropout, STI, and BV

† p value for cups v control for sexually transmitted infections combined, adjusted for covariates

‡ Hoffman 2014<sup>19</sup>: Assumed 11.9% loss to follow up at 2 months as reported by authors. In this trial with an elaborate design there was ability to cross-over in some clusters at 2 and 6 months: “Usage of menstrual cups fell off sharply when these women were later given pads, suggesting that many women prefer pads, but will use the cup if pads are not available or affordable”.

## Section 2.3 Visibility, availability, costs and waste

### Visibility of MCs

Three studies in HIC with information on potential use of a MC suggested MCs were not well known, with only 11-33% of the persons interviewed aware,<sup>44-46</sup> although interest in a fourth study in Zimbabwe was considerable (Table S14).<sup>43</sup> We identified 69 websites from 27 countries and one international organization with educational or teaching materials to guide adolescent girls through menarche (Table S15); disposable pads, tampons, MCs, and reusable pads were reported by 76.8%, 65.2%, 30.4 and 21.7%, respectively, with some regional differences (Figure S16).

**Table S14. Evaluation of potential use of menstrual cup**

| Study                       | Location          | Time      | Design                                                                       | Sample size and population                                                                        | Menstrual cup                  | Outcome examined                                                                                    | Results                                                                                                                                                                                                                                                                                                         | Comments                                                                                                                                                                                                                                                                                |
|-----------------------------|-------------------|-----------|------------------------------------------------------------------------------|---------------------------------------------------------------------------------------------------|--------------------------------|-----------------------------------------------------------------------------------------------------|-----------------------------------------------------------------------------------------------------------------------------------------------------------------------------------------------------------------------------------------------------------------------------------------------------------------|-----------------------------------------------------------------------------------------------------------------------------------------------------------------------------------------------------------------------------------------------------------------------------------------|
| Averbach 2009 <sup>43</sup> | Epworth, Zimbabwe | 2007-2008 | Survey & FGD                                                                 | 43 adult women, 18-45 years, convenience sample from public clinics, markets and shopping centers | Duet (cervical cup, re-usable) | Consider use (Duet demonstrated but not tried by participants)                                      | 100% would try Duet for menstrual protection<br>76.7% would not be concerned if used for both menstruation and contraception<br>86.1% thinks it would make a difference to their lives<br>100% think the low cost and easiness to clean are important for trying<br>30% concerns about Duet getting lost inside | “Women felt that Duet potentially addressed the washing, drying and other hygiene issues they had with home products, as it is easy to wash with a small amount of water and soap, it can be immediately dried and reinserted, and thus is discreet.”                                   |
| Stewart 2009 <sup>46</sup>  | Nottingham, UK    | NR        | Survey                                                                       | 69 patients attending a menstrual disorder clinic                                                 | Mooncup                        | Acceptability after reading information leaflet                                                     | 20% had heard of cup. 38% would consider cup in future. One woman already used it. 69% mentioned perceived messiness as reason against considering mooncup, and 51% the need for washing between uses.                                                                                                          | Higher potential use by age:<br><30 years 3/18 (16.7%)<br>30-40 years 8/21 (38.1%)<br>>40 years 15/30 (50.0%)<br>p = 0.04 (Fisher), <30 vs. >40<br>“Women who used tampons and described their menstrual flow as average to heavy were more likely to consider...” (Data not presented) |
| Grose 2014 <sup>45</sup>    | California, USA   | NR        | Survey: evaluation of water bottle (dummy) and menstrual cup by participants | 151 female undergraduates                                                                         | No particular brand            | The relationship between self-objectification and attitudes toward an alternative menstrual product | 33% knew menstrual cup. On scale 1-5 (1 = yes, 5 is no), mean 2.5 if asked if they would use the menstrual cup if it was given to them. 6% would use and 15 (9.9%) probably would use.                                                                                                                          | “...higher levels of self-objectification were related to more negative attitudes toward one’s menstruation, which was, in turn, negatively related to women’s own probable purchase or use of the product, as well as overall negative reactions to it.”                               |
| Borowski 2011 <sup>44</sup> | USA               | 2011      | Survey and key person interviews                                             | 155 adult women, selected group related to author (80% white)                                     | No particular brand            | Awareness of environmental and health issues of menstrual products                                  | 69% not aware of eco-friendly feminine hygiene products<br>Among 47/150 (31.3%) who were aware of eco-friendly products, 18 mentioned menstrual cups (38.3% or 11.6% overall).<br>Advertisement and main stream marketing was considered important by participants for scaling up eco-friendly products         | “The thing that keeps me from considering reusable products is the need to have to either emerge from a public toilet stall with blood on one’s hands/a used cup or carry a soiled pad around in one’s purse after use. I’m not sure how to solve these problems.”                      |

Abbreviations: FGD=Focus groups discussions.

**Table S15. Menstrual items reported in education material for girls**

| Country     | Website                                                                                                                                                                                                                                                                                                                         | Date accessed | Language            | Disposable pads | Tampons | Menstrual Cup | Reusable pads |
|-------------|---------------------------------------------------------------------------------------------------------------------------------------------------------------------------------------------------------------------------------------------------------------------------------------------------------------------------------|---------------|---------------------|-----------------|---------|---------------|---------------|
| Argentina   | <a href="http://www1.paho.org/hq/dmdocuments/2010/Recomendaciones-atencion-integral-salud-adolescentes-salud-sexual-reproductiva.pdf">http://www1.paho.org/hq/dmdocuments/2010/Recomendaciones-atencion-integral-salud-adolescentes-salud-sexual-reproductiva.pdf</a>                                                           | 21 May 2018   | Spanish             | Yes             | Yes     | No            | No            |
| Australia   | <a href="https://www.betterhealth.vic.gov.au/health/conditionsandtreatments/menstrual-cycle">https://www.betterhealth.vic.gov.au/health/conditionsandtreatments/menstrual-cycle</a>                                                                                                                                             | 25 May 2019   | English             | Yes             | Yes     | No            | No            |
| Australia   | <a href="http://www.cyh.com/HealthTopics/HealthTopicDetailsKids.aspx?p=335&amp;np=289&amp;id=1817#12">http://www.cyh.com/HealthTopics/HealthTopicDetailsKids.aspx?p=335&amp;np=289&amp;id=1817#12</a>                                                                                                                           | 25 May 2019   | English             | Yes             | Yes     | No            | No            |
| Australia   | <a href="https://www.healthdirect.gov.au/menstruation">https://www.healthdirect.gov.au/menstruation</a>                                                                                                                                                                                                                         | 25 May 2019   | English             | No              | No      | No            | No            |
| Australia   | <a href="https://jeanhailes.org.au/health-a-z/periods/about-the-menstrual-cycle">https://jeanhailes.org.au/health-a-z/periods/about-the-menstrual-cycle</a>                                                                                                                                                                     | 25 May 2019   | English             | Yes             | Yes     | Yes           | Yes           |
| Australia   | <a href="http://raisingchildren.net.au/articles/periods.html#sanitary">http://raisingchildren.net.au/articles/periods.html#sanitary</a>                                                                                                                                                                                         | 25 May 2019   | English             | Yes             | Yes     | No            | No            |
| Brazil      | <a href="http://www.adolescencia.org.br/site-pt-br/corpo-da-menina">http://www.adolescencia.org.br/site-pt-br/corpo-da-menina</a>                                                                                                                                                                                               | 23 May 2018   | Portuguese          | No              | No      | No            | No            |
| Brazil      | <a href="https://brasilecola.uol.com.br/saude/coleitor-menstrual.htm">https://brasilecola.uol.com.br/saude/coleitor-menstrual.htm</a>                                                                                                                                                                                           | 26 May 2018   | Portuguese          | No              | No      | Yes           | No            |
| Brazil      | <a href="http://bvsmms.saude.gov.br/bvs/folder/10006002035.pdf">http://bvsmms.saude.gov.br/bvs/folder/10006002035.pdf</a>                                                                                                                                                                                                       | 21 May 2018   | Portuguese          | Yes             | No      | No            | No            |
| Brazil      | <a href="http://bvsmms.saude.gov.br/bvs/publicacoes/caderneta_saude_adolescente_menina.pdf">http://bvsmms.saude.gov.br/bvs/publicacoes/caderneta_saude_adolescente_menina.pdf</a>                                                                                                                                               | 23 May 2018   | Portuguese          | No              | No      | No            | No            |
| Brazil      | <a href="https://www.mdsaude.com/ginecologia/menstruacao/primeira-menstruacao-menarca_(medical_blog)">https://www.mdsaude.com/ginecologia/menstruacao/primeira-menstruacao-menarca_(medical_blog)</a>                                                                                                                           | 26 May 2018   | Portuguese          | Yes             | Yes     | No            | No            |
| Canada      | <a href="http://www.canadianliving.com/health/nutrition/article/stages-of-puberty">http://www.canadianliving.com/health/nutrition/article/stages-of-puberty</a>                                                                                                                                                                 | 25 May 2019   | English             | Yes             | Yes     | No            | No            |
| Canada      | <a href="https://www.caringforkids.cps.ca/handouts/information_for_girls_about_puberty">https://www.caringforkids.cps.ca/handouts/information_for_girls_about_puberty</a>                                                                                                                                                       | 25 May 2019   | English/<br>French  | No              | No      | No            | No            |
| Canada      | <a href="http://www.cwhn.ca/en/node/44808">http://www.cwhn.ca/en/node/44808</a>                                                                                                                                                                                                                                                 | 25 May 2019   | English/<br>French  | Yes             | Yes     | Yes           | Yes           |
| Canada      | <a href="https://www.mamanpourlavie.com/sante/enfant/developpement/sexualite/4025-les-premieres-menstruations.shtml">https://www.mamanpourlavie.com/sante/enfant/developpement/sexualite/4025-les-premieres-menstruations.shtml</a>                                                                                             | 25 May 2019   | French              | Yes             | Yes     | No            | No            |
| Canada      | <a href="https://teachingsexualhealth.ca/teachers/wp-content/uploads/sites/4/2016/12/5-DA-My-Period-FRENCH-2014.pdf">https://teachingsexualhealth.ca/teachers/wp-content/uploads/sites/4/2016/12/5-DA-My-Period-FRENCH-2014.pdf</a>                                                                                             | 25 May 2019   | English/<br>French  | Yes             | Yes     | Yes           | No            |
| Canada      | <a href="https://www.yourperiod.ca/fr/normal-periods/your-first-period/">https://www.yourperiod.ca/fr/normal-periods/your-first-period/</a>                                                                                                                                                                                     | 25 May 2019   | English/<br>French  | Yes             | Yes     | Yes           | Yes           |
| Chile       | <a href="https://www.clinicalascondes.cl/BLOG/Listado/Pediatria/La-primera-menstruacion">https://www.clinicalascondes.cl/BLOG/Listado/Pediatria/La-primera-menstruacion</a>                                                                                                                                                     | 20 May 2018   | Spanish             | Yes             | No      | No            | No            |
| Chile       | <a href="http://www.codajic.org/sites/www.codajic.org/files/100-Preguntas-Sobre-Sexualidad-Adolescente.pdf">http://www.codajic.org/sites/www.codajic.org/files/100-Preguntas-Sobre-Sexualidad-Adolescente.pdf</a>                                                                                                               | 20 May 2018   | Spanish             | No              | Yes     | Yes           | No            |
| Chile       | <a href="https://www.saludactual.cl/ginecologia/como-hablar-con-tu-hija-del-ciclo-menstrual.php">https://www.saludactual.cl/ginecologia/como-hablar-con-tu-hija-del-ciclo-menstrual.php</a>                                                                                                                                     | 20 May 2018   | Spanish             | No              | No      | No            | No            |
| Colombia    | <a href="https://www.minsalud.gov.co/Documentos%20y%20Publicaciones/Modelo%20de%20servicios%20de%20salud%20amigables%20para%20adolescentes%20y%20j%C3%B3venes.pdf">https://www.minsalud.gov.co/Documentos%20y%20Publicaciones/Modelo%20de%20servicios%20de%20salud%20amigables%20para%20adolescentes%20y%20j%C3%B3venes.pdf</a> | 21 May 2018   | Spanish             | No              | No      | No            | No            |
| France      | <a href="http://www.doctissimo.fr/html/sexualite/hygiene-feminine/articles/se_6684_regles_faq.htm">http://www.doctissimo.fr/html/sexualite/hygiene-feminine/articles/se_6684_regles_faq.htm</a>                                                                                                                                 | 25 May 2019   | French              | Yes             | Yes     | Yes           | No            |
| France      | <a href="http://www.doctissimo.fr/html/sexualite/hygiene-feminine/articles/se_7067_premieres_regles_panique.htm">http://www.doctissimo.fr/html/sexualite/hygiene-feminine/articles/se_7067_premieres_regles_panique.htm</a>                                                                                                     | 25 May 2019   | French              | Yes             | Yes     | Yes           | No            |
| France      | <a href="http://unesdoc.unesco.org/images/0022/002267/226792e.pdf">http://unesdoc.unesco.org/images/0022/002267/226792e.pdf</a>                                                                                                                                                                                                 | 25 May 2019   | French /<br>English | Yes             | Yes     | Yes           | Yes           |
| France      | <a href="https://www.youtube.com/watch?v=IFdneet53mg">https://www.youtube.com/watch?v=IFdneet53mg</a>                                                                                                                                                                                                                           | 25 May 2019   | French              | Yes             | Yes     | Yes           | No            |
| Germany     | <a href="http://www.maedchen.de/love/periode-menstruation-infos#TamponOderBinde">http://www.maedchen.de/love/periode-menstruation-infos#TamponOderBinde</a>                                                                                                                                                                     | 25 May 2019   | German              | Yes             | Yes     | Yes           | No            |
| Germany     | <a href="http://www.netdoktor.de/Gesund-Leben/Womens-Health/Menstruation/Die-erste-Regel-Menstruation-527.html">http://www.netdoktor.de/Gesund-Leben/Womens-Health/Menstruation/Die-erste-Regel-Menstruation-527.html</a>                                                                                                       | 25 May 2019   | German              | Yes             | Yes     | No            | No            |
| Germany     | <a href="https://www.profamilia.de/fileadmin/publikationen/Jugendliche/Broschuere_Menstruation_140203_ANSICHT.pdf">https://www.profamilia.de/fileadmin/publikationen/Jugendliche/Broschuere_Menstruation_140203_ANSICHT.pdf</a>                                                                                                 | 25 May 2019   | German              | Yes             | Yes     | No            | No            |
| Germany     | <a href="http://www.t-online.de/eltern/schulkind/id_18126782/menstruation-maedchen-auf-die-erste-blutung-vorbereiten.html">http://www.t-online.de/eltern/schulkind/id_18126782/menstruation-maedchen-auf-die-erste-blutung-vorbereiten.html</a>                                                                                 | 25 May 2019   | German              | Yes             | Yes     | No            | No            |
| Hong Kong   | <a href="https://www.studenthealth.gov.hk/english/health/health_se/health_se_ps.html">https://www.studenthealth.gov.hk/english/health/health_se/health_se_ps.html</a> (for students)                                                                                                                                            | 25 May 2019   | English             | Yes             | No      | No            | No            |
| Hong Kong   | <a href="https://www.studenthealth.gov.hk/english/health/health_se/health_se_pp.html">https://www.studenthealth.gov.hk/english/health/health_se/health_se_pp.html</a> (for parents)                                                                                                                                             | 25 May 2019   | English             | No              | No      | No            | No            |
| India       | <a href="https://mdws.gov.in/menstrual-hygiene-management-national-guidelines-december-2015">https://mdws.gov.in/menstrual-hygiene-management-national-guidelines-december-2015</a>                                                                                                                                             | 25 May 2019   | English             | Yes             | Yes     | Yes           | Yes           |
| Malawi      | <a href="https://www.unicef.org/wash/schools/files/UNICEF-MenstrualHygiene-PRINT-27May15.pdf">https://www.unicef.org/wash/schools/files/UNICEF-MenstrualHygiene-PRINT-27May15.pdf</a>                                                                                                                                           | 25 May 2019   | English             | Yes             | No      | Yes           | Yes           |
| Mexico      | <a href="http://infogen.org.mx/menstruacion/">http://infogen.org.mx/menstruacion/</a>                                                                                                                                                                                                                                           | 20 May 2018   | Spanish             | Yes             | Yes     | No            | No            |
| Mexico      | <a href="http://www.saludnl.gob.mx/drupal/las-ni%C3%B1as-y-la-pubertad">http://www.saludnl.gob.mx/drupal/las-ni%C3%B1as-y-la-pubertad</a>                                                                                                                                                                                       | 20 May 2018   | Spanish             | No              | No      | No            | No            |
| Mozambique  | <a href="https://www.medicusmundi.cat/wp-content/uploads/2016/09/Manual-Saude-Escolar_OK.pdf">https://www.medicusmundi.cat/wp-content/uploads/2016/09/Manual-Saude-Escolar_OK.pdf</a>                                                                                                                                           | 26 May 2018   | Portuguese          | Yes             | Yes     | No            | Yes           |
| Netherlands | <a href="https://www.opvoeden.nl/uber/verzorging-en-veiligheid/lichaamsverzorging/maandverband-en-tampons/">https://www.opvoeden.nl/uber/verzorging-en-veiligheid/lichaamsverzorging/maandverband-en-tampons/</a>                                                                                                               | 25 May 2019   | Dutch               | Yes             | Yes     | No            | No            |
| Netherlands | <a href="https://rutgers.media/pubergids/ongesteld-woorden/">https://rutgers.media/pubergids/ongesteld-woorden/</a>                                                                                                                                                                                                             | 25 May 2019   | Dutch               | Yes             | Yes     | No            | No            |
| Netherlands | <a href="https://www.seksualiteit.be/voorlichting/puberteit-en-lichaam/de-eerste-menstruatie">https://www.seksualiteit.be/voorlichting/puberteit-en-lichaam/de-eerste-menstruatie</a>                                                                                                                                           | 25 May 2019   | Dutch               | Yes             | Yes     | No            | No            |
| Netherlands | <a href="https://www.sense.info/ontdek-je-lichaam/meisjeslichaam/menstruatie/maandverband-en-tampons">https://www.sense.info/ontdek-je-lichaam/meisjeslichaam/menstruatie/maandverband-en-tampons</a>                                                                                                                           | 25 May 2019   | Dutch               | Yes             | Yes     | No            | No            |
| New Zealand | <a href="https://www.healthnavigator.org.nz/health-a-z/m/menstruation/">https://www.healthnavigator.org.nz/health-a-z/m/menstruation/</a>                                                                                                                                                                                       | 25 May 2019   | English             | Yes             | Yes     | No            | No            |
| New Zealand | <a href="https://www.kiwifamilies.co.nz/articles/periods-information-sheet/">https://www.kiwifamilies.co.nz/articles/periods-information-sheet/</a>                                                                                                                                                                             | 25 May 2019   | English             | Yes             | Yes     | No            | No            |

|                   |                                                                                                                                                                                                                                                                                                                                                                                           |             |            |     |     |     |     |
|-------------------|-------------------------------------------------------------------------------------------------------------------------------------------------------------------------------------------------------------------------------------------------------------------------------------------------------------------------------------------------------------------------------------------|-------------|------------|-----|-----|-----|-----|
| Paraguay          | <a href="http://www.paho.org/par/index.php?option=com_docman&amp;view=download&amp;category_slug=publicaciones-con-contrapartes&amp;alias=384-manual-clinico-de-la-adolescencia&amp;Itemid=253">http://www.paho.org/par/index.php?option=com_docman&amp;view=download&amp;category_slug=publicaciones-con-contrapartes&amp;alias=384-manual-clinico-de-la-adolescencia&amp;Itemid=253</a> | 21 May 2018 | Spanish    | Yes | No  | No  | No  |
| Peru              | <a href="http://www.familycareintl.org/UserFiles/File/Informato%20Flip%20Chart%20optimized.pdf">http://www.familycareintl.org/UserFiles/File/Informato%20Flip%20Chart%20optimized.pdf</a>                                                                                                                                                                                                 | 26 May 2018 | Spanish    | Yes | No  | No  | No  |
| Portugal          | <a href="https://www.dge.mec.pt/sites/default/files/Esauade/guia_adoles_ser.pdf">https://www.dge.mec.pt/sites/default/files/Esauade/guia_adoles_ser.pdf</a>                                                                                                                                                                                                                               | 23 May 2018 | Portuguese | No  | No  | No  | No  |
| Portugal          | <a href="https://juventude.gov.pt/saudesexualidadejuvenil/sexualidade/nossocorpo/paginas/menstrua%C3%A7%C3%A3oociclomenstrual.aspx">https://juventude.gov.pt/saudesexualidadejuvenil/sexualidade/nossocorpo/paginas/menstrua%C3%A7%C3%A3oociclomenstrual.aspx</a>                                                                                                                         | 23 May 2018 | Portuguese | No  | No  | No  | No  |
| Save the children | <a href="https://www.savethechildren.org/content/dam/global/reports/health-and-nutrition/mens-hyg-mgmt-guide.pdf">https://www.savethechildren.org/content/dam/global/reports/health-and-nutrition/mens-hyg-mgmt-guide.pdf</a>                                                                                                                                                             | 25 May 2019 | English    | Yes | Yes | Yes | Yes |
| Singapore         | <a href="https://sg.theasianparent.com/your-daughters-first-period/">https://sg.theasianparent.com/your-daughters-first-period/</a>                                                                                                                                                                                                                                                       | 25 May 2019 | English    | Yes | Yes | No  | No  |
| Singapore         | <a href="https://www.healthhub.sg/live-healthy/957/help-your-child-cope-with-puberty-and-self-esteem">https://www.healthhub.sg/live-healthy/957/help-your-child-cope-with-puberty-and-self-esteem</a>                                                                                                                                                                                     | 25 May 2019 | English    | Yes | No  | No  | No  |
| South Africa      | <a href="https://www.health24.com/Lifestyle/Woman/Menstruation/Your-first-period-20120721">https://www.health24.com/Lifestyle/Woman/Menstruation/Your-first-period-20120721</a>                                                                                                                                                                                                           | 25 May 2019 | English    | Yes | Yes | No  | No  |
| Spain             | <a href="https://www.sanitas.es/sanitas/seguros/es/particulares/biblioteca-de-salud/ginecologia/aparato-genital-femenino/sin012102wr.html">https://www.sanitas.es/sanitas/seguros/es/particulares/biblioteca-de-salud/ginecologia/aparato-genital-femenino/sin012102wr.html</a>                                                                                                           | 20 May 2018 | Spanish    | No  | No  | No  | No  |
| Uganda            | <a href="https://www.education.go.ug/files/downloads/Menstruation_Management_Reader_2017.pdf">https://www.education.go.ug/files/downloads/Menstruation_Management_Reader_2017.pdf</a>                                                                                                                                                                                                     | 25 May 2019 | English    | Yes | No  | No  | Yes |
| UK                | <a href="http://www.nhs.uk/Conditions/Periods/Pages/Introduction.aspx#Sanitary_products">http://www.nhs.uk/Conditions/Periods/Pages/Introduction.aspx#Sanitary_products</a>                                                                                                                                                                                                               | 25 May 2019 | English    | Yes | Yes | Yes | No  |
| Uruguay           | <a href="https://www.gub.uy/ministerio-salud-publica/sites/ministerio-salud-publica/files/documentos/publicaciones/EligiendoNOS%20para%20adolescentes%20INMUJERES%202017.pdf">https://www.gub.uy/ministerio-salud-publica/sites/ministerio-salud-publica/files/documentos/publicaciones/EligiendoNOS%20para%20adolescentes%20INMUJERES%202017.pdf</a>                                     | 21 May 2018 | Spanish    | No  | No  | No  | No  |
| Uruguay           | <a href="https://www.unicef.org/uruguay/spanish/Es_parte_de_la_vida_tagged.pdf">https://www.unicef.org/uruguay/spanish/Es_parte_de_la_vida_tagged.pdf</a>                                                                                                                                                                                                                                 | 26 May 2018 | Spanish    | No  | No  | No  | No  |
| USA               | <a href="https://www.acog.org/Patients/FAQs/Your-First-Period-Especially-for-Teens">https://www.acog.org/Patients/FAQs/Your-First-Period-Especially-for-Teens</a>                                                                                                                                                                                                                         | 25 May 2019 | English    | Yes | Yes | Yes | No  |
| USA               | <a href="https://www.everydayhealth.com/pms/a-teens-guide-to-her-first-period.aspx">https://www.everydayhealth.com/pms/a-teens-guide-to-her-first-period.aspx</a>                                                                                                                                                                                                                         | 25 May 2018 | English    | Yes | Yes | No  | No  |
| USA               | <a href="https://www.girlshealth.gov/body/period/pads.html">https://www.girlshealth.gov/body/period/pads.html</a>                                                                                                                                                                                                                                                                         | 25 May 2019 | English    | Yes | Yes | Yes | Yes |
| USA               | <a href="http://kidshealth.org/en/teens/menstruation.html">http://kidshealth.org/en/teens/menstruation.html</a>                                                                                                                                                                                                                                                                           | 25 May 2019 | English    | Yes | Yes | Yes | No  |
| USA               | <a href="https://kidshealth.org/en/kids/menstruation.html">https://kidshealth.org/en/kids/menstruation.html</a>                                                                                                                                                                                                                                                                           | 25 May 2019 | Spanish    | Yes | Yes | No  | No  |
| USA               | <a href="https://www.medicinenet.com/menstruation/article.htm#how_often_should_i_change_my_padtampon">https://www.medicinenet.com/menstruation/article.htm#how_often_should_i_change_my_padtampon</a>                                                                                                                                                                                     | 25 May 2019 | English    | Yes | Yes | No  | No  |
| USA               | <a href="https://medlineplus.gov/menstruation.html">https://medlineplus.gov/menstruation.html</a>                                                                                                                                                                                                                                                                                         | 25 May 2019 | English    | Yes | Yes | No  | No  |
| USA               | <a href="https://www.plannedparenthood.org/learn/health-and-wellness/menstruation/how-do-i-use-tampons-pads-and-menstrual-cups">https://www.plannedparenthood.org/learn/health-and-wellness/menstruation/how-do-i-use-tampons-pads-and-menstrual-cups</a>                                                                                                                                 | 25 May 2019 | English    | Yes | Yes | Yes | Yes |
| USA               | <a href="https://teens.webmd.com/girls/all-about-menstruation#4">https://teens.webmd.com/girls/all-about-menstruation#4</a>                                                                                                                                                                                                                                                               | 25 May 2019 | Spanish    | Yes | Yes | Yes | Yes |
| USA               | <a href="https://www.webmd.com/parenting/features/daughters-first-period-how-to-prepare#2">https://www.webmd.com/parenting/features/daughters-first-period-how-to-prepare#2</a>                                                                                                                                                                                                           | 25 May 2019 | English    | No  | No  | No  | No  |
| USA               | <a href="https://www.womenshealth.gov/menstrual-cycle/your-menstrual-cycle">https://www.womenshealth.gov/menstrual-cycle/your-menstrual-cycle</a>                                                                                                                                                                                                                                         | 25 May 2019 | English    | Yes | Yes | Yes | Yes |
| USA               | <a href="http://youngwomenshealth.org/2013/03/28/period-products/">http://youngwomenshealth.org/2013/03/28/period-products/</a>                                                                                                                                                                                                                                                           | 25 May 2019 | English    | Yes | Yes | Yes | Yes |
| Zambia            | <a href="http://www.washplus.org/sites/default/files/mhm_toolkit2015.pdf">www.washplus.org/sites/default/files/mhm_toolkit2015.pdf</a>                                                                                                                                                                                                                                                    | 25 May 2019 | English    | Yes | Yes | No  | Yes |
| Zimbabwe          | <a href="http://www.wrc.org.za/mdocs-posts/growing-girls-mhm-booklet-english/growing-girls-mhm-booklet-english-2/">http://www.wrc.org.za/mdocs-posts/growing-girls-mhm-booklet-english/growing-girls-mhm-booklet-english-2/</a>                                                                                                                                                           | 25 May 2019 | English    | Yes | No  | No  | Yes |

Search term: [Country Name] menstruation information adolescents; Spanish: información para adolescentes menstru\* [nombre del país]; Netherlands: Menstruatie informatie meisjes; German: Menstruation Information madchen; French: Premiere Menstruation information fille; Portuguese: informação para adolescents menstru\*

† This pamphlet has information on the sponge for menstruation.

Disclaimer: This was a search to explore the mention of menstrual cup as an option to deal with menstruation, and not intended to be fully inclusive of all potential websites. We do not endorse any website.

**Figure S11. Menstrual items mentioned in education material on menarche, from 69 websites, 27 countries**

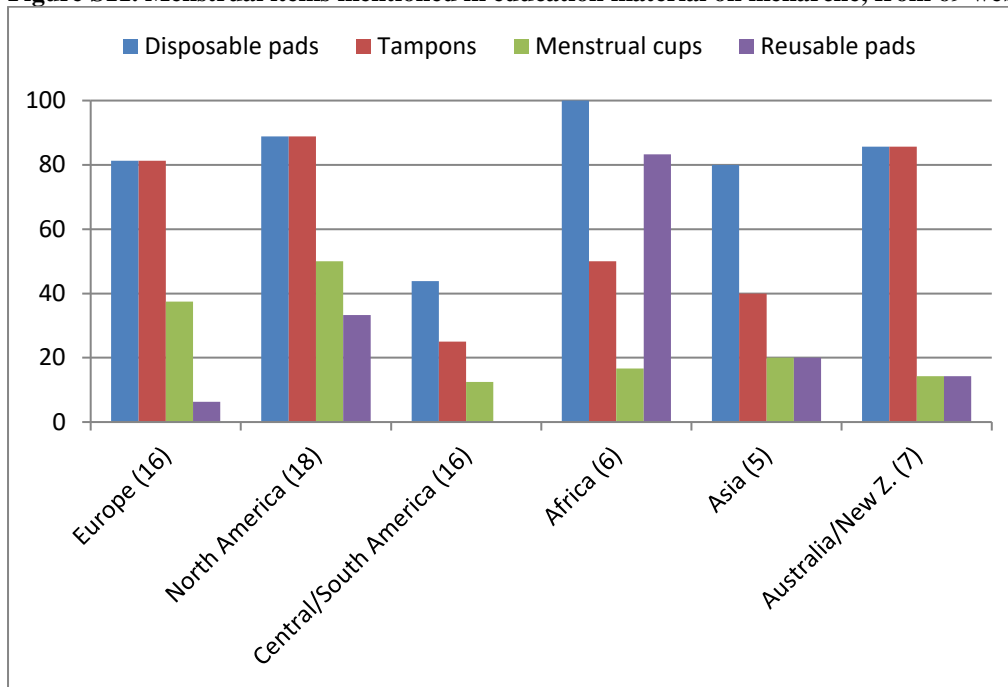

New Z.: New Zealand

For the methods see section 2; for a table of sources, see Table S15. The number of entries per region is in brackets. By region, disposable pads were mentioned in over 80% except for South America (43.8%); tampons were only in Europe, North America and Australia/New Zealand over 80%, whereas MCs were mentioned between 12.5% and 50.0%.

### Costs and availability

Using the Menstrual Cup Master List<sup>11</sup> and other sources, 199 brands were identified (in 35 countries, for 20 MCs country of origin unknown); purchasing prices and availability were retrieved for 145 brands (from 32 countries, for 4 MCs the country of origin unknown, Fig S12). These brands were available across 99 countries for purchase; availability of MCs was confirmed by web links or reports on shop sources (Fig S13). The purchasing price of one MC ranged from US\$ 0.72 (Chinese MC) to 46.72 (Danish MC); the median and average were 23.35 and 22.90 (prices by global region and country income level: Fig S14 & S15). Most MCs were made from silicone (98%), 1.4% from thermoplastic elastomer, and 0.6% from latex. Availability of MCs by web links or reports on shop sources was confirmed for 99 countries (Fig S18).

**Figure S12. Countries with brands of menstrual cups (source) and price available**

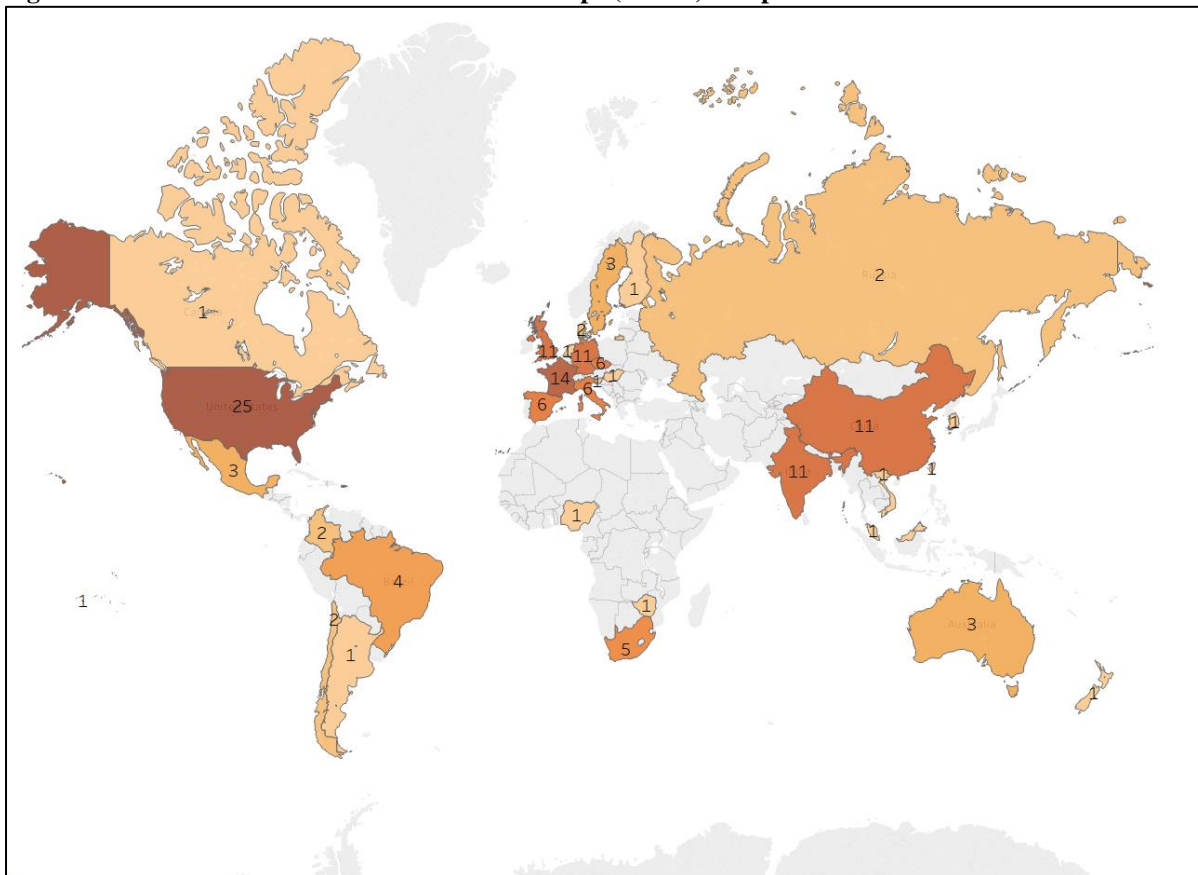

Source: Menstrual Cup Master List, data from 17 September 2018, supplemented with information obtained from experts in the field and web searches. The number in the country indicates the number of brands reporting to be based in that country. Only vaginal cups were included in this figure. We identified 145 menstrual cups with a price available: 141 originated from 32 countries (this map). For 4 menstrual cups the country of origin could not be retrieved.

**Figure S13. Menstrual cup availability in 2018**

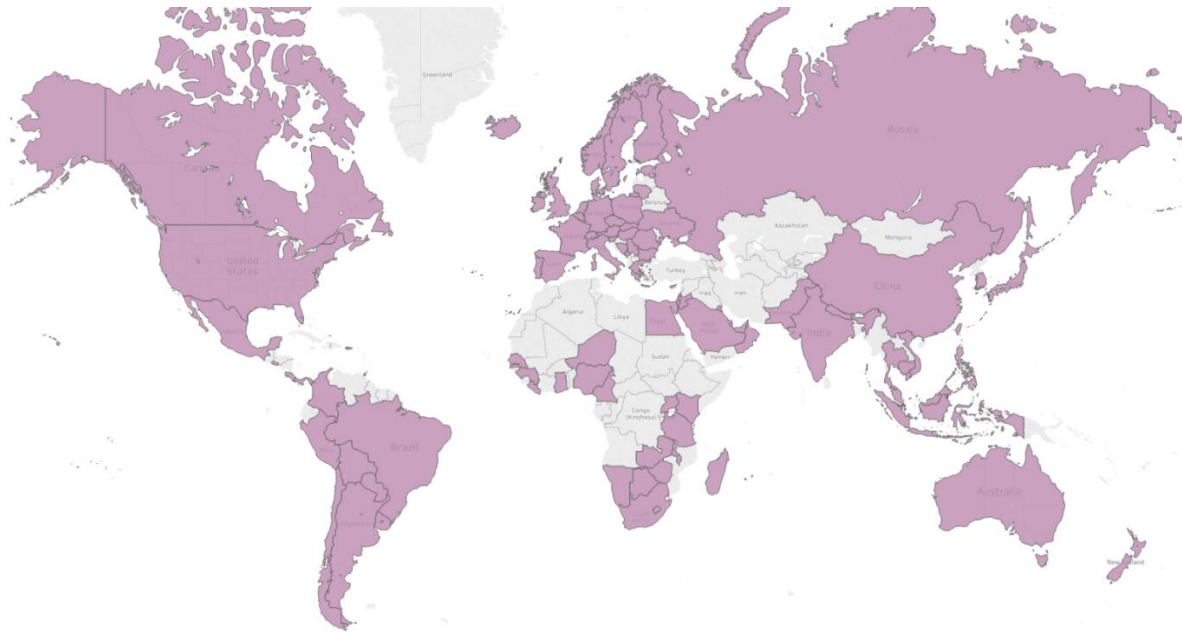

Note: In pink the 99 countries for which we could verify that one or more brands of menstrual cups could be obtained either through the web or in a shop. Only vaginal cups were included in the map. For methods see appendix page 4. Disclaimer: Our internet search may not reflect the local situation in each country.

**Figure S14. Retail price of menstrual cup, by brand**

**S14A. Retail price of menstrual cups based in Europe, by brand (n=65)**

Retail price of menstrual cups based in Europe, by brand

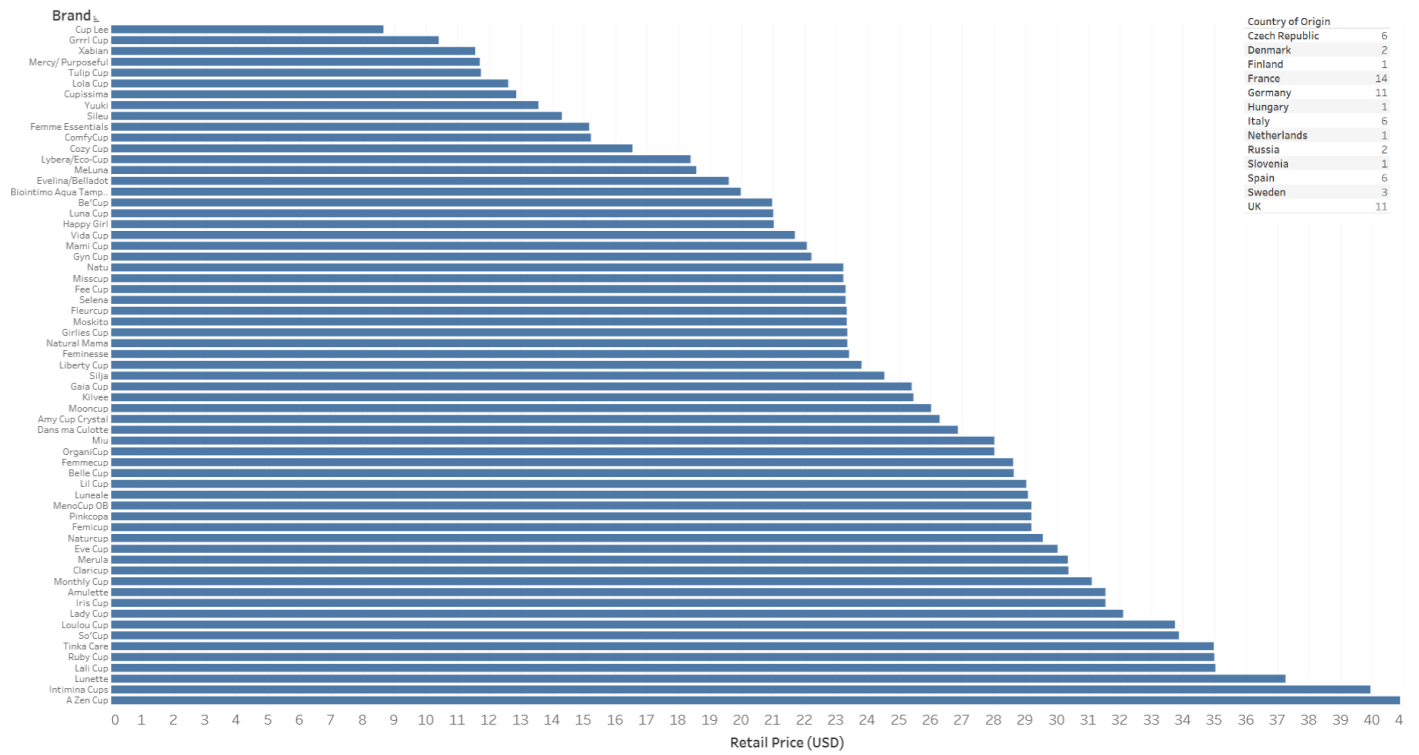

**S14B. Retail price of menstrual cups based in Asia, by brand (n=26)**

Retail price of menstrual cups based in Asia, by brand

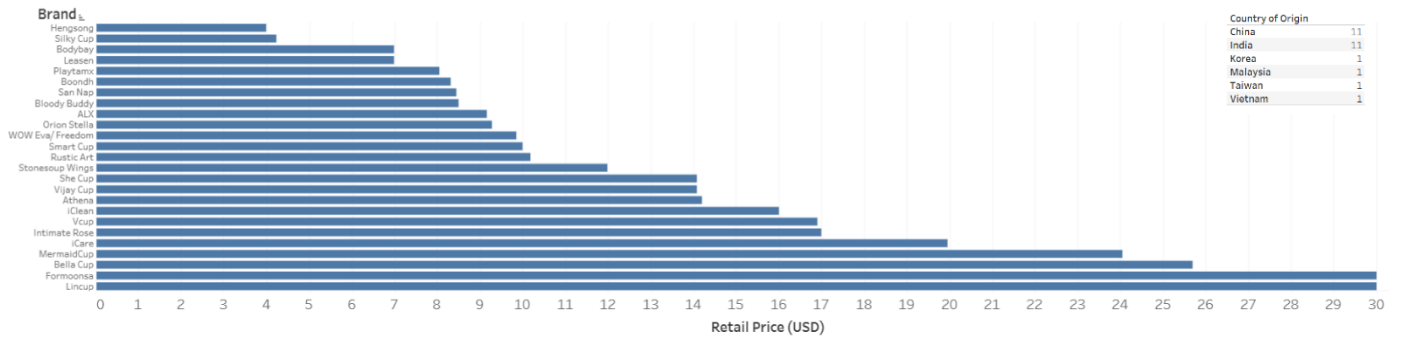



**S14C. Retail price of menstrual cups based in North America, by brand (n=29)**

Retail price of menstrual cups based in North America, by brand

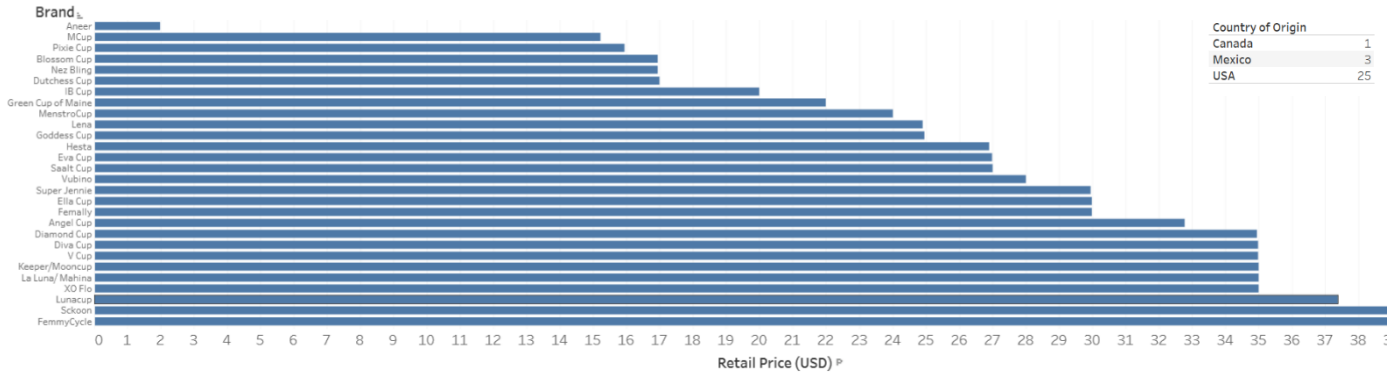

**S14D. Retail price of menstrual cups based in South and Central America, by brand (n=9)**

Retail price of menstrual cups based in South and Central America, by brand

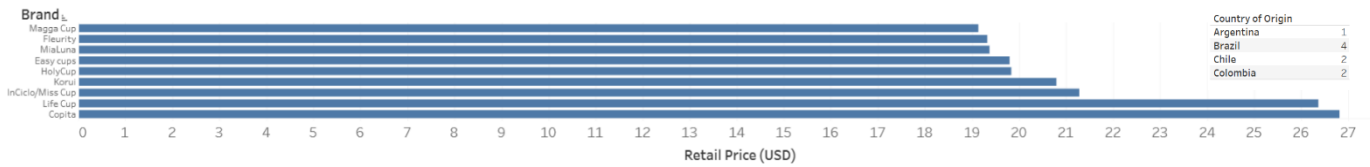

**S14E. Retail price of menstrual cups based in Africa, by brand (n=7)**

Retail price of menstrual cups based in Africa, by brand

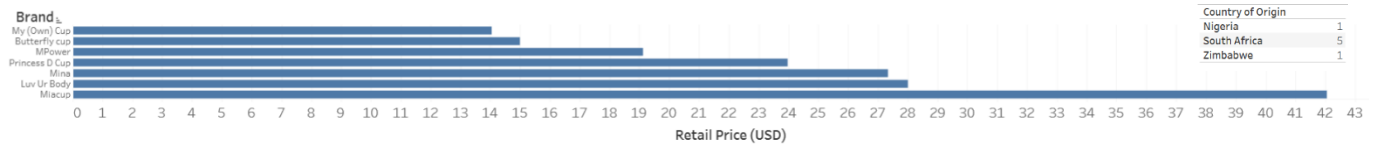

**S14F. Retail price of menstrual cups based in Oceania, by brand (n=5)**

Retail price of menstrual cups based in Oceania, by brand

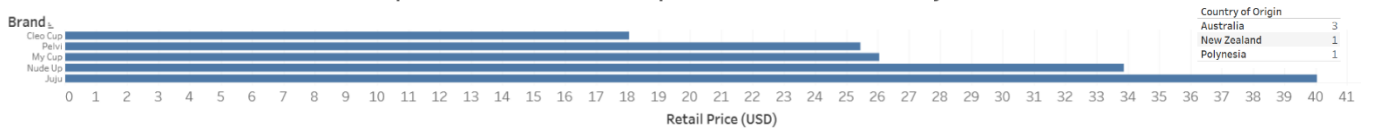

**Figure S15. Retail price of menstrual cup, by Gross National Income per capita of the country**  
**S15A. High income countries (n=100)**

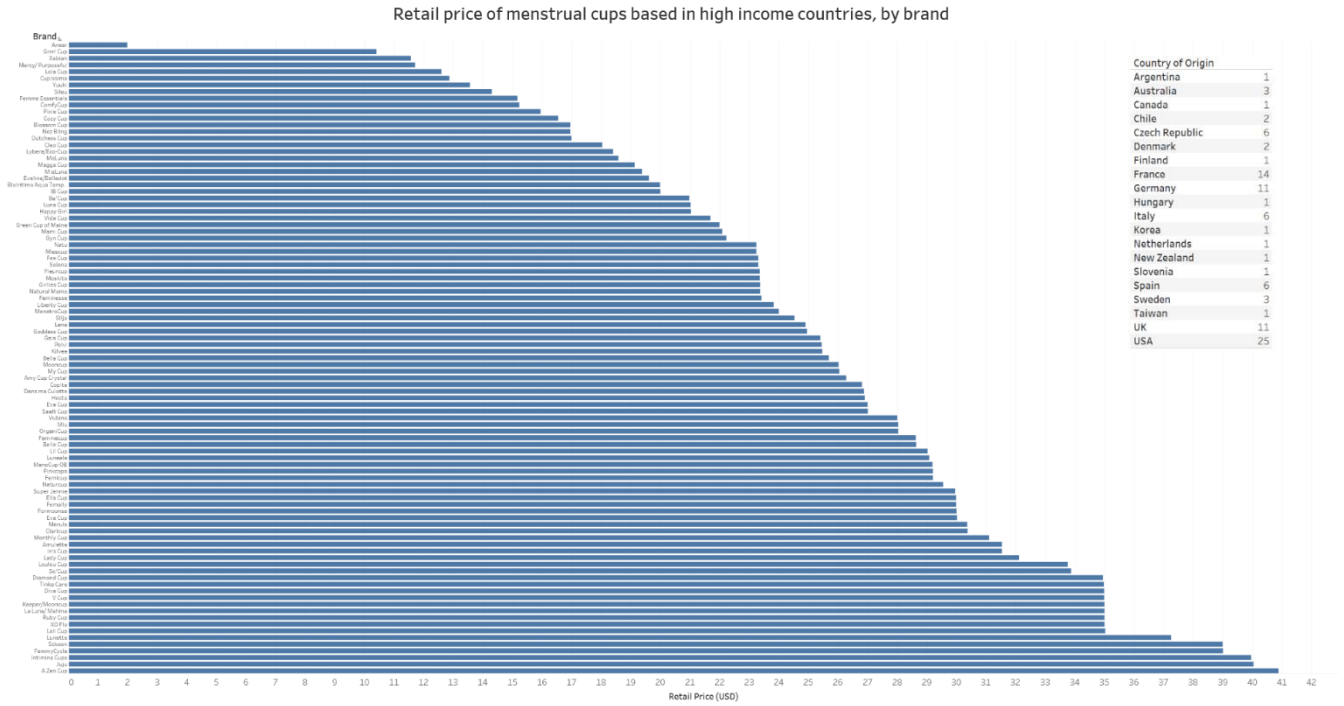

**S15B. Upper-middle income countries (n=28)**

Retail price of menstrual cups based in upper middle income countries, by brand

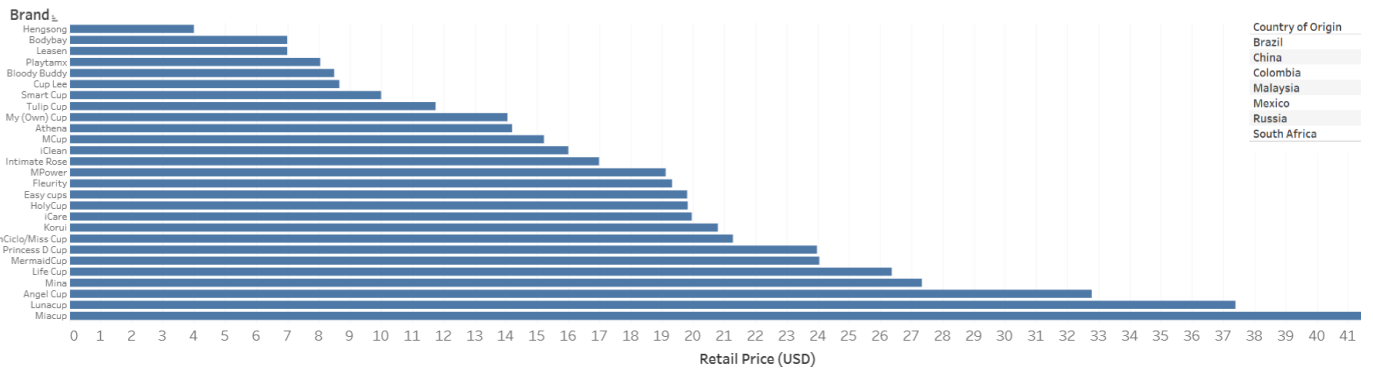

**S15C. Lower-middle income countries (n=14)**

Retail price of menstrual cups based in lower middle income countries, by brand

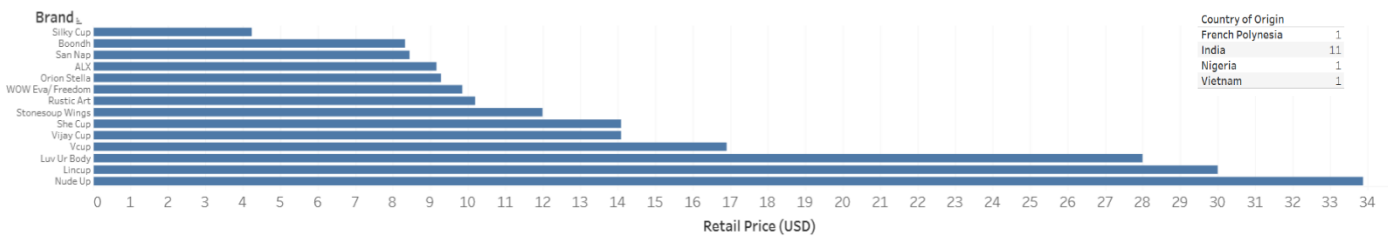

### S15D. Low income countries (n=1)

Retail price of menstrual cups based in low income countries, by brand

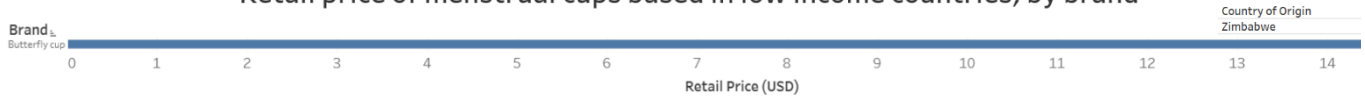

The classification of countries is according to the Atlas method developed by the World Bank which sorts countries by Gross National Income per capita (<https://data.worldbank.org/indicator/NY.GNP.PCAP.CD>). The rankings applied are from 2017. Taiwan was aggregated with high-income countries, and French Polynesia with lower-middle-income countries. The distribution of brands across country wealth quintiles illustrates that menstrual cups are a luxury item most accessible to higher income populations.

**Table S16. Listing of websites used to assess costs and availability of menstrual cups**

| General                   |               |                        | Website                                                                                                                                                                                                                                                                                                                                                                                                                                                                                                                                                                                                                                                                                                                                                                                                                                                                                                                                                                                                                                                                                                                                                                                                                                               |
|---------------------------|---------------|------------------------|-------------------------------------------------------------------------------------------------------------------------------------------------------------------------------------------------------------------------------------------------------------------------------------------------------------------------------------------------------------------------------------------------------------------------------------------------------------------------------------------------------------------------------------------------------------------------------------------------------------------------------------------------------------------------------------------------------------------------------------------------------------------------------------------------------------------------------------------------------------------------------------------------------------------------------------------------------------------------------------------------------------------------------------------------------------------------------------------------------------------------------------------------------------------------------------------------------------------------------------------------------|
| Menstrual Cup Master List |               |                        | <a href="https://menstrualcups.wordpress.com/menstrual-cup-master-list/">https://menstrualcups.wordpress.com/menstrual-cup-master-list/</a>                                                                                                                                                                                                                                                                                                                                                                                                                                                                                                                                                                                                                                                                                                                                                                                                                                                                                                                                                                                                                                                                                                           |
| Brand                     | Price in \$US | Available for purchase | Website                                                                                                                                                                                                                                                                                                                                                                                                                                                                                                                                                                                                                                                                                                                                                                                                                                                                                                                                                                                                                                                                                                                                                                                                                                               |
| A Zen Cup                 | 40.88         | Yes                    | <a href="http://www.azencup.com/shop">http://www.azencup.com/shop</a>                                                                                                                                                                                                                                                                                                                                                                                                                                                                                                                                                                                                                                                                                                                                                                                                                                                                                                                                                                                                                                                                                                                                                                                 |
| ALX                       | 9.17          | Yes                    | <a href="http://alexanderlifecare.com/products-detail.php?product_id=1">http://alexanderlifecare.com/products-detail.php?product_id=1</a>                                                                                                                                                                                                                                                                                                                                                                                                                                                                                                                                                                                                                                                                                                                                                                                                                                                                                                                                                                                                                                                                                                             |
| Amulette                  | 31.54         | Yes                    | <a href="https://www.amulette.it/">https://www.amulette.it/</a>                                                                                                                                                                                                                                                                                                                                                                                                                                                                                                                                                                                                                                                                                                                                                                                                                                                                                                                                                                                                                                                                                                                                                                                       |
| Amy Cup Crystal           | 26.28         | Yes                    | <a href="http://www.amycup.com">http://www.amycup.com</a>                                                                                                                                                                                                                                                                                                                                                                                                                                                                                                                                                                                                                                                                                                                                                                                                                                                                                                                                                                                                                                                                                                                                                                                             |
| Aneer                     | 1.98          | Yes                    | <a href="https://www.aliexpress.com/item/Feminine-Hygiene-Menstrual-Cup-Diva-Cup-Silicone-Coppetta-Mestruale-Coupe-Menstruelle/32494171702.html?spm=2114.search0104.3.2.6bbc479f9jfb06&amp;ws_ab_test=searchweb0_0,searchweb201602_1_10152_10151_10065_10344_10068_10130_10324_10342_10547_10325_10343_10546_5722611_10340_10548_10341_10545_10696_5722911_5722811_5722711_10084_10083_10618_10307_10059_306_100031_10103_10624_10623_10622_10621_10620_5722511,searchweb201603_1,ppcSwitch_3&amp;algo_expid=467e602a-53fb-48e1-8362-95de4fc56368-0&amp;algo_pvid=467e602a-53fb-48e1-8362-95de4fc56368&amp;priceBeautifyAB=0">https://www.aliexpress.com/item/Feminine-Hygiene-Menstrual-Cup-Diva-Cup-Silicone-Coppetta-Mestruale-Coupe-Menstruelle/32494171702.html?spm=2114.search0104.3.2.6bbc479f9jfb06&amp;ws_ab_test=searchweb0_0,searchweb201602_1_10152_10151_10065_10344_10068_10130_10324_10342_10547_10325_10343_10546_5722611_10340_10548_10341_10545_10696_5722911_5722811_5722711_10084_10083_10618_10307_10059_306_100031_10103_10624_10623_10622_10621_10620_5722511,searchweb201603_1,ppcSwitch_3&amp;algo_expid=467e602a-53fb-48e1-8362-95de4fc56368-0&amp;algo_pvid=467e602a-53fb-48e1-8362-95de4fc56368&amp;priceBeautifyAB=0</a> |
| Angel Cup                 | 32.79         | Yes                    | <a href="http://www.angelcupmexico.com">http://www.angelcupmexico.com</a>                                                                                                                                                                                                                                                                                                                                                                                                                                                                                                                                                                                                                                                                                                                                                                                                                                                                                                                                                                                                                                                                                                                                                                             |
| Athena                    | 14.20         | Yes                    | <a href="https://www.amazon.com/Athena-Menstrual-Cup-Recommended-Guaranteed/dp/B010EB67GK?th=1">https://www.amazon.com/Athena-Menstrual-Cup-Recommended-Guaranteed/dp/B010EB67GK?th=1</a>                                                                                                                                                                                                                                                                                                                                                                                                                                                                                                                                                                                                                                                                                                                                                                                                                                                                                                                                                                                                                                                             |
| Bassrose                  | 0.72          | Yes                    | <a href="https://es.aliexpress.com/store/group/Bassrose-Menstrual-cup/316165_504458172.html">https://es.aliexpress.com/store/group/Bassrose-Menstrual-cup/316165_504458172.html</a>                                                                                                                                                                                                                                                                                                                                                                                                                                                                                                                                                                                                                                                                                                                                                                                                                                                                                                                                                                                                                                                                   |
| Be'Cup                    | 20.97         | Yes                    | <a href="http://becup.fr/home/les-produits-becup/">http://becup.fr/home/les-produits-becup/</a>                                                                                                                                                                                                                                                                                                                                                                                                                                                                                                                                                                                                                                                                                                                                                                                                                                                                                                                                                                                                                                                                                                                                                       |
| Bella Cup                 | 25.69         | Yes                    | <a href="http://www.bellacup.co.kr">http://www.bellacup.co.kr</a>                                                                                                                                                                                                                                                                                                                                                                                                                                                                                                                                                                                                                                                                                                                                                                                                                                                                                                                                                                                                                                                                                                                                                                                     |
| Belle Cup                 | 28.63         | Yes                    | <a href="http://www.bellecup.co.uk">http://www.bellecup.co.uk</a>                                                                                                                                                                                                                                                                                                                                                                                                                                                                                                                                                                                                                                                                                                                                                                                                                                                                                                                                                                                                                                                                                                                                                                                     |
| Biointimo Aqua Tampon     | 19.98         | Yes                    | <a href="https://www.bijobolt.hu/webaruhaz/bijo-termekek?mitkeres=biointimo">https://www.bijobolt.hu/webaruhaz/bijo-termekek?mitkeres=biointimo</a>                                                                                                                                                                                                                                                                                                                                                                                                                                                                                                                                                                                                                                                                                                                                                                                                                                                                                                                                                                                                                                                                                                   |
| Bloody Buddy              | 8.50          | Yes                    | <a href="https://www.amazon.com/Bloody-Buddy-Menstrual-Cup-Menstruation/dp/B01MSAWOZX?th=1">https://www.amazon.com/Bloody-Buddy-Menstrual-Cup-Menstruation/dp/B01MSAWOZX?th=1</a>                                                                                                                                                                                                                                                                                                                                                                                                                                                                                                                                                                                                                                                                                                                                                                                                                                                                                                                                                                                                                                                                     |
| Blossom Cup               | 16.95         | Yes                    | <a href="https://www.blossomcup.com/">https://www.blossomcup.com/</a>                                                                                                                                                                                                                                                                                                                                                                                                                                                                                                                                                                                                                                                                                                                                                                                                                                                                                                                                                                                                                                                                                                                                                                                 |
| Bodybay                   | 6.99          | Yes                    | <a href="https://www.amazon.com/Bodybay-Menstrual-Registered-Alternative-Protection/dp/B01LET8F2U">https://www.amazon.com/Bodybay-Menstrual-Registered-Alternative-Protection/dp/B01LET8F2U</a>                                                                                                                                                                                                                                                                                                                                                                                                                                                                                                                                                                                                                                                                                                                                                                                                                                                                                                                                                                                                                                                       |
| Boondh                    | 8.32          | Yes                    | <a href="http://www.boondh.co/home.html">http://www.boondh.co/home.html</a>                                                                                                                                                                                                                                                                                                                                                                                                                                                                                                                                                                                                                                                                                                                                                                                                                                                                                                                                                                                                                                                                                                                                                                           |
| Butterfly cup             | 15.00         | Yes                    | <a href="http://www.thebutterflycup.co.zw">http://www.thebutterflycup.co.zw</a>                                                                                                                                                                                                                                                                                                                                                                                                                                                                                                                                                                                                                                                                                                                                                                                                                                                                                                                                                                                                                                                                                                                                                                       |
| Casco Cup                 | 29.97         | Yes                    | <a href="https://cascoocup.com/buy/">https://cascoocup.com/buy/</a>                                                                                                                                                                                                                                                                                                                                                                                                                                                                                                                                                                                                                                                                                                                                                                                                                                                                                                                                                                                                                                                                                                                                                                                   |
| Claricup                  | 30.37         | Yes                    | <a href="http://www.claripharm.com/fr/products">http://www.claripharm.com/fr/products</a>                                                                                                                                                                                                                                                                                                                                                                                                                                                                                                                                                                                                                                                                                                                                                                                                                                                                                                                                                                                                                                                                                                                                                             |
| Cleo Cup                  | 18.04         | Yes                    | <a href="https://cleo-cup.myshopify.com/">https://cleo-cup.myshopify.com/</a>                                                                                                                                                                                                                                                                                                                                                                                                                                                                                                                                                                                                                                                                                                                                                                                                                                                                                                                                                                                                                                                                                                                                                                         |
| ComfyCup                  | 15.23         | Yes                    | <a href="https://www.amazon.co.uk/ComfyCup-Menstrual-Cup-Small-Size/dp/B00CQJGDS/ref=sr_1_3?ie=UTF8&amp;qid=1421289897&amp;sr=8-3&amp;keywords=comfyCup">https://www.amazon.co.uk/ComfyCup-Menstrual-Cup-Small-Size/dp/B00CQJGDS/ref=sr_1_3?ie=UTF8&amp;qid=1421289897&amp;sr=8-3&amp;keywords=comfyCup</a>                                                                                                                                                                                                                                                                                                                                                                                                                                                                                                                                                                                                                                                                                                                                                                                                                                                                                                                                           |
| Copita                    | 26.81         | Yes                    | <a href="http://www.copitamenstrual.cl">http://www.copitamenstrual.cl</a>                                                                                                                                                                                                                                                                                                                                                                                                                                                                                                                                                                                                                                                                                                                                                                                                                                                                                                                                                                                                                                                                                                                                                                             |
| Cozy Cup                  | 16.54         | Yes                    | <a href="https://www.amazon.co.uk/Menstrual-CozyCup-CLASSIC-Medical-Silicone/dp/6040125934/ref=sr_1_1_s_it?s=drugstore&amp;ie=UTF8&amp;qid=1507900762&amp;sr=1-1&amp;keywords=CozyCup">https://www.amazon.co.uk/Menstrual-CozyCup-CLASSIC-Medical-Silicone/dp/6040125934/ref=sr_1_1_s_it?s=drugstore&amp;ie=UTF8&amp;qid=1507900762&amp;sr=1-1&amp;keywords=CozyCup</a>                                                                                                                                                                                                                                                                                                                                                                                                                                                                                                                                                                                                                                                                                                                                                                                                                                                                               |
| Cup Lee                   | 8.66          | Yes                    | <a href="http://cuplee.ru">http://cuplee.ru</a>                                                                                                                                                                                                                                                                                                                                                                                                                                                                                                                                                                                                                                                                                                                                                                                                                                                                                                                                                                                                                                                                                                                                                                                                       |
| Cupissima                 | 12.87         | Yes                    | <a href="http://www.cupissima.com/index_fr.html">http://www.cupissima.com/index_fr.html</a>                                                                                                                                                                                                                                                                                                                                                                                                                                                                                                                                                                                                                                                                                                                                                                                                                                                                                                                                                                                                                                                                                                                                                           |
| Dans ma Culotte           | 26.87         | Yes                    | <a href="http://dansmaculotte.com/en/">http://dansmaculotte.com/en/</a>                                                                                                                                                                                                                                                                                                                                                                                                                                                                                                                                                                                                                                                                                                                                                                                                                                                                                                                                                                                                                                                                                                                                                                               |
| Diamond Cup               | 34.95         | Yes                    | <a href="http://www.mydiamondcup.com/store/p4/p.html">http://www.mydiamondcup.com/store/p4/p.html</a>                                                                                                                                                                                                                                                                                                                                                                                                                                                                                                                                                                                                                                                                                                                                                                                                                                                                                                                                                                                                                                                                                                                                                 |
| Diva Cup                  | 34.99         | Yes                    | <a href="http://www.divacup.com">http://www.divacup.com</a>                                                                                                                                                                                                                                                                                                                                                                                                                                                                                                                                                                                                                                                                                                                                                                                                                                                                                                                                                                                                                                                                                                                                                                                           |
| Dutchess Cup              | 16.99         | Yes                    | <a href="https://pelvichealthshop.com/collections/all">https://pelvichealthshop.com/collections/all</a>                                                                                                                                                                                                                                                                                                                                                                                                                                                                                                                                                                                                                                                                                                                                                                                                                                                                                                                                                                                                                                                                                                                                               |
| Easy cups                 | 19.80         | Yes                    | <a href="http://www.easycups.ca/easycup/shop/">http://www.easycups.ca/easycup/shop/</a>                                                                                                                                                                                                                                                                                                                                                                                                                                                                                                                                                                                                                                                                                                                                                                                                                                                                                                                                                                                                                                                                                                                                                               |
| Ella Cup                  | 29.99         | Yes                    | <a href="https://www.ellacup.com/">https://www.ellacup.com/</a>                                                                                                                                                                                                                                                                                                                                                                                                                                                                                                                                                                                                                                                                                                                                                                                                                                                                                                                                                                                                                                                                                                                                                                                       |
| Eva Cup                   | 26.99         | Yes                    | <a href="https://www.anigan.com/products/anigan-evacup-single-pack">https://www.anigan.com/products/anigan-evacup-single-pack</a>                                                                                                                                                                                                                                                                                                                                                                                                                                                                                                                                                                                                                                                                                                                                                                                                                                                                                                                                                                                                                                                                                                                     |
| Eve Cup                   | 32.71         | Yes                    | <a href="http://www.nalayachakana.com/eve-cup/">http://www.nalayachakana.com/eve-cup/</a>                                                                                                                                                                                                                                                                                                                                                                                                                                                                                                                                                                                                                                                                                                                                                                                                                                                                                                                                                                                                                                                                                                                                                             |
| Eve Cup                   | 27.33         | Yes                    | <a href="http://www.evecups.uk/why-the-eve-cup/">http://www.evecups.uk/why-the-eve-cup/</a>                                                                                                                                                                                                                                                                                                                                                                                                                                                                                                                                                                                                                                                                                                                                                                                                                                                                                                                                                                                                                                                                                                                                                           |
| Evelina/Belladot          | 19.61         | Yes                    | <a href="http://www.belladot.com/products/evelina-menstrual-cup">http://www.belladot.com/products/evelina-menstrual-cup</a>                                                                                                                                                                                                                                                                                                                                                                                                                                                                                                                                                                                                                                                                                                                                                                                                                                                                                                                                                                                                                                                                                                                           |
| Fee Cup                   | 23.30         | Yes                    | <a href="https://feecup.de/onlineshop/menstruationstasse-classic/">https://feecup.de/onlineshop/menstruationstasse-classic/</a>                                                                                                                                                                                                                                                                                                                                                                                                                                                                                                                                                                                                                                                                                                                                                                                                                                                                                                                                                                                                                                                                                                                       |
| Female Cup                | 46.72         | Yes                    | <a href="http://femalecup.com/products/">http://femalecup.com/products/</a>                                                                                                                                                                                                                                                                                                                                                                                                                                                                                                                                                                                                                                                                                                                                                                                                                                                                                                                                                                                                                                                                                                                                                                           |
| Femally                   | 29.99         | Yes                    | <a href="https://www.femallay.com/collections/healthy-menstrual-care/products/femallay-easy-empty-menstrual-cup">https://www.femallay.com/collections/healthy-menstrual-care/products/femallay-easy-empty-menstrual-cup</a>                                                                                                                                                                                                                                                                                                                                                                                                                                                                                                                                                                                                                                                                                                                                                                                                                                                                                                                                                                                                                           |
| Femicup                   | 29.20         | Yes                    | <a href="http://www.femicup.com/content/18-comprar-femicup">http://www.femicup.com/content/18-comprar-femicup</a>                                                                                                                                                                                                                                                                                                                                                                                                                                                                                                                                                                                                                                                                                                                                                                                                                                                                                                                                                                                                                                                                                                                                     |

|                    |       |     |                                                                                                                                                                                                                                                                                                                                                                                                                                                                           |
|--------------------|-------|-----|---------------------------------------------------------------------------------------------------------------------------------------------------------------------------------------------------------------------------------------------------------------------------------------------------------------------------------------------------------------------------------------------------------------------------------------------------------------------------|
| Feminesse          | 23.42 | Yes | <a href="https://feminesse.co.uk/product/feminesse-menstrual-cup/">https://feminesse.co.uk/product/feminesse-menstrual-cup/</a>                                                                                                                                                                                                                                                                                                                                           |
| Femme Essentials   | 15.17 | Yes | <a href="https://www.amazon.de/Femme-Essentials-Menstruationstasse-Menstruationskappe-medizinischem/dp/B012BNU3CS">https://www.amazon.de/Femme-Essentials-Menstruationstasse-Menstruationskappe-medizinischem/dp/B012BNU3CS</a>                                                                                                                                                                                                                                           |
| Femmecup           | 28.62 | Yes | <a href="http://www.femmecup.com">http://www.femmecup.com</a>                                                                                                                                                                                                                                                                                                                                                                                                             |
| FemmyCycle         | 39.00 | Yes | <a href="https://femmycycle.com/">https://femmycycle.com/</a>                                                                                                                                                                                                                                                                                                                                                                                                             |
| Fleurple           | 23.35 | Yes | <a href="http://fleurple.com">http://fleurple.com</a>                                                                                                                                                                                                                                                                                                                                                                                                                     |
| Fleurity           | 19.32 | Yes | <a href="http://fleurity.com.br">http://fleurity.com.br</a>                                                                                                                                                                                                                                                                                                                                                                                                               |
| Formoonsa          | 30.00 | Yes | <a href="https://www.formoonsacup.com/english">https://www.formoonsacup.com/english</a>                                                                                                                                                                                                                                                                                                                                                                                   |
| Gaia Cup           | 25.40 | Yes | <a href="http://www.gaiacup.com">http://www.gaiacup.com</a>                                                                                                                                                                                                                                                                                                                                                                                                               |
| Girlies Cup        | 23.36 | Yes | <a href="http://www.girlies-cup.com/">http://www.girlies-cup.com/</a>                                                                                                                                                                                                                                                                                                                                                                                                     |
| Goddess Cup        | 24.95 | Yes | <a href="https://www.goddesshealthco.com/collections/the-goddess-cups">https://www.goddesshealthco.com/collections/the-goddess-cups</a>                                                                                                                                                                                                                                                                                                                                   |
| Green Cup of Maine | 21.99 | Yes | <a href="http://www.greencupofmaine.com/">http://www.greencupofmaine.com/</a>                                                                                                                                                                                                                                                                                                                                                                                             |
| GRRRL Cup          | 10.40 | Yes | <a href="https://www.amazon.co.uk/dp/B0728NVJ7H?psc=1">https://www.amazon.co.uk/dp/B0728NVJ7H?psc=1</a>                                                                                                                                                                                                                                                                                                                                                                   |
| Gyn Cup            | 22.22 | Yes | <a href="http://www.mujskalisek.cz/">http://www.mujskalisek.cz/</a>                                                                                                                                                                                                                                                                                                                                                                                                       |
| Happy Girl         | 21.03 | Yes | <a href="https://www.remede-naturel.net/en/our-natural-products/158-happy-girl-cup-coupe-menstruelle-.html">https://www.remede-naturel.net/en/our-natural-products/158-happy-girl-cup-coupe-menstruelle-.html</a>                                                                                                                                                                                                                                                         |
| Hengsong           | 3.99  | Yes | <a href="https://www.amazon.com/Hengsong-Reusable-Feminine-Protection-Menstrual/dp/B00PDFYGCA/ref=pd_sim_121_3?ie=UTF8&amp;dpID=3115dgRCTbL&amp;dpSrc=sims&amp;preST=_A_C_UL160_SR160%2C160_&amp;psc=1&amp;refRID=2WDW586WZQF7PDZG1SG8">https://www.amazon.com/Hengsong-Reusable-Feminine-Protection-Menstrual/dp/B00PDFYGCA/ref=pd_sim_121_3?ie=UTF8&amp;dpID=3115dgRCTbL&amp;dpSrc=sims&amp;preST=_A_C_UL160_SR160%2C160_&amp;psc=1&amp;refRID=2WDW586WZQF7PDZG1SG8</a> |
| Hesta              | 26.90 | Yes | <a href="https://www.hestaorganic.com/product-category/menstrual-cup/">https://www.hestaorganic.com/product-category/menstrual-cup/</a>                                                                                                                                                                                                                                                                                                                                   |
| HolyCup            | 19.83 | Yes | <a href="http://holycup.com.br/">http://holycup.com.br/</a>                                                                                                                                                                                                                                                                                                                                                                                                               |
| IB Cup             | 19.99 | Yes | <a href="http://improvingbirth.org/product/ib-menstrual-cup/">http://improvingbirth.org/product/ib-menstrual-cup/</a>                                                                                                                                                                                                                                                                                                                                                     |
| iCare              | 19.95 | Yes | <a href="https://www.icare-menstrual-cup.com/#order-now">https://www.icare-menstrual-cup.com/#order-now</a>                                                                                                                                                                                                                                                                                                                                                               |
| iClean             | 16.00 | Yes | <a href="https://www.ebay.com/p/iClean-Medical-Grade-Silicone-Reusable-Menstrual-Period-Cup-2x-large/935300630">https://www.ebay.com/p/iClean-Medical-Grade-Silicone-Reusable-Menstrual-Period-Cup-2x-large/935300630</a>                                                                                                                                                                                                                                                 |
| InCiclo/Miss Cup   | 21.28 | Yes | <a href="http://www.inciclo.com.br">www.inciclo.com.br</a>                                                                                                                                                                                                                                                                                                                                                                                                                |
| Intimate Rose      | 16.99 | Yes | <a href="https://www.intimaterose.com/products/rose-cup-menstrual-cup-by-intimate-rose-fda-registered-reusable-body-safe-medical-silicone-alternative-to-tampons-pads-heavy-light-flow-period">https://www.intimaterose.com/products/rose-cup-menstrual-cup-by-intimate-rose-fda-registered-reusable-body-safe-medical-silicone-alternative-to-tampons-pads-heavy-light-flow-period</a>                                                                                   |
| Intimina Cups      | 39.95 | Yes | <a href="http://www.intimina.com/en/lily_cup_pd.php">http://www.intimina.com/en/lily_cup_pd.php</a>                                                                                                                                                                                                                                                                                                                                                                       |
| Iris Cup           | 31.54 | Yes | <a href="http://www.iriscup.com">www.iriscup.com</a>                                                                                                                                                                                                                                                                                                                                                                                                                      |
| Juju               | 40.04 | Yes | <a href="http://www.juju.com.au">http://www.juju.com.au</a>                                                                                                                                                                                                                                                                                                                                                                                                               |
| Keeper/Mooncup     | 35.00 | Yes | <a href="http://www.keeper.com">http://www.keeper.com</a>                                                                                                                                                                                                                                                                                                                                                                                                                 |
| Kilvee             | 25.46 | Yes | <a href="https://www.klivee.com/">https://www.klivee.com/</a>                                                                                                                                                                                                                                                                                                                                                                                                             |
| Korui              | 20.80 | Yes | <a href="http://www.korui.com.br/">http://www.korui.com.br/</a>                                                                                                                                                                                                                                                                                                                                                                                                           |
| La Luna/ Mahina    | 35.00 | Yes | <a href="http://www.mysacredcycle.com/home/">http://www.mysacredcycle.com/home/</a>                                                                                                                                                                                                                                                                                                                                                                                       |
| Lady Cup           | 32.11 | Yes | <a href="http://www.ladycup.eu">http://www.ladycup.eu</a>                                                                                                                                                                                                                                                                                                                                                                                                                 |
| Lali Cup           | 35.03 | Yes | <a href="http://lalicup.si">http://lalicup.si</a>                                                                                                                                                                                                                                                                                                                                                                                                                         |
| Leasen             | 6.99  | Yes | <a href="https://www.amazon.com/LEASEN-Health-Silicone-Menstrual-Period/dp/B016RHOWUI">https://www.amazon.com/LEASEN-Health-Silicone-Menstrual-Period/dp/B016RHOWUI</a>                                                                                                                                                                                                                                                                                                   |
| Lena               | 24.90 | Yes | <a href="http://www.lenacup.com">http://www.lenacup.com</a>                                                                                                                                                                                                                                                                                                                                                                                                               |
| Liberty Cup        | 23.82 | Yes | <a href="https://www.cocooncenter.co.uk/liberty-cup-menstrual-cup-size-2/22793.html">https://www.cocooncenter.co.uk/liberty-cup-menstrual-cup-size-2/22793.html</a>                                                                                                                                                                                                                                                                                                       |
| Life Cup           | 26.37 | Yes | <a href="http://lifecup.co/en/comprar/">http://lifecup.co/en/comprar/</a>                                                                                                                                                                                                                                                                                                                                                                                                 |
| Lil Cup            | 29.02 | Yes | <a href="http://www.menstruacni-kalisek.cz/15-menstruacni-kalisky-lilcup-od-199-kc">http://www.menstruacni-kalisek.cz/15-menstruacni-kalisky-lilcup-od-199-kc</a>                                                                                                                                                                                                                                                                                                         |
| Lincup             | 30.00 | Yes | <a href="http://us.lintimate.net/lincup">http://us.lintimate.net/lincup</a>                                                                                                                                                                                                                                                                                                                                                                                               |
| Lola Cup           | 12.60 | Yes | <a href="http://lolaperiodcup.com/#chisiamo">http://lolaperiodcup.com/#chisiamo</a>                                                                                                                                                                                                                                                                                                                                                                                       |
| Loulou Cup         | 33.76 | Yes | <a href="https://www.en.louloucup.com/">https://www.en.louloucup.com/</a>                                                                                                                                                                                                                                                                                                                                                                                                 |
| Luna Cup           | 21.01 | Yes | <a href="http://www.menstruacnykalisokluna.sk/eshop/">http://www.menstruacnykalisokluna.sk/eshop/</a>                                                                                                                                                                                                                                                                                                                                                                     |
| Lunacup            | 37.38 | Yes | <a href="http://lunacup.mx">http://lunacup.mx</a>                                                                                                                                                                                                                                                                                                                                                                                                                         |
| Luneale            | 29.08 | Yes | <a href="https://www.lacupluneale.com/">https://www.lacupluneale.com/</a>                                                                                                                                                                                                                                                                                                                                                                                                 |
| Lunette            | 37.25 | Yes | <a href="http://www.lunette.com">http://www.lunette.com</a>                                                                                                                                                                                                                                                                                                                                                                                                               |
| Luv Ur Body        | 28.00 | Yes | <a href="http://lurvur-body.com">http://lurvur-body.com</a>                                                                                                                                                                                                                                                                                                                                                                                                               |
| Lybera/Eco-Cup     | 18.40 | Yes | <a href="http://www.lybera.it">http://www.lybera.it</a>                                                                                                                                                                                                                                                                                                                                                                                                                   |
| Magga Cup          | 19.13 | Yes | <a href="http://maggacup.com.ar">http://maggacup.com.ar</a>                                                                                                                                                                                                                                                                                                                                                                                                               |
| Mami Cup           | 22.08 | Yes | <a href="http://www.coppetta-mestruale.com">http://www.coppetta-mestruale.com</a>                                                                                                                                                                                                                                                                                                                                                                                         |

|                   |       |     |                                                                                                                                                                                                                                       |
|-------------------|-------|-----|---------------------------------------------------------------------------------------------------------------------------------------------------------------------------------------------------------------------------------------|
| MCup              | 15.21 | Yes | <a href="https://mcup.com.mx/web/tienda/">https://mcup.com.mx/web/tienda/</a>                                                                                                                                                         |
| MeLuna            | 18.57 | Yes | <a href="https://www.me-luna.eu/en_GB">https://www.me-luna.eu/en_GB</a>                                                                                                                                                               |
| MenoCup OB        | 29.19 | Yes | <a href="http://www.menocup-ob.de/english/">http://www.menocup-ob.de/english/</a>                                                                                                                                                     |
| MenstroCup        | 24.00 | Yes | <a href="http://www.menstrocup.com/product/menstrocup-from-femogene/">http://www.menstrocup.com/product/menstrocup-from-femogene/</a>                                                                                                 |
| Mercy/ Purposeful | 11.70 | Yes | <a href="https://www.amazon.co.uk/Mercy-Menstrual-Cup-environment-childbirth/dp/B00Y8OLK">https://www.amazon.co.uk/Mercy-Menstrual-Cup-environment-childbirth/dp/B00Y8OLK</a>                                                         |
| MermaidCup        | 24.05 | Yes | <a href="http://cottonmermaid.com/mermaidcup-menstrual-cup/">http://cottonmermaid.com/mermaidcup-menstrual-cup/</a>                                                                                                                   |
| Merula            | 30.36 | Yes | <a href="http://www.merula-cup.de">http://www.merula-cup.de</a>                                                                                                                                                                       |
| Miacup            | 42.05 | Yes | <a href="http://www.rethinkthetampon.co.za">www.rethinkthetampon.co.za</a>                                                                                                                                                            |
| MiaLuna           | 19.37 | Yes | <a href="http://mialuna.cl/">http://mialuna.cl/</a>                                                                                                                                                                                   |
| Mina              | 27.34 | Yes | <a href="https://minacup.org/">https://minacup.org/</a>                                                                                                                                                                               |
| Misscup           | 23.24 | Yes | <a href="https://www.misscup.fr/produit/misscup-rose/">https://www.misscup.fr/produit/misscup-rose/</a>                                                                                                                               |
| Miu               | 28.03 | Yes | <a href="https://miu-cup.com">https://miu-cup.com</a>                                                                                                                                                                                 |
| Monthly Cup       | 31.11 | Yes | <a href="https://www.menstrualcup.com/gb">https://www.menstrualcup.com/gb</a>                                                                                                                                                         |
| Mooncup           | 26.02 | Yes | <a href="http://www.mooncup.co.uk">http://www.mooncup.co.uk</a>                                                                                                                                                                       |
| Moskito           | 23.35 | Yes | <a href="http://www.lumunu.de/search/moskito?row=0">http://www.lumunu.de/search/moskito?row=0</a>                                                                                                                                     |
| MPower            | 19.11 | Yes | <a href="http://mpowercup.co.za/">http://mpowercup.co.za/</a>                                                                                                                                                                         |
| My (Own) Cup      | 14.04 | Yes | <a href="http://www.myowncup.co.za">http://www.myowncup.co.za</a>                                                                                                                                                                     |
| My Cup            | 26.04 | Yes | <a href="http://www.mycup.co.nz/menstrual-cups/">http://www.mycup.co.nz/menstrual-cups/</a>                                                                                                                                           |
| Natu              | 23.23 | Yes | <a href="http://www.natulovesyou.com/">http://www.natulovesyou.com/</a>                                                                                                                                                               |
| Natural Mama      | 23.36 | Yes | <a href="http://www.pannolinilavabili.org/">http://www.pannolinilavabili.org/</a>                                                                                                                                                     |
| Naturcup          | 29.55 | Yes | <a href="http://www.naturcup.com">http://www.naturcup.com</a>                                                                                                                                                                         |
| Nez Bling         | 16.95 | Yes | <a href="https://nezbling.com/products/menstrual-cup">https://nezbling.com/products/menstrual-cup</a>                                                                                                                                 |
| Nude Up           | 33.87 | Yes | <a href="http://nudeup.co/en/product/nudeup-lagoon-blue/">http://nudeup.co/en/product/nudeup-lagoon-blue/</a>                                                                                                                         |
| OrganiCup         | 28.03 | Yes | <a href="http://www.organicup.eu">http://www.organicup.eu</a>                                                                                                                                                                         |
| Orion Stella      | 9.28  | Yes | <a href="https://www.snapdeal.com/brand/orion-stella/feminine-hygiene-menstrual-cups">https://www.snapdeal.com/brand/orion-stella/feminine-hygiene-menstrual-cups</a>                                                                 |
| Pelvi             | 25.44 | Yes | <a href="https://pelvi.com/collections/all/products/menstrual-cup">https://pelvi.com/collections/all/products/menstrual-cup</a>                                                                                                       |
| Pinkcopa          | 29.20 | Yes | <a href="http://www.pinkcopa.com">http://www.pinkcopa.com</a>                                                                                                                                                                         |
| Pixie Cup         | 15.95 | Yes | <a href="https://www.pixiecup.com/collections/all">https://www.pixiecup.com/collections/all</a>                                                                                                                                       |
| Playtamx          | 8.04  | Yes | <a href="https://www.tmall.com/mlist/regular_U3rJhD30cV5lmhks4w6UACbjK5xmHBvUiaALdBkA2o.html">https://www.tmall.com/mlist/regular_U3rJhD30cV5lmhks4w6UACbjK5xmHBvUiaALdBkA2o.html</a>                                                 |
| Princess D Cup    | 23.98 | Yes | <a href="http://www.princessmenstrualcup.com/PrincessD%20Flyer_Caster%20Semanya_2017.pdf">http://www.princessmenstrualcup.com/PrincessD%20Flyer_Caster%20Semanya_2017.pdf</a>                                                         |
| Ruby Cup          | 35.00 | Yes | <a href="http://www.ruby-cup.com">http://www.ruby-cup.com</a>                                                                                                                                                                         |
| Rustic Art        | 10.19 | Yes | <a href="http://www.rusticart.in/choose-a-cup/">http://www.rusticart.in/choose-a-cup/</a>                                                                                                                                             |
| Saalt Cup         | 27.00 | Yes | <a href="https://www.saaltco.com/shop/saalt-cup-small/">https://www.saaltco.com/shop/saalt-cup-small/</a>                                                                                                                             |
| San Nap           | 8.45  | Yes | <a href="http://www.nykaa.com/sannap-menstrual-cup.html">http://www.nykaa.com/sannap-menstrual-cup.html</a>                                                                                                                           |
| Sckoon            | 38.99 | Yes | <a href="http://sckooncup.com">http://sckooncup.com</a>                                                                                                                                                                               |
| Selena            | 23.30 | Yes | <a href="http://www.selenacup.at/en/">http://www.selenacup.at/en/</a>                                                                                                                                                                 |
| She Cup           | 14.09 | Yes | <a href="http://www.shecup.com/">http://www.shecup.com/</a>                                                                                                                                                                           |
| Sileu             | 14.30 | Yes | <a href="http://sileu.com/en/cup/sileu-violet-menstrual-cup-made-from-medical-grade-silicone-reusable-model-soft/">http://sileu.com/en/cup/sileu-violet-menstrual-cup-made-from-medical-grade-silicone-reusable-model-soft/</a>       |
| Silja             | 24.53 | Yes | <a href="http://www.silja-cup.com/epages/79109918.sf/de_DE/?ObjectPath=%2FShops%2F79109918%2FCategories%2FSilja_Shop">http://www.silja-cup.com/epages/79109918.sf/de_DE/?ObjectPath=%2FShops%2F79109918%2FCategories%2FSilja_Shop</a> |
| Silky Cup         | 4.23  | Yes | <a href="http://www.silkycup.com">http://www.silkycup.com</a>                                                                                                                                                                         |
| Smart Cup         | 9.99  | Yes | <a href="https://www.amazon.com/Smart-Cup-Menstrual-Period-Childbirth/dp/B00WCDUL8E?th=1">https://www.amazon.com/Smart-Cup-Menstrual-Period-Childbirth/dp/B00WCDUL8E?th=1</a>                                                         |
| So'Cup            | 33.87 | Yes | <a href="https://socup.fr/boutique-2">https://socup.fr/boutique-2</a>                                                                                                                                                                 |
| Stonesoup Wings   | 11.99 | Yes | <a href="https://stonesoup.in/pages/stonesoup-wings">https://stonesoup.in/pages/stonesoup-wings</a>                                                                                                                                   |
| Super Jennie      | 29.95 | Yes | <a href="http://www.superjennie.com">http://www.superjennie.com</a>                                                                                                                                                                   |
| Tinka Care        | 34.98 | Yes | <a href="http://www.tinkacare.de/">http://www.tinkacare.de/</a>                                                                                                                                                                       |
| Tulip Cup         | 11.74 | Yes | <a href="http://vagiton.ru/kapa">http://vagiton.ru/kapa</a>                                                                                                                                                                           |
| V Cup             | 34.99 | Yes | <a href="https://v-cups.com/collections/all">https://v-cups.com/collections/all</a>                                                                                                                                                   |
| Vcup              | 16.91 | Yes | <a href="http://vcup.co.in/index.php">http://vcup.co.in/index.php</a>                                                                                                                                                                 |

|                     |       |     |                                                                                                                                                                                                                                                                                                                                                                               |
|---------------------|-------|-----|-------------------------------------------------------------------------------------------------------------------------------------------------------------------------------------------------------------------------------------------------------------------------------------------------------------------------------------------------------------------------------|
| Vida Cup            | 21.69 | Yes | <a href="http://www.medihealth1.com/">http://www.medihealth1.com/</a>                                                                                                                                                                                                                                                                                                         |
| Vijay Cup           | 14.09 | Yes | <a href="https://www.amazon.in/Menstrual-Vijay-Cup-Foldable-Reusable/dp/B01H90EV08">https://www.amazon.in/Menstrual-Vijay-Cup-Foldable-Reusable/dp/B01H90EV08</a>                                                                                                                                                                                                             |
| Vubino              | 28.00 | Yes | <a href="http://vubino.com/">http://vubino.com/</a>                                                                                                                                                                                                                                                                                                                           |
| WOW Eva/<br>Freedom | 9.86  | Yes | <a href="http://www.nykaa.com/wow-eva-reusable-menstrual-cup-wash-size-m-under-30-year.html?ptype=product&amp;id=35022">http://www.nykaa.com/wow-eva-reusable-menstrual-cup-wash-size-m-under-30-year.html?ptype=product&amp;id=35022</a>                                                                                                                                     |
| Xabian              | 11.56 | Yes | <a href="https://www.amazon.de/Menstruationstasse-Xabian-medizinisches-Silikon-Gr%C3%B6%C3%9Fenauswahl/dp/B0177P2Q48">https://www.amazon.de/Menstruationstasse-Xabian-medizinisches-Silikon-Gr%C3%B6%C3%9Fenauswahl/dp/B0177P2Q48</a>                                                                                                                                         |
| XO Flo              | 35.00 | Yes | <a href="https://gladrags.com/product/451/XO-Flo.html">https://gladrags.com/product/451/XO-Flo.html</a>                                                                                                                                                                                                                                                                       |
| Yuuki               | 13.56 | Yes | <a href="http://www.yuuki.cz">http://www.yuuki.cz</a>                                                                                                                                                                                                                                                                                                                         |
| Charlene            | 19.00 | Yes | <a href="https://www.amazon.com/dp/B00TACX6LY?psc=1">https://www.amazon.com/dp/B00TACX6LY?psc=1</a>                                                                                                                                                                                                                                                                           |
| Diggold             | 19.77 | Yes | <a href="https://www.amazon.com/Menstrual-Cup-FDA-Registered-Alternative/dp/B0718X4DML?th=1">https://www.amazon.com/Menstrual-Cup-FDA-Registered-Alternative/dp/B0718X4DML?th=1</a>                                                                                                                                                                                           |
| Invisicup           | 17.47 | Yes | <a href="https://www.amazon.com/InvisiCup-Perfect-Menstrual-Starter-Silicone/dp/B01MSLCV0H?th=1">https://www.amazon.com/InvisiCup-Perfect-Menstrual-Starter-Silicone/dp/B01MSLCV0H?th=1</a>                                                                                                                                                                                   |
| Shelcup             | 11.99 | Yes | <a href="https://www.amazon.com/Shelcup-Mesrual-Healthy-Comfortable-Period/dp/B01N4NQ5G1?th=1">https://www.amazon.com/Shelcup-Mesrual-Healthy-Comfortable-Period/dp/B01N4NQ5G1?th=1</a>                                                                                                                                                                                       |
| Afreecup            | --    | No  | <a href="#">No active weblink</a>                                                                                                                                                                                                                                                                                                                                             |
| Alicia/Hygina       | --    | No  | <a href="#">No active weblink</a>                                                                                                                                                                                                                                                                                                                                             |
| Anytime             | --    | No  | <a href="https://www.aliexpress.com/item/2015-Anytime-Brand-Wholesale-Reusable-Medical-Grade-Silicone-Menstrual-Cup-Feminine-Hygiene-Product-Lady-Menstruation-Copo/32288941057.html?s=p">https://www.aliexpress.com/item/2015-Anytime-Brand-Wholesale-Reusable-Medical-Grade-Silicone-Menstrual-Cup-Feminine-Hygiene-Product-Lady-Menstruation-Copo/32288941057.html?s=p</a> |
| Aphrodite           | --    | No  | <a href="https://es.aliexpress.com/item/2pcs-lot-Menstruation-Cup-Reusable-Softcup-Coletor-Menstrual-Diva-Cup-Medical-Silicone-Menstrual-Cup/32489932239.html">https://es.aliexpress.com/item/2pcs-lot-Menstruation-Cup-Reusable-Softcup-Coletor-Menstrual-Diva-Cup-Medical-Silicone-Menstrual-Cup/32489932239.html</a>                                                       |
| Ava Loona           | --    | No  | <a href="#">No active weblink</a>                                                                                                                                                                                                                                                                                                                                             |
| Beianyi             | --    | No  | <a href="https://es.aliexpress.com/item/Free-Shipping-Silicone-Copa-Menstrual-Menstruation-Cup-Coppetta-Mestruale-Softcup-Menstrual-Cup-Lady-Cup-Menstrual-Care/32488786464.html">https://es.aliexpress.com/item/Free-Shipping-Silicone-Copa-Menstrual-Menstruation-Cup-Coppetta-Mestruale-Softcup-Menstrual-Cup-Lady-Cup-Menstrual-Care/32488786464.html</a>                 |
| Carrefour           | --    | No  | <a href="#">No active weblink</a>                                                                                                                                                                                                                                                                                                                                             |
| Cerene              | --    | No  | <a href="#">No active weblink</a>                                                                                                                                                                                                                                                                                                                                             |
| Continuon           | --    | No  | <a href="#">No active weblink</a>                                                                                                                                                                                                                                                                                                                                             |
| Crystal Cup         | --    | No  | <a href="#">No active weblink</a>                                                                                                                                                                                                                                                                                                                                             |
| Cup'ax              | --    | No  | <a href="https://www.cupax.co/en/">https://www.cupax.co/en/</a>                                                                                                                                                                                                                                                                                                               |
| Cuplette            | --    | No  | <a href="#">No active weblink</a>                                                                                                                                                                                                                                                                                                                                             |
| Daisy Cup           | --    | No  | <a href="#">No active weblink</a>                                                                                                                                                                                                                                                                                                                                             |
| Easy Cup            | --    | No  | <a href="#">No active weblink</a>                                                                                                                                                                                                                                                                                                                                             |
| Easy Life           | --    | No  | <a href="http://www.skynector.com/en/products-look.aspx?id=116">http://www.skynector.com/en/products-look.aspx?id=116</a>                                                                                                                                                                                                                                                     |
| EcoClean            | --    | No  | <a href="https://www.amazon.com/Menstrual-Organic-Antibacterial-Reusable-Eco-friendly/dp/B01J4G19YG">https://www.amazon.com/Menstrual-Organic-Antibacterial-Reusable-Eco-friendly/dp/B01J4G19YG</a>                                                                                                                                                                           |
| Farma Cup           | --    | No  | <a href="http://www.farmacare.it/en/catalog/disposables/farmacup-menstrual">http://www.farmacare.it/en/catalog/disposables/farmacup-menstrual</a>                                                                                                                                                                                                                             |
| Femcup              | --    | No  | <a href="https://www.facebook.com/femcup.gr/">https://www.facebook.com/femcup.gr/</a>                                                                                                                                                                                                                                                                                         |
| Femma's Cup         | --    | No  | <a href="#">No active weblink</a>                                                                                                                                                                                                                                                                                                                                             |
| Freesia/Smartcup28  | --    | No  | <a href="https://sites.google.com/site/wwwsmartcup28/">https://sites.google.com/site/wwwsmartcup28/</a>                                                                                                                                                                                                                                                                       |
| Gea Cup             | --    | No  | <a href="#">No active weblink</a>                                                                                                                                                                                                                                                                                                                                             |
| Genti-She           | --    | No  | <a href="http://genti-she.weebly.com">http://genti-she.weebly.com</a>                                                                                                                                                                                                                                                                                                         |
| Green Donna         | --    | No  | <a href="http://www.greendonna.com">www.greendonna.com</a>                                                                                                                                                                                                                                                                                                                    |
| Honeymoon           | --    | No  | <a href="https://es.aliexpress.com/item/5pcs-lot-Menstrual-Care-Coupe-Menstruelle-Menstrual-Menstruation-Cup-Medical-Grade-SiliconeTo-Discharge-Menstrual-Cup-Diva/32510865333.html">https://es.aliexpress.com/item/5pcs-lot-Menstrual-Care-Coupe-Menstruelle-Menstrual-Menstruation-Cup-Medical-Grade-SiliconeTo-Discharge-Menstrual-Cup-Diva/32510865333.html</a>           |
| Inticup             | --    | No  | <a href="http://intilife.com/Buy">http://intilife.com/Buy</a>                                                                                                                                                                                                                                                                                                                 |
| Ivita               | --    | No  | <a href="https://www.aliexpress.com/item/IVITA-Feminine-Hygiene-Silicone-Products-Vagina-Use-Lady-Menstrual-Cups-Alternative-Tampons-5pcs-lot-Transparent-Color/32722288012.html">https://www.aliexpress.com/item/IVITA-Feminine-Hygiene-Silicone-Products-Vagina-Use-Lady-Menstrual-Cups-Alternative-Tampons-5pcs-lot-Transparent-Color/32722288012.html</a>                 |
| Jasmine Cup         | --    | No  | <a href="#">No active weblink</a>                                                                                                                                                                                                                                                                                                                                             |
| La Maleta Roja      | --    | No  | <a href="http://lamaletaroja-palma.com/">http://lamaletaroja-palma.com/</a>                                                                                                                                                                                                                                                                                                   |
| Lila Cup            | --    | No  | <a href="http://www.lilacup.ru">http://www.lilacup.ru</a>                                                                                                                                                                                                                                                                                                                     |
| Lis Cup             | --    | No  | <a href="https://www.liscup.com/">https://www.liscup.com/</a>                                                                                                                                                                                                                                                                                                                 |
| Loon                | --    | No  | <a href="https://www.kickstarter.com/projects/700989404/looncup-the-worlds-first-smart-menstrual-cup">https://www.kickstarter.com/projects/700989404/looncup-the-worlds-first-smart-menstrual-cup</a>                                                                                                                                                                         |
| Luno                | --    | No  | <a href="http://www.kaliskyluno.cz/">http://www.kaliskyluno.cz/</a>                                                                                                                                                                                                                                                                                                           |
| LuxuryBody          | --    | No  | <a href="#">No active weblink</a>                                                                                                                                                                                                                                                                                                                                             |
| Melody Susie        | --    | No  | <a href="https://www.amazon.com/MelodySusieTM-Quality-Crystal-Menstrual-Childbirth/dp/B00EPE4NG4">https://www.amazon.com/MelodySusieTM-Quality-Crystal-Menstrual-Childbirth/dp/B00EPE4NG4</a>                                                                                                                                                                                 |
| MiCup               | --    | No  | <a href="#">No active weblink</a>                                                                                                                                                                                                                                                                                                                                             |
| Monicup             | --    | No  | <a href="https://www.amazon.de/dp/B01EMN7PT4?psc=1">https://www.amazon.de/dp/B01EMN7PT4?psc=1</a>                                                                                                                                                                                                                                                                             |

|                       |    |    |                                                                                                                                                                                                                                                                                                                                                                                                                                                                                                                                                                                                                                                                                                       |
|-----------------------|----|----|-------------------------------------------------------------------------------------------------------------------------------------------------------------------------------------------------------------------------------------------------------------------------------------------------------------------------------------------------------------------------------------------------------------------------------------------------------------------------------------------------------------------------------------------------------------------------------------------------------------------------------------------------------------------------------------------------------|
| Monzcare/Rainbow Cup  | -- | No | <a href="#">No active weblink</a>                                                                                                                                                                                                                                                                                                                                                                                                                                                                                                                                                                                                                                                                     |
| My Cup/ Tati          | -- | No | <a href="http://www.mycup.co.nz/product/tati-menstrual-cup-02/">http://www.mycup.co.nz/product/tati-menstrual-cup-02/</a>                                                                                                                                                                                                                                                                                                                                                                                                                                                                                                                                                                             |
| MyBelle               | -- | No | <a href="#">No active weblink</a>                                                                                                                                                                                                                                                                                                                                                                                                                                                                                                                                                                                                                                                                     |
| Nabelle               | -- | No | <a href="https://www.aliexpress.com/item/2015-NABELLE-Brand-New-Feminine-Hygiene-Women-Silicone-Menstrual-Cup-Diva-Cup-Copa-Menstrual-Coupe-Menstruelle/32489355919.html">https://www.aliexpress.com/item/2015-NABELLE-Brand-New-Feminine-Hygiene-Women-Silicone-Menstrual-Cup-Diva-Cup-Copa-Menstrual-Coupe-Menstruelle/32489355919.html</a>                                                                                                                                                                                                                                                                                                                                                         |
| Pretty Women          | -- | No | <a href="https://www.amazon.com/OVERSTOCK-SALE-Pretty-Woman-Menstrual/dp/B00NLD5W2Y">https://www.amazon.com/OVERSTOCK-SALE-Pretty-Woman-Menstrual/dp/B00NLD5W2Y</a>                                                                                                                                                                                                                                                                                                                                                                                                                                                                                                                                   |
| Puramour/ Dream Lover | -- | No | <a href="#">No active weblink</a>                                                                                                                                                                                                                                                                                                                                                                                                                                                                                                                                                                                                                                                                     |
| Si-bell               | -- | No | <a href="https://sibellmenstrualcup.com/">https://sibellmenstrualcup.com/</a>                                                                                                                                                                                                                                                                                                                                                                                                                                                                                                                                                                                                                         |
| Skinco                | -- | No | <a href="https://www.amazon.com/Menstrual-Alternative-Sanitary-Feminine-Childbirth/dp/B01EKW6WJQ/ref=as_li_ss_tl?ie=UTF8&amp;qid=1522175682&amp;sr=8-3&amp;keywords=skinco+menstrual+cup&amp;linkCode=sl1&amp;tag=menstrualcup0d-20&amp;linkId=119b5b5d47c597486452b739fdd8c661&amp;linkCode=w61&amp;imprToken=raHxBsZzZuVOIuac4AyVE4A&amp;slotNum=0">https://www.amazon.com/Menstrual-Alternative-Sanitary-Feminine-Childbirth/dp/B01EKW6WJQ/ref=as_li_ss_tl?ie=UTF8&amp;qid=1522175682&amp;sr=8-3&amp;keywords=skinco+menstrual+cup&amp;linkCode=sl1&amp;tag=menstrualcup0d-20&amp;linkId=119b5b5d47c597486452b739fdd8c661&amp;linkCode=w61&amp;imprToken=raHxBsZzZuVOIuac4AyVE4A&amp;slotNum=0</a> |
| Smilucky              | -- | No | <a href="https://www.amazon.co.uk/d/72h/Smilucky-Piece-Reusable-Medical-Silicone-Menstrual-Small/B01HT5BEKI/">https://www.amazon.co.uk/d/72h/Smilucky-Piece-Reusable-Medical-Silicone-Menstrual-Small/B01HT5BEKI/</a>                                                                                                                                                                                                                                                                                                                                                                                                                                                                                 |
| Sunsmiler             | -- | No | <a href="#">No active weblink</a>                                                                                                                                                                                                                                                                                                                                                                                                                                                                                                                                                                                                                                                                     |
| Sure Cycle            | -- | No | <a href="#">No active weblink</a>                                                                                                                                                                                                                                                                                                                                                                                                                                                                                                                                                                                                                                                                     |
| The Flower Pot        | -- | No | <a href="#">No active weblink</a>                                                                                                                                                                                                                                                                                                                                                                                                                                                                                                                                                                                                                                                                     |
| Uni Cup               | -- | No | <a href="https://www.amazon.com/MENSTRUAL-hygienic-Set-Yoga-swimming-menstrual/dp/B01JBKS93Y">https://www.amazon.com/MENSTRUAL-hygienic-Set-Yoga-swimming-menstrual/dp/B01JBKS93Y</a>                                                                                                                                                                                                                                                                                                                                                                                                                                                                                                                 |
| Victoria Love         | -- | No | <a href="https://www.facebook.com/victoriaslove/">https://www.facebook.com/victoriaslove/</a>                                                                                                                                                                                                                                                                                                                                                                                                                                                                                                                                                                                                         |
| Well Done             | -- | No | <a href="#">No active weblink</a>                                                                                                                                                                                                                                                                                                                                                                                                                                                                                                                                                                                                                                                                     |
| Zengina               | -- | No | <a href="#">No active weblink</a>                                                                                                                                                                                                                                                                                                                                                                                                                                                                                                                                                                                                                                                                     |
| Aiwo                  | -- | No | <a href="https://www.facebook.com/NOOD-668883369920060">https://www.facebook.com/NOOD-668883369920060</a>                                                                                                                                                                                                                                                                                                                                                                                                                                                                                                                                                                                             |



**Table S17. Price estimates for commonly used menstrual pads and tampons to obtain an average price per unit**

|                     | Country | Price local currency | Exchange rate (31 August 2018) | USD Price | # per pack | Number of packs | Units | Price per unit | Average price |
|---------------------|---------|----------------------|--------------------------------|-----------|------------|-----------------|-------|----------------|---------------|
| <b>TAMPAX</b>       |         |                      |                                |           |            |                 |       |                | 0.246204      |
|                     | US      | 17.04                | 1                              | 17.04     | 54         | 2               | 108   | 0.157778       |               |
|                     | UK      | 17.99                | 1.30158                        | 23.41542  | 48         | 2               | 96    | 0.243911       |               |
|                     | India   | 539                  | 0.0141                         | 7.5999    | 20         | 1               | 20    | 0.379995       |               |
|                     | Spain   | 5.18                 | 1.16806                        | 6.050551  | 30         | 1               | 30    | 0.201685       |               |
|                     | China   | 185.81               | 0.14623                        | 27.171    | 20         | 4               | 80    | 0.339637       |               |
|                     | Canada  | 7.99                 | 0.77206                        | 6.168759  | 40         | 1               | 40    | 0.154219       |               |
| <b>ALWAYS</b>       |         |                      |                                |           |            |                 |       |                | 0.288575      |
|                     | US      | 41.82                | 1                              | 41.82     | 30         | 6               | 180   | 0.232333       |               |
|                     | UK      | 4.39                 | 1.30158                        | 5.713936  | 10         | 2               | 20    | 0.285697       |               |
|                     | India   | 215                  | 0.0141                         | 3.0315    | 9          | 1               | 9     | 0.336833       |               |
|                     | Spain   | 14.29                | 1.16806                        | 16.69158  | 12         | 4               | 48    | 0.347741       |               |
|                     | China   | 183.25               | 0.14623                        | 26.79665  | 30         | 3               | 90    | 0.297741       |               |
|                     | Canada  | 8.98                 | 0.77206                        | 6.933099  | 30         | 1               | 30    | 0.231103       |               |
| <b>O.B.</b>         |         |                      |                                |           |            |                 |       |                | 0.179317      |
|                     | US      | 6.23                 | 1                              | 6.23      | 40         | 1               | 40    | 0.15575        |               |
|                     | UK      | 9                    | 1.30158                        | 11.71422  | 32         | 3               | 96    | 0.122023       |               |
|                     | India   | 378                  | 0.0141                         | 5.3298    | 20         | 2               | 40    | 0.133245       |               |
|                     | Spain   | 8.99                 | 1.16806                        | 10.50086  | 56         | 1               | 56    | 0.187515       |               |
|                     | China   | 91.14                | 0.14623                        | 13.3274   | 40         | 1               | 40    | 0.333185       |               |
|                     | Canada  | 7.47                 | 0.77206                        | 5.767288  | 40         | 1               | 40    | 0.144182       |               |
| <b>Kotex (Pads)</b> |         |                      |                                |           |            |                 |       |                | 0.331882      |
|                     | US      | 27.59                | 1                              | 27.59     | 44         | 3               | 132   | 0.209015       |               |
|                     | UK      | 11.95                | 1.30158                        | 15.55388  | 14         | 4               | 56    | 0.277748       |               |
|                     | India   | 1963                 | 0.0141                         | 27.6783   | 50         | 1               | 50    | 0.553566       |               |
|                     | Spain   | 22.06                | 1.16806                        | 25.7674   | 12         | 4               | 48    | 0.536821       |               |
|                     | China   | 299.43               | 0.14623                        | 43.78565  | 28         | 6               | 168   | 0.260629       |               |
|                     | Canada  | 11.93                | 0.77206                        | 9.210676  | 60         | 1               | 60    | 0.153511       |               |

Note: The search through Amazon prime was conducted on the 5<sup>th</sup> of October 2018.

The average price for pads used in the calculations was \$US 0.31 for pads (the average of the price for Always and Kotex), and \$US 0.21 for tampons (the average of the price for Ob and Tampax).

**Table S18. Calculations of costs and waste for sanitary pads and tampons over 10 years**

| No of pads per month                         | 9        | 12       | 15       | 20       | 25       | No of tampons per month                         | 9        | 12       | 15       | 20       | 25       |
|----------------------------------------------|----------|----------|----------|----------|----------|-------------------------------------------------|----------|----------|----------|----------|----------|
| Cost of pad (US\$)                           | 0.31     | 0.31     | 0.31     | 0.31     | 0.31     | Cost of tampon (US\$)                           | 0.21     | 0.21     | 0.21     | 0.21     | 0.21     |
| No of pads per yr                            | 117      | 156      | 195      | 260      | 325      | No of tampons per yr                            | 117      | 156      | 195      | 260      | 325      |
| No of pads per 10 yrs                        | 1170     | 1560     | 1950     | 2600     | 3250     | No of tampons per 10 yrs                        | 1170     | 1560     | 1950     | 2600     | 3250     |
| Costs per yr (US\$)                          | 36.27    | 48.36    | 60.45    | 80.6     | 100.75   | Costs per yr (US\$)                             | 24.57    | 32.76    | 40.95    | 54.6     | 68.25    |
| Costs per 10 yrs (US\$)                      | 362.7    | 483.6    | 604.5    | 806      | 1007.5   | Costs per 10 yrs (US\$)                         | 245.7    | 327.6    | 409.5    | 546      | 682.5    |
| Blood loss/period (grams)                    | 35       | 35       | 35       | 35       | 35       | Blood loss/period (grams)                       | 35       | 35       | 35       | 35       | 35       |
| Blood loss/year (grams)                      | 455      | 455      | 455      | 455      | 455      | Blood loss/yr (grams)                           | 455      | 455      | 455      | 455      | 455      |
| Blood loss/10 yr (grams)                     | 4550     | 4550     | 4550     | 4550     | 4550     | Blood loss/10 yr (grams)                        | 4550     | 4550     | 4550     | 4550     | 4550     |
| Blood loss/10 yr (kg)                        | 4.55     | 4.55     | 4.55     | 4.55     | 4.55     | Blood loss/10 yr (kg)                           | 4.55     | 4.55     | 4.55     | 4.55     | 4.55     |
|                                              |          |          |          |          |          |                                                 |          |          |          |          |          |
| Weight/pad (grams)                           | 6.8      | 6.8      | 6.8      | 6.8      | 6.8      | Weight per tampon (grams)                       | 3.6      | 3.6      | 3.6      | 3.6      | 3.6      |
| Weight pads per yr (grams)                   | 795.6    | 1060.8   | 1326     | 1768     | 2210     | Weights tampons per yr (grams)                  | 421.2    | 561.6    | 702      | 936      | 1170     |
| Weight pads per 10 yrs (grams)               | 7956     | 10608    | 13260    | 17680    | 22100    | Weights tampons per 10 yrs (grams)              | 4212     | 5616     | 7020     | 9360     | 11700    |
| Weight pads per 10 yrs (kg)                  | 7.956    | 10.608   | 13.26    | 17.68    | 22.1     | Weight tampons per 10 yrs (kg)                  | 4.212    | 5.616    | 7.02     | 9.36     | 11.7     |
| Percentage plastic in pad (%)                | 34.78992 | 34.78992 | 34.78992 | 34.78992 | 34.78992 | Percentage plastic in tampon (%)                | 4.485249 | 4.485249 | 4.485249 | 4.485249 | 4.485249 |
| Plastic waste in pad in 10 yrs (kg)          | 2.767886 | 3.690514 | 4.613143 | 6.150857 | 7.688571 | Plastic waste in tampon in 10 yrs (kg)          | 0.191379 | 0.255171 | 0.318964 | 0.425286 | 0.531607 |
| Non-plastic waste in pad in 10 yrs (kg)      | 5.188114 | 6.917486 | 8.646857 | 11.52914 | 14.41143 | Non-plastic waste in tampon in 10 yrs (kg)      | 4.075465 | 5.433954 | 6.792442 | 9.056589 | 11.32074 |
| Non-plastic waste + blood, pads, 10 yrs (kg) | 9.738114 | 11.46749 | 13.19686 | 16.07914 | 18.96143 | Non-plastic waste + blood, tampons, 10 yrs (kg) | 8.625465 | 9.983954 | 11.34244 | 13.60659 | 15.87074 |
| Total waste pads 10 yrs (kg)                 | 12.51    | 15.16    | 17.81    | 22.23    | 26.65    | Total waste tampons 10 yrs (kg)                 | 8.82     | 10.24    | 11.66    | 14.03    | 16.40    |

yr: year.

**Figure S16. Estimation of costs and waste of different products used for menstruation over 10 years**

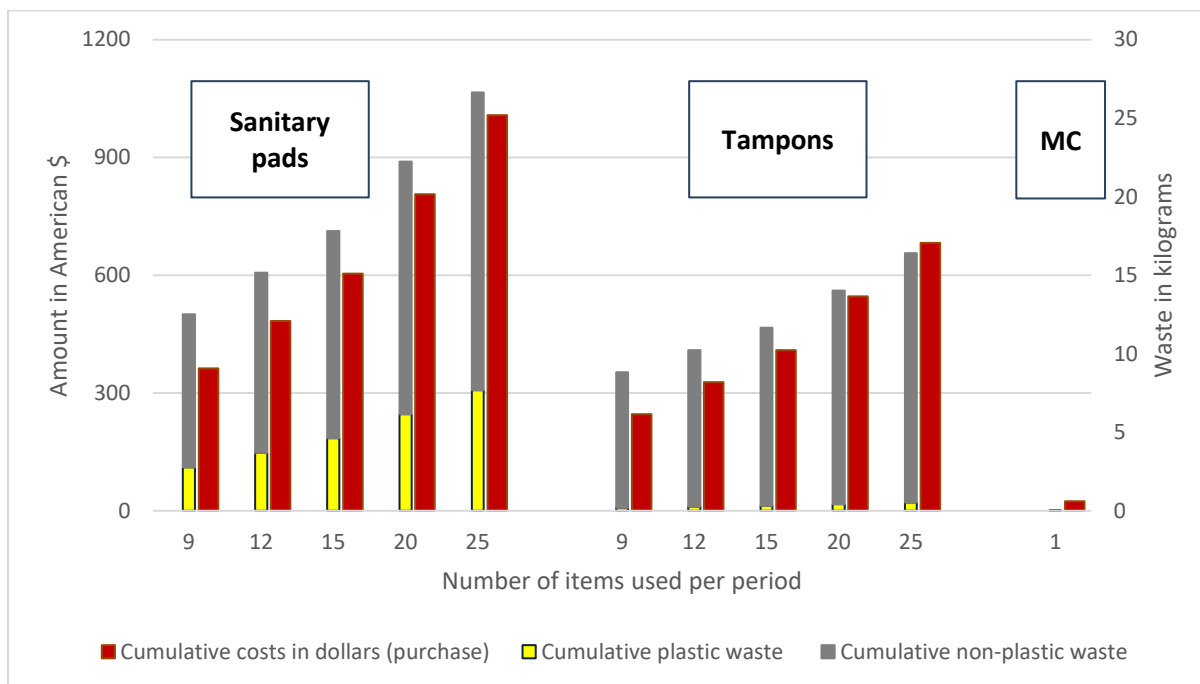

MC: menstrual cup. Note: Cost estimates of sanitary pads and tampons conducted in October 2018. Using accumulated estimates over 10 years, purchase costs of and waste from consistent MC-use (vaginal cup) would be a small fraction of the waste and purchase costs of pads or tampons: e.g. 5% and 7% of the purchase costs and 0.4% and 6% of the plastic waste when using 12 pads or tampons per period, respectively. Combined use of menstrual products during a period (e.g. panty liners for light days), the use of more than one cup over 10 years, inflation and production costs, and waste estimates were not taken into account in these calculations.

### 3. Web resources

#### Blogs, forums and discussion platforms

We searched for supplemental information pertaining to the use, acceptability, and effectiveness of menstrual cups among the non-scientific community. Online blog, forum, and discussion platforms were assessed for relevance and for information not previously discussed in the primary scientific literature. These platforms were accessed using google searches and screened until saturation (3 pages without new references). Searches were conducted for adverse events relating to menstrual cups, including topics on menstrual cup retention, infection, and endometriosis.

Most entries surrounded the benefits of using menstrual cups, examining prices, environmental impact, and the changing narrative around menstruation. The discussion forums and blogs highlighted the nuances of insertion, wearing, and removal, as these processes were the areas where people experienced the most difficulty. Many women share their experiences online, with others offering advice and encouragement.

On a forum for menstrual cup support ([menstrual\\_cups.livejournal.com](http://menstrual_cups.livejournal.com)), one user describes intensified pain while using the DivaCup, only on specific days of her cycle. A responder explained that this pain may be due to suction of the cup on her cervix (due to the cup length). She is instructed to try flipping the cup inside-out to decrease the length and placement of the cup within the vagina. Another responder agrees and explains that the cervix changes in length throughout the cycle, which may affect the needed length of the menstrual cup. The firmness of the DivaCup is listed as a potential area for consideration, and alternative, less-firm menstrual cup brands are recommended.

Another forum entry, using the same platform as above, requests advice for inserting the cup. The initial poster explained she has experienced a lot of pain while attempting to insert the cup. Responders recommend different techniques for insertion, including relaxation, positioning of cup, different cup folds, and the use of lubrication. Additional responses recommend that if pain persists after trying the recommendations, the user should see a doctor for possible vaginal pain conditions, including vulvodynia.

Serious adverse events are also discussed in blogs and forums. In the comment sections of a blog by Dr Jen Gunter (Toxic Shock Syndrome is also Related to Menstrual Cups), many cup users asked about symptoms and experiences. "Airstreamtattoo" commented that she experienced TSS as a result of using the Mooncup, even with regular washing and boiling. She later commented on the resulting discussion that the source of the bacteria was in uncleaned ventilation holes. The user stated that she did continue using a separate menstrual cup after the TSS case. This case has not been reported in a scientific publication.

The discussion on TSS was developed further in a blog titled "Menstrual Cups are More Likely to Cause Toxic Shock Syndrome than Tampons." This blog cites research from the University Hospital of Lyon which claims that menstrual cups are more likely to cause TSS than tampons due to the fact that they allow more air into the vagina. Additionally, since they are not removed as frequently as tampons, the researchers claim this allows for a greater opportunity for bacteria growth. This may be referring to the paper by Nonfoux et al.<sup>54</sup>, which used an in-vitro model to examine the development of *S. aureus* and toxins with cups and tampons. However, it is not clear how applicable this in-vitro model is to the "real-life" situation, presented in other papers showing no difference between groups using a variety of products.

Though many of the broad benefits and problems associated with menstrual cups are discussed in scientific publications, the specific conversations and nuances of cup use on websites can provide critical insight into user experiences and can highlight issues missed by researchers. These platforms are able to reach individuals around the world, enabling a wide diversity of individuals to ask questions or provide responses.

**Table S19. Informal information on menstrual cups and serious adverse events on the internet**

| Key Word Search                | URL                                                                                                                                                                                                                                                                       | Title                                                                                   | Author (If Available) | Date Published   | Type of Source       | Content                                                                                                                                                                                                                                                                                                                                                                                                                                                                                                                  |
|--------------------------------|---------------------------------------------------------------------------------------------------------------------------------------------------------------------------------------------------------------------------------------------------------------------------|-----------------------------------------------------------------------------------------|-----------------------|------------------|----------------------|--------------------------------------------------------------------------------------------------------------------------------------------------------------------------------------------------------------------------------------------------------------------------------------------------------------------------------------------------------------------------------------------------------------------------------------------------------------------------------------------------------------------------|
| Menstrual cup + infection      | <a href="http://metro.co.uk/2017/07/06/menstrual-cups-are-more-likely-to-cause-toxic-shock-syndrome-than-tampons-claims-study-6758784/">http://metro.co.uk/2017/07/06/menstrual-cups-are-more-likely-to-cause-toxic-shock-syndrome-than-tampons-claims-study-6758784/</a> | Menstrual Cups are More Likely to Cause Toxic Shock Syndrome than Tampons, Claims Study | Miranda Larbi         | July 6, 2017     | Blog, website        | Cites research from the University hospital of Lyon which claims that menstrual cups are more likely to cause toxic shock syndrome than tampons due to the fact that they allow more air into the vagina. Additionally, since they are not removed as frequently as tampons, the research claim this allows for more opportunity for bacteria growth.<br>Note authors: this may have referred to the in-vitro study of Nonfoux et al., 2018 <sup>54</sup>                                                                |
| Menstrual cup + issues         | <a href="https://drjengunter.wordpress.com/2015/10/28/toxic-shock-syndrome-is-also-related-to-menstrual-cups/">https://drjengunter.wordpress.com/2015/10/28/toxic-shock-syndrome-is-also-related-to-menstrual-cups/</a>                                                   | Toxic Shock Syndrome is also Related to Menstrual Cups                                  | N/A                   | Variety          | Forum, blog, website | In the comment sections of the blog by Dr Jen Gunter (see above), many cup users asked about symptoms and experiences. "Airstreamtattoo" commented on November 1, 2015 stating that she experienced TSS as a result of using the Mooncup, even with regular washing/boiling. She later commented on January 1, 2016 that the source of the bacteria was in uncleaned ventilation holes. The user did continue using a menstrual cup after the toxic shock syndrome (a different cup)                                     |
| Menstrual cup + insertion      | <a href="https://menstrual-cups.livejournal.com/">https://menstrual-cups.livejournal.com/</a>                                                                                                                                                                             | Menstrual Cups - DivaCup, Mooncup, Instead, Lunette, MiaCup                             | N/A                   | Variety          | Forum, website       | Forum for menstrual cup users to ask questions and reply to concerns from current of potential cup users. The forum is open to anyone wishing to participate.                                                                                                                                                                                                                                                                                                                                                            |
| Menstrual Cup + Horror Stories | <a href="https://www.thehairpin.com/2014/01/the-best-time-a-diva-cup-suctioned-itself-to-my-cervix/">https://www.thehairpin.com/2014/01/the-best-time-a-diva-cup-suctioned-itself-to-my-cervix/</a>                                                                       | The Best Time a Diva Cup Suctioned Itself to My Cervix                                  | Amy Starfish          | January 10, 2014 | Blog, website        | Recounts her experience with the diva cup- explaining that after a day of use, she could not remove it. She left it in for 24 hours then went to a local Urgent care center. The nurse had never heard of the diva cup and could not remove it. She was sent to the ER, where a nurse had to remove the cup from the opening of her cervix using large scissor forceps. She claims it moved because she did not properly turn the cup 360 degrees to create a proper seal.                                               |
| Menstrual cup + issues         | <a href="https://drjengunter.wordpress.com/2015/10/28/toxic-shock-syndrome-is-also-related-to-menstrual-cups/">https://drjengunter.wordpress.com/2015/10/28/toxic-shock-syndrome-is-also-related-to-menstrual-cups/</a>                                                   | Toxic Shock Syndrome is also Related to Menstrual Cups                                  | Jen Gunter            | October 28, 2015 | Blog, website        | The author explains that there are risks of TSS while using the menstrual cup. She explains the case of TSS (Mitchell 2015) has only occurred once and that this should not stop anyone from using menstrual cups.                                                                                                                                                                                                                                                                                                       |
| Menstrual cup + toxic shock    | <a href="https://www.consumerreports.org/women-s-health/menstrual-cups-linked-to-toxic-shock-syndrome/">https://www.consumerreports.org/women-s-health/menstrual-cups-linked-to-toxic-shock-syndrome/</a>                                                                 | Menstrual Cup linked to toxic shock syndrome, new study finds                           | Hallie Levine         | 4/20/2018        | Article, website     | An article discusses a new study (linked at end) which found that menstrual cups were just as likely as tampons to carry TSS-causing bacteria. "Impact of currently marketed tampons and menstrual cups on Staphylococcus aureus growth and TSST-1 production in vitro."<br><a href="http://aem.asm.org/content/early/2018/04/02/AEM.00351-18.abstract">http://aem.asm.org/content/early/2018/04/02/AEM.00351-18.abstract</a><br>Note authors: this referred to the in-vitro study of Nonfoux et al., 2018 <sup>54</sup> |
| Menstrual cup + endometriosis  | <a href="http://www.prweb.com/releases/2005/07/prweb258853.htm">http://www.prweb.com/releases/2005/07/prweb258853.htm</a>                                                                                                                                                 | Menstrual Cups Fail to Warn of Endometriosis Risk                                       | PRWEB                 | July 12, 2005    | Article, website     | An article stating that menstrual cup manufacturers have failed to put warnings on labels regarding risk of endometriosis, as FDA has stated it is "plausible"                                                                                                                                                                                                                                                                                                                                                           |

## References

1. Phillips-Howard PA, Nyothach E, Ter Kuile FO, et al. Menstrual cups and sanitary pads to reduce school attrition, and sexually transmitted and reproductive tract infections: a cluster randomised controlled feasibility study in rural Western Kenya. *BMJ Open* 2016; **6**: e013229.
2. Femme International. Monitoring & Evaluation Report Kilimanjaro Region 2017: Successes and lessons learned from the Thaweza program. 2017. <https://www.femmeinternational.org/wp-content/uploads/2018/09/Femme-International-ME-Report-2017.pdf> (accessed May 28, 2019).
3. Madziyire MG, Magure TM, Madziwa CF. Menstrual cups as a menstrual management method for low socioeconomic status women and girls in Zimbabwe: a pilot study. *Women's Reprod Health* 2018; **5**: 59-65.
4. Higgins JP, Thompson SG, Deeks JJ, Altman DG. Measuring inconsistency in meta-analyses. *BMJ* 2003; **327**: 557-60.
5. Deeks JJ, Higgins JP, Altman DG. Analysing data and undertaking meta-analyses. In: Higgins JP, Green S, editors. *Cochrane handbook for systematic reviews of interventions* (version 5.1.0): The Cochrane Collaboration; 2011.
6. Public Health England. PHE Technical Guide - Funnel Plots. 2018. <https://fingertips.phe.org.uk/profile/guidance> (accessed May 28, 2019).
7. Sterne JA, Gavaghan D, Egger M. Publication and related bias in meta-analysis: power of statistical tests and prevalence in the literature. *J Clin Epidemiol* 2000; **53**: 1119-29.
8. Critical Appraisal Skills Programme (CASP). CASP Checklists. 2017. <http://www.casp-uk.net/casp-tools-checklists> (accessed May 28, 2019).
9. Dixon-Woods M, Agarwal S, Jones D, Young B, Sutton A. Synthesising qualitative and quantitative evidence: a review of possible methods. *J Health Serv Res Policy* 2005; **10**: 45-53.
10. Thomas J, Harden A. Methods for the thematic synthesis of qualitative research in systematic reviews. *BMC Med Res Methodol* 2008; **8**: 45.
11. Menstrual Cup Master List. 2017. <https://menstrualcups.wordpress.com/menstrual-cup-master-list/> (accessed May 28, 2019).
12. Howard C, Rose CL, Trouton K, et al. FLOW (finding lasting options for women): multicentre randomized controlled trial comparing tampons with menstrual cups. *Can Fam Physician* 2011; **57**: e208-15.
13. Bekinska ME, Smit J, Greener R, et al. Acceptability and performance of the menstrual cup in South Africa: a randomized crossover trial comparing the menstrual cup to tampons or sanitary pads. *J Womens Health* 2015; **24**: 151-8.
14. North B, Oldham M. Preclinical, Clinical, and Over-the-Counter Postmarketing Experience with a New Vaginal Cup: Menstrual Collection. *J Womens Health* 2011; **20**: 303-11.
15. Mazgaj M, Yaramenka K, Malovana O. Comparative life cycle assessment of sanitary pads and tampons. 2006. <http://docplayer.net/39797321-Comparative-life-cycle-assessment-of-sanitary-pads-and-tampons.html> (accessed May 28, 2019).
16. Munro MG, Critchley HO, Fraser IS. The FIGO systems for nomenclature and classification of causes of abnormal uterine bleeding in the reproductive years: who needs them? *Am J Obstet Gynecol* 2012; **207**: 259-65.
17. Bekinska M, Smit J, Greener R, et al. 'It gets easier with practice'. A randomised cross-over trial comparing the menstrual cup to tampons or sanitary pads in a low resource setting. *Eur J Contracept Reprod Health Care* 2016; **21**: 138.
18. Bekinska M, Smit J, Greener R, Maphumulo V, Mabude Z. Better menstrual management options for adolescents needed in South Africa: What about the menstrual cup? *S Afr Med J* 2015; **105**: 331.
19. Hoffmann V, Adelman S, Sebastian A. Learning by doing something else: Experience with alternatives and adoption of a high-barrier menstrual hygiene technology. 2014. <https://docplayer.net/41533102-Learning-by-doing-something-else-experience-with-alternatives-and-adoption-of-a-high-barrier-menstrual-hygiene-technology.html> (accessed May 28, 2019).
20. Oster E, Thornton R. Menstruation and Education in Nepal. 2009. <http://www.nber.org/papers/w14853> (accessed May 28, 2019).
21. Oster E, Thornton R. Determinants of Technology Adoption: Private Value and Peer Effects in Menstrual Cup Take-Up 2009. <http://www.nber.org/papers/w14828> (accessed May 28, 2019).
22. Oster E, Thornton R. Menstruation, sanitary products, and school attendance: evidence from a randomized evaluation. *Am Econ J Appl Econ* 2011; **3**: 91-100.
23. Oster E, Thornton R. Determinants of technology adoption: Peer effects in menstrual cup up-take. *J Eur Econ Assoc* 2012; **10**: 1263-93.
24. African Population and Health Research Center. Attitudes towards, and acceptability of, menstrual cups as a method for managing menstruation: experiences of women and school girls in Nairobi, Kenya. 2010. [http://www.susana.org/\\_resources/documents/default/2-984-policy-brief-no-21-2010-attitudes-and-acceptability.pdf](http://www.susana.org/_resources/documents/default/2-984-policy-brief-no-21-2010-attitudes-and-acceptability.pdf) (accessed May 28, 2019).
25. African Population and Health Research Center. Use of menstrual cup by adolescent girls and women: potential benefits and key challenges. 2010. <https://www.susana.org/en/knowledge-hub/resources-and-publications/library/details/985> (accessed May 28, 2019).
26. African Population and Health Research Center. Experiences and problems with menstruation among poor women and schoolgirls in Nairobi, Kenya. 2010. [http://www.communityledtotalsanitation.org/sites/communityledtotalsanitation.org/files/PolicyBrief\\_Mooncups\\_Kenya.pdf](http://www.communityledtotalsanitation.org/sites/communityledtotalsanitation.org/files/PolicyBrief_Mooncups_Kenya.pdf) (accessed May 28, 2019).

27. Care International Uganda. Ruby Cups: Girls in Imvepi Refugee Settlement Taking Control. 2018. <http://womens.dk/ruby-cups-girls-in-imvepi-refugee-settlement-taking-control/> (accessed May 28, 2019).
28. Cattanach JF. The Gynaesal diaphragm tampon. *Med J Aust* 1990; **152**: 52-3.
29. Cattanach JF. A diaphragm tampon applied to an ovulation method in a birth control system. *Contracept* 1991; **44**: 607-21.
30. Cheng M, Kung R, Hannah M, Wilansky D, Shime J. Menses cup evaluation study. *Fertil Steril* 1995; **64**: 661-3.
31. Chintan S, Dipesh P, Maitri P. Use of Flow care Menstrual Cups over conventional menstrual products in India. *Int J Adv Res Dev* 2017; **2**: 78-82.
32. Ganyaglo GYK, Ryan N, Park J, Lassey AT. Feasibility and acceptability of the menstrual cup for non-surgical management of vesicovaginal fistula among women at a health facility in Ghana. *Plos One* 2018; **13**: e0207925.
33. Ryan N. Feasibility, acceptability, and appropriateness of the vaginal menstrual cup for short term non-surgical management of vesicovaginal fistula (VVF) among potential users and stakeholders. *Implement Sci* 2018; **13**: S80.
34. Gleeson N, Devitt M, Buggy F, Bonnar J. Menstrual blood loss measurement with gynaesal. *Aust N Z J Obstet Gynaecol* 1993; **33**: 79-80.
35. Kakani CR, Bhatt JK. Study of adaptability and efficacy of menstrual cup in managing menstrual health and hygiene. *Int J Reprod Contracept Obstet Gynecol* 2017; **6**: 3045-53.
36. Madziyire MG, Magure TM, Madziwa CF. The safety of menstrual cups in women of low socio-economic status in Zimbabwe: pilot study. *Cent Afr J Med* 2018; **64**: 59-65.
37. Parker J, Bushell RW, Behrman SJ. Hygienic control of menorrhagia: use of rubber menstrual cup. *Int J Fertil* 1966; **9**: 619-21.
38. Pena EF. Menstrual protection. Advantages of the menstrual cup. *Obstet Gynecol* 1962; **19**: 684-7.
39. Shihata A, Brody S. An innovative, reusable menstrual cup that enhances the quality of women's lives during menstruation. *Br J Med Med Res* 2014; **4**: 3581-90.
40. Stewart K, Greer R, Powell M. Women's experience of using the Mooncup. *J Obstet Gynaecol* 2010; **30**: 285-7.
41. Tellier M, Hyttel M, Gad M. Assessing acceptability and hygienic safety of menstrual cups as a menstrual management method for vulnerable young women in Uganda Red Cross Society's Life Planning Skills Project 2012. <http://womens.dk/wp-content/uploads/2015/11/Menstrual-Cups--WoMena--Uganda-Pilot-Study-Report-Dec-2012-new-version.pdf> (accessed May 28, 2019).
42. Wiebe ER, Trouton KJ. Does using tampons or menstrual cups increase early IUD expulsion rates? *Contracept* 2012; **86**: 119-21.
43. Averbach S, Sahin-Hodoglugil N, Musara P, Chipato T, van der Straten A. Duet for menstrual protection: a feasibility study in Zimbabwe. *Contracept* 2009; **79**: 463-8.
44. Borowski A. Are American women turning to reusable and greener menstrual products due to health and environmental pollution concerns? 2011. <http://scholarworks.rit.edu/theses/544/> (accessed May 28, 2019).
45. Grose RG, Grabe S. Sociocultural attitudes surrounding menstruation and alternative menstrual products: the explanatory role of self-objectification. *Health Care Women Int* 2014; **35**: 677-94.
46. Stewart K, Powell M, Greer R. An alternative to conventional sanitary protection: would women use a menstrual cup? *J Obstet Gynaecol* 2009; **29**: 49-52.
47. Goldberg L, Elsamra S, Hutchinson-Colas J, Segal S. Delayed Diagnosis of Vesicouterine Fistula After Treatment for Mixed Urinary Incontinence: Menstrual Cup Management and Diagnosis. *Female Pelvic Med Reconstr Surg* 2016; **22**: e29-31.
48. Russell KW, Robinson RE, Mone MC, Scaife CL. Enterovaginal or Vesicovaginal Fistula Control Using a Silicone Cup. *Obstet Gynecol* 2016; **128**: 1365-8.
49. Hyttel M, Thomsen CF, Luff B, Storrusten H, Nyakato VN, Tellier M. Drivers and challenges to use of menstrual cups among schoolgirls in rural Uganda: a qualitative study. *Waterlines* 2017; **36**: 109-24.
50. Sundqvist J. A cup of freedom? A study of menstrual cup's impact on girls' capabilities. 2015. <http://www.diva-portal.org/smash/record.jsf?pid=diva2%3A783661&dswid=-5356> (accessed May 28, 2019).
51. Mason L, Laserson K, Oruko K, et al. Adolescent schoolgirls' experiences of menstrual cups and pads in rural western Kenya: a qualitative study. *Waterlines* 2015; **34**: 15-30.
52. van Eijk AM, Laserson KF, Nyothach E, et al. Use of menstrual cups among school girls: longitudinal observations nested in a randomised controlled feasibility study in rural Western Kenya. *Reprod Health* 2018; **15**: 139.
53. Shihata AA. Device and method for menstrual blood collection. 2014. <https://patents.google.com/patent/US20130110060> (accessed May 28, 2019).
54. Nonfoux L, Chiaruzzi M, Badiou C, et al. Impact of currently marketed tampons and menstrual cups on Staphylococcus aureus growth and TSST-1 production in vitro. *Appl Environ Microbiol* 2018; **84**: e0035-18.
